# Supplementary material
Source: publisher figshare collection journal article supplement (https://acs.figshare.com/ndownloader/files/4526368)
Supplement: Supplementary file 1 [file 4526368]

  
data_3a
_publ_contact_author_name        'R.J. Puddephatt'
_publ_contact_author_address     
;Department of Chemistry
University of Western Ontario
London, Canada N6A 5B7
;
_publ_contact_author_email       pudd@uwo.ca
_publ_contact_author_phone       519-661-2111
_publ_contact_author_fax         519-611-3022
loop_
_publ_author_name
_publ_author_address
'Puddephatt, R.J.'
;Department of Chemistry
University of Western Ontario
London, Canada N6A 5B7
;

_audit_creation_method           SHELXL-97
_chemical_name_systematic        
; 
 ? 
;
_chemical_name_common            ?
_chemical_melting_point          ?
_chemical_formula_moiety         'C20 H26 Br N3 O6 Pt, 2(C H4 O)'
_chemical_formula_sum            'C22 H34 Br N3 O8 Pt'
_chemical_formula_weight         743.52

loop_
_atom_type_symbol
_atom_type_description
_atom_type_scat_dispersion_real
_atom_type_scat_dispersion_imag
_atom_type_scat_source
C C 0.0033 0.0016 'International Tables Vol C Tables 4.2.6.8 and 6.1.1.4'
H H 0.0000 0.0000 'International Tables Vol C Tables 4.2.6.8 and 6.1.1.4'
N N 0.0061 0.0033 'International Tables Vol C Tables 4.2.6.8 and 6.1.1.4'
O O 0.0106 0.0060 'International Tables Vol C Tables 4.2.6.8 and 6.1.1.4'
Br Br -0.2901 2.4595 'International Tables Vol C Tables 4.2.6.8 and 6.1.1.4'
Pt Pt -1.7033 8.3905 'International Tables Vol C Tables 4.2.6.8 and 6.1.1.4'

_symmetry_cell_setting           Triclinic
_symmetry_space_group_name_H-M   'P -1'
_symmetry_space_group_name_Hall  '-P 1'

loop_
_symmetry_equiv_pos_as_xyz
'x, y, z'
'-x, -y, -z'

_cell_length_a                   10.9855(4)
_cell_length_b                   14.8935(4)
_cell_length_c                   16.7239(5)
_cell_angle_alpha                97.517(2)
_cell_angle_beta                 90.504(2)
_cell_angle_gamma                102.991(2)
_cell_volume                     2641.23(14)
_cell_formula_units_Z            4
_cell_measurement_temperature    150(2)
_cell_measurement_reflns_used    23908
_cell_measurement_theta_min      2.04
_cell_measurement_theta_max      30.03

_exptl_crystal_description       plate
_exptl_crystal_colour            colourless
_exptl_crystal_size_max          0.43
_exptl_crystal_size_mid          0.35
_exptl_crystal_size_min          0.05
_exptl_crystal_density_meas      ?
_exptl_crystal_density_diffrn    1.870
_exptl_crystal_density_method    'not measured'
_exptl_crystal_F_000             1456
_exptl_absorpt_coefficient_mu    6.875
_exptl_absorpt_correction_type   multi-scan
_exptl_absorpt_correction_T_min  0.0782
_exptl_absorpt_correction_T_max  0.7250
_exptl_absorpt_process_details   'DENZO-SMN (Otwinowski & Minor, 1997)'

_exptl_special_details           
; 
 ? 
;

_diffrn_ambient_temperature      150(2)
_diffrn_radiation_wavelength     0.71073
_diffrn_radiation_type           MoK\a
_diffrn_radiation_source         'fine-focus sealed tube'
_diffrn_radiation_monochromator  graphite
_diffrn_measurement_device_type  'Nonius Kappa-CCD'
_diffrn_measurement_method       '\f scans, and \w scans with \k offsets'
_diffrn_detector_area_resol_mean ?
_diffrn_standards_number         0
_diffrn_standards_interval_count ?
_diffrn_standards_interval_time  ?
_diffrn_standards_decay_%        ?
_diffrn_reflns_number            31281
_diffrn_reflns_av_R_equivalents  0.056
_diffrn_reflns_av_sigmaI/netI    0.0431
_diffrn_reflns_limit_h_min       -13
_diffrn_reflns_limit_h_max       13
_diffrn_reflns_limit_k_min       -17
_diffrn_reflns_limit_k_max       17
_diffrn_reflns_limit_l_min       -19
_diffrn_reflns_limit_l_max       19
_diffrn_reflns_theta_min         2.62
_diffrn_reflns_theta_max         25.03
_reflns_number_total             8865
_reflns_number_gt                7836
_reflns_threshold_expression     I>2\s(I)

_computing_data_collection       'COLLECT (Nonius, 1997-2001)'
_computing_cell_refinement       'DENZO-SMN (Otwinowski & Minor, 1997)'
_computing_data_reduction        DENZO-SMN
_computing_structure_solution    'SHELXS-97 (Sheldrick, 1997)'
_computing_structure_refinement  'SHELXL-97 (Sheldrick, 1997)'
_computing_molecular_graphics    'SHELXTL/PC (Sheldrick, 2001)'
_computing_publication_material  SHELXTL/PC

_refine_special_details          
; 
 Refinement of F^2^ against ALL reflections.  The weighted R-factor wR and 
 goodness of fit S are based on F^2^, conventional R-factors R are based 
 on F, with F set to zero for negative F^2^. The threshold expression of 
 F^2^ > 2sigma(F^2^) is used only for calculating R-factors(gt) etc. and is 
 not relevant to the choice of reflections for refinement.  R-factors based 
 on F^2^ are statistically about twice as large as those based on F, and R- 
 factors based on ALL data will be even larger. 
;

_refine_ls_structure_factor_coef Fsqd
_refine_ls_matrix_type           full
_refine_ls_weighting_scheme      calc
_refine_ls_weighting_details     
'calc w=1/[\s^2^(Fo^2^)+(0.1127P)^2^+6.0017P] where P=(Fo^2^+2Fc^2^)/3'
_atom_sites_solution_primary     direct
_atom_sites_solution_secondary   difmap
_atom_sites_solution_hydrogens   geom
_refine_ls_hydrogen_treatment    constr
_refine_ls_extinction_method     none
_refine_ls_extinction_coef       ?
_refine_ls_number_reflns         8865
_refine_ls_number_parameters     647
_refine_ls_number_restraints     0
_refine_ls_R_factor_all          0.0598
_refine_ls_R_factor_gt           0.0540
_refine_ls_wR_factor_ref         0.1513
_refine_ls_wR_factor_gt          0.1443
_refine_ls_goodness_of_fit_ref   1.039
_refine_ls_restrained_S_all      1.039
_refine_ls_shift/su_max          0.001
_refine_ls_shift/su_mean         0.000

loop_
_atom_site_label
_atom_site_type_symbol
_atom_site_fract_x
_atom_site_fract_y
_atom_site_fract_z
_atom_site_U_iso_or_equiv
_atom_site_adp_type
_atom_site_occupancy
_atom_site_symmetry_multiplicity
_atom_site_calc_flag
_atom_site_refinement_flags
_atom_site_disorder_assembly
_atom_site_disorder_group
PtA Pt 0.22756(2) 0.319136(16) 0.488826(16) 0.01386(12) Uani 1 1 d . . .
BrA Br 0.00661(7) 0.24866(5) 0.53321(4) 0.01966(18) Uani 1 1 d . . .
C1A C 0.3060(7) 0.2668(5) 0.5798(4) 0.0204(16) Uani 1 1 d . . .
H1A H 0.2426 0.2480 0.6189 0.031 Uiso 1 1 calc R . .
H1B H 0.3753 0.3148 0.6069 0.031 Uiso 1 1 calc R . .
H1C H 0.3373 0.2128 0.5567 0.031 Uiso 1 1 calc R . .
C2A C 0.2283(7) 0.1964(5) 0.4166(4) 0.0203(16) Uani 1 1 d . . .
H2A H 0.2093 0.2024 0.3604 0.030 Uiso 1 1 calc R . .
H2B H 0.1651 0.1460 0.4342 0.030 Uiso 1 1 calc R . .
H2C H 0.3110 0.1824 0.4207 0.030 Uiso 1 1 calc R . .
C3A C 0.4099(7) 0.3684(5) 0.4576(5) 0.0218(16) Uani 1 1 d . . .
H3A H 0.4499 0.4221 0.4977 0.026 Uiso 1 1 calc R . .
H3B H 0.4567 0.3191 0.4598 0.026 Uiso 1 1 calc R . .
C4A C 0.4188(7) 0.3968(5) 0.3775(5) 0.0221(17) Uani 1 1 d . . .
O5A O 0.4317(5) 0.3459(4) 0.3159(3) 0.0303(12) Uani 1 1 d . . .
O6A O 0.4119(5) 0.4845(3) 0.3762(3) 0.0267(12) Uani 1 1 d . . .
H6A H 0.4118 0.4956 0.3282 0.040 Uiso 1 1 calc R . .
N11A N 0.1439(6) 0.3875(4) 0.4034(4) 0.0169(13) Uani 1 1 d . . .
C12A C 0.0962(6) 0.3497(5) 0.3287(4) 0.0166(14) Uani 1 1 d . . .
H12A H 0.0958 0.2864 0.3106 0.020 Uiso 1 1 calc R . .
C13A C 0.0478(6) 0.4006(5) 0.2777(4) 0.0189(15) Uani 1 1 d . . .
C14A C 0.0517(7) 0.4932(5) 0.3033(4) 0.0217(16) Uani 1 1 d . . .
H14A H 0.0244 0.5306 0.2682 0.026 Uiso 1 1 calc R . .
C15A C 0.0955(7) 0.5303(5) 0.3803(5) 0.0231(16) Uani 1 1 d . . .
H15A H 0.0959 0.5933 0.3996 0.028 Uiso 1 1 calc R . .
C16A C 0.1392(6) 0.4760(5) 0.4298(4) 0.0151(14) Uani 1 1 d . . .
C17A C 0.1850(7) 0.5117(5) 0.5141(4) 0.0194(15) Uani 1 1 d . . .
C18A C 0.1830(7) 0.6027(5) 0.5491(4) 0.0217(16) Uani 1 1 d . . .
H18A H 0.1527 0.6435 0.5191 0.026 Uiso 1 1 calc R . .
C19A C 0.2264(7) 0.6310(5) 0.6285(4) 0.0204(15) Uani 1 1 d . . .
H19A H 0.2265 0.6920 0.6536 0.025 Uiso 1 1 calc R . .
C20A C 0.2693(6) 0.5703(5) 0.6706(4) 0.0189(15) Uani 1 1 d . . .
C21A C 0.2678(6) 0.4821(5) 0.6336(4) 0.0173(14) Uani 1 1 d . . .
H21A H 0.2963 0.4401 0.6633 0.021 Uiso 1 1 calc R . .
N22A N 0.2269(6) 0.4536(4) 0.5563(4) 0.0167(13) Uani 1 1 d . . .
N23A N -0.0041(6) 0.3537(4) 0.2020(4) 0.0225(14) Uani 1 1 d . . .
H23A H -0.0297 0.2928 0.1969 0.027 Uiso 1 1 calc R . .
C24A C -0.0174(7) 0.3967(5) 0.1361(5) 0.0222(16) Uani 1 1 d . . .
O25A O 0.0206(6) 0.4775(4) 0.1306(3) 0.0408(15) Uani 1 1 d . . .
O26A O -0.0749(5) 0.3325(4) 0.0747(3) 0.0248(12) Uani 1 1 d . . .
C27A C -0.0815(8) 0.3700(6) -0.0021(5) 0.0288(18) Uani 1 1 d . . .
H27A H 0.0037 0.3913 -0.0215 0.035 Uiso 1 1 calc R . .
H27B H -0.1217 0.4235 0.0055 0.035 Uiso 1 1 calc R . .
C28A C -0.1563(8) 0.2943(6) -0.0619(5) 0.036(2) Uani 1 1 d . . .
H28A H -0.1147 0.2422 -0.0698 0.054 Uiso 1 1 calc R . .
H28B H -0.1634 0.3178 -0.1134 0.054 Uiso 1 1 calc R . .
H28C H -0.2399 0.2730 -0.0417 0.054 Uiso 1 1 calc R . .
C29A C 0.3133(7) 0.6021(5) 0.7575(5) 0.0232(16) Uani 1 1 d . . .
O30A O 0.3392(5) 0.6826(4) 0.7859(3) 0.0287(13) Uani 1 1 d . . .
O31A O 0.3172(6) 0.5306(4) 0.7972(3) 0.0317(13) Uani 1 1 d . . .
C32A C 0.3648(10) 0.5598(7) 0.8814(5) 0.042(2) Uani 1 1 d . . .
H32A H 0.3265 0.6098 0.9074 0.050 Uiso 1 1 calc R . .
H32B H 0.4568 0.5830 0.8836 0.050 Uiso 1 1 calc R . .
C33A C 0.3288(12) 0.4739(7) 0.9229(5) 0.051(3) Uani 1 1 d . . .
H33A H 0.2397 0.4455 0.9119 0.076 Uiso 1 1 calc R . .
H33B H 0.3449 0.4912 0.9812 0.076 Uiso 1 1 calc R . .
H33C H 0.3783 0.4293 0.9025 0.076 Uiso 1 1 calc R . .
PtB Pt 0.26063(2) 0.178120(16) 0.028179(17) 0.01574(12) Uani 1 1 d . . .
BrB Br 0.47206(7) 0.24791(5) -0.02949(4) 0.01969(18) Uani 1 1 d . . .
C1B C 0.1674(8) 0.2264(6) -0.0590(5) 0.0283(18) Uani 1 1 d . . .
H1D H 0.1393 0.2815 -0.0348 0.042 Uiso 1 1 calc R . .
H1E H 0.0949 0.1778 -0.0809 0.042 Uiso 1 1 calc R . .
H1F H 0.2239 0.2429 -0.1025 0.042 Uiso 1 1 calc R . .
C2B C 0.2639(8) 0.3009(6) 0.1019(5) 0.0297(19) Uani 1 1 d . . .
H2D H 0.3492 0.3395 0.1068 0.045 Uiso 1 1 calc R . .
H2E H 0.2360 0.2874 0.1554 0.045 Uiso 1 1 calc R . .
H2F H 0.2079 0.3342 0.0785 0.045 Uiso 1 1 calc R . .
C3B C 0.0840(8) 0.1265(6) 0.0695(6) 0.029(2) Uani 1 1 d . . .
H3C H 0.0404 0.1779 0.0812 0.035 Uiso 1 1 calc R . .
H3D H 0.0344 0.0799 0.0269 0.035 Uiso 1 1 calc R . .
C4B C 0.0923(7) 0.0833(6) 0.1426(5) 0.0295(19) Uani 1 1 d . . .
O5B O 0.1005(6) 0.1235(5) 0.2117(4) 0.0505(18) Uani 1 1 d . . .
O6B O 0.0924(5) -0.0058(4) 0.1268(3) 0.0328(13) Uani 1 1 d . . .
H6B H 0.0943 -0.0281 0.1703 0.049 Uiso 1 1 calc R . .
N11B N 0.3568(6) 0.1153(4) 0.1118(4) 0.0173(13) Uani 1 1 d . . .
C12B C 0.4030(6) 0.1554(5) 0.1850(4) 0.0157(14) Uani 1 1 d . . .
H12B H 0.3967 0.2174 0.2027 0.019 Uiso 1 1 calc R . .
C13B C 0.4600(7) 0.1097(5) 0.2363(5) 0.0218(16) Uani 1 1 d . . .
C14B C 0.4693(7) 0.0197(6) 0.2095(5) 0.0263(17) Uani 1 1 d . . .
H14B H 0.5062 -0.0139 0.2436 0.032 Uiso 1 1 calc R . .
C15B C 0.4242(7) -0.0210(5) 0.1324(5) 0.0236(17) Uani 1 1 d . . .
H15B H 0.4317 -0.0823 0.1128 0.028 Uiso 1 1 calc R . .
C16B C 0.3680(6) 0.0287(5) 0.0842(4) 0.0176(15) Uani 1 1 d . . .
C17B C 0.3173(6) -0.0094(5) 0.0025(4) 0.0172(15) Uani 1 1 d . . .
C18B C 0.3231(6) -0.0993(5) -0.0337(4) 0.0189(15) Uani 1 1 d . . .
H18B H 0.3599 -0.1379 -0.0048 0.023 Uiso 1 1 calc R . .
C19B C 0.2750(7) -0.1308(5) -0.1111(5) 0.0213(16) Uani 1 1 d . . .
H19B H 0.2770 -0.1916 -0.1358 0.026 Uiso 1 1 calc R . .
C20B C 0.2231(6) -0.0722(5) -0.1530(4) 0.0187(15) Uani 1 1 d . . .
C21B C 0.2188(6) 0.0138(5) -0.1145(4) 0.0190(15) Uani 1 1 d . . .
H21B H 0.1822 0.0534 -0.1424 0.023 Uiso 1 1 calc R . .
N22B N 0.2640(5) 0.0441(4) -0.0391(4) 0.0170(13) Uani 1 1 d . . .
N23B N 0.5025(6) 0.1578(4) 0.3127(4) 0.0220(14) Uani 1 1 d . . .
H23B H 0.5049 0.2178 0.3213 0.026 Uiso 1 1 calc R . .
C24B C 0.5407(7) 0.1178(6) 0.3753(5) 0.0280(18) Uani 1 1 d . . .
O25B O 0.5458(7) 0.0390(4) 0.3740(4) 0.056(2) Uani 1 1 d . . .
O26B O 0.5741(5) 0.1837(4) 0.4400(3) 0.0291(13) Uani 1 1 d . . .
C27B C 0.6058(12) 0.1491(7) 0.5134(6) 0.056(3) Uani 1 1 d . . .
H27C H 0.6741 0.1161 0.5032 0.068 Uiso 1 1 calc R . .
H27D H 0.5322 0.1047 0.5299 0.068 Uiso 1 1 calc R . .
C28B C 0.6458(9) 0.2283(7) 0.5784(5) 0.046(2) Uani 1 1 d . . .
H28D H 0.7171 0.2729 0.5611 0.069 Uiso 1 1 calc R . .
H28E H 0.6702 0.2055 0.6271 0.069 Uiso 1 1 calc R . .
H28F H 0.5764 0.2589 0.5901 0.069 Uiso 1 1 calc R . .
C29B C 0.1748(6) -0.1048(5) -0.2374(5) 0.0215(16) Uani 1 1 d . . .
O30B O 0.1455(5) -0.1872(4) -0.2644(3) 0.0304(13) Uani 1 1 d . . .
O31B O 0.1705(5) -0.0351(4) -0.2782(3) 0.0286(13) Uani 1 1 d . . .
C32B C 0.1174(10) -0.0641(6) -0.3612(5) 0.041(2) Uani 1 1 d . . .
H32C H 0.0258 -0.0881 -0.3608 0.050 Uiso 1 1 calc R . .
H32D H 0.1549 -0.1136 -0.3890 0.050 Uiso 1 1 calc R . .
C33B C 0.1481(11) 0.0212(7) -0.4027(6) 0.050(3) Uani 1 1 d . . .
H33D H 0.1086 0.0689 -0.3752 0.075 Uiso 1 1 calc R . .
H33E H 0.1166 0.0053 -0.4590 0.075 Uiso 1 1 calc R . .
H33F H 0.2389 0.0450 -0.4011 0.075 Uiso 1 1 calc R . .
O101 O 0.0421(6) -0.2744(4) 0.2730(4) 0.0554(18) Uani 1 1 d . . .
H10A H 0.0332 -0.2672 0.3231 0.083 Uiso 1 1 calc R . .
C102 C -0.0766(10) -0.3092(7) 0.2327(6) 0.047(2) Uani 1 1 d . . .
H10B H -0.1155 -0.3695 0.2493 0.070 Uiso 1 1 calc R . .
H10C H -0.0663 -0.3169 0.1743 0.070 Uiso 1 1 calc R . .
H10D H -0.1299 -0.2653 0.2467 0.070 Uiso 1 1 calc R . .
O201 O 0.5934(7) 0.7247(4) 0.2147(4) 0.0561(18) Uani 1 1 d . . .
H20A H 0.5708 0.7176 0.1658 0.084 Uiso 1 1 calc R . .
C202 C 0.5833(13) 0.8117(7) 0.2509(6) 0.061(3) Uani 1 1 d . . .
H20B H 0.5975 0.8165 0.3093 0.091 Uiso 1 1 calc R . .
H20C H 0.4994 0.8204 0.2393 0.091 Uiso 1 1 calc R . .
H20D H 0.6457 0.8597 0.2295 0.091 Uiso 1 1 calc R . .
O301 O 0.1320(9) -0.0926(5) 0.2490(5) 0.088(3) Uani 1 1 d . . .
H30A H 0.1029 -0.1490 0.2529 0.131 Uiso 1 1 calc R . .
C302 C 0.1893(11) -0.0472(7) 0.3224(6) 0.049(3) Uani 1 1 d . . .
H30B H 0.2745 -0.0566 0.3261 0.074 Uiso 1 1 calc R . .
H30C H 0.1414 -0.0724 0.3668 0.074 Uiso 1 1 calc R . .
H30D H 0.1923 0.0195 0.3259 0.074 Uiso 1 1 calc R . .
O401 O 0.4350(7) 0.5632(5) 0.2431(4) 0.058(2) Uani 1 1 d . . .
H40A H 0.4855 0.6149 0.2438 0.087 Uiso 1 1 calc R . .
C402 C 0.3321(10) 0.5589(8) 0.1917(7) 0.059(3) Uani 1 1 d . . .
H40B H 0.2820 0.6013 0.2162 0.089 Uiso 1 1 calc R . .
H40C H 0.2808 0.4952 0.1833 0.089 Uiso 1 1 calc R . .
H40D H 0.3614 0.5772 0.1398 0.089 Uiso 1 1 calc R . .

loop_
_atom_site_aniso_label
_atom_site_aniso_U_11
_atom_site_aniso_U_22
_atom_site_aniso_U_33
_atom_site_aniso_U_23
_atom_site_aniso_U_13
_atom_site_aniso_U_12
PtA 0.01389(18) 0.00918(18) 0.01775(18) -0.00224(11) -0.00255(11) 0.00350(12)
BrA 0.0179(4) 0.0169(4) 0.0238(4) 0.0019(3) 0.0013(3) 0.0039(3)
C1A 0.027(4) 0.025(4) 0.015(4) 0.008(3) 0.003(3) 0.015(3)
C2A 0.019(4) 0.020(4) 0.021(4) -0.002(3) -0.002(3) 0.006(3)
C3A 0.024(4) 0.009(3) 0.029(4) 0.000(3) -0.004(3) -0.001(3)
C4A 0.013(3) 0.012(4) 0.036(5) -0.007(3) -0.002(3) -0.002(3)
O5A 0.032(3) 0.027(3) 0.028(3) -0.006(2) 0.004(2) 0.004(2)
O6A 0.028(3) 0.020(3) 0.033(3) 0.008(2) 0.005(2) 0.004(2)
N11A 0.020(3) 0.012(3) 0.020(3) 0.009(2) 0.005(2) 0.003(2)
C12A 0.012(3) 0.013(3) 0.025(4) 0.002(3) -0.004(3) 0.004(3)
C13A 0.013(3) 0.024(4) 0.017(3) 0.001(3) 0.002(3) -0.002(3)
C14A 0.018(4) 0.025(4) 0.022(4) 0.002(3) -0.003(3) 0.006(3)
C15A 0.022(4) 0.018(4) 0.031(4) 0.010(3) 0.002(3) 0.004(3)
C16A 0.010(3) 0.016(3) 0.022(4) 0.004(3) 0.000(3) 0.009(3)
C17A 0.015(3) 0.015(4) 0.029(4) 0.001(3) 0.003(3) 0.006(3)
C18A 0.025(4) 0.013(4) 0.026(4) -0.004(3) 0.002(3) 0.005(3)
C19A 0.024(4) 0.008(3) 0.029(4) -0.005(3) 0.001(3) 0.004(3)
C20A 0.015(3) 0.013(3) 0.025(4) -0.008(3) 0.001(3) 0.001(3)
C21A 0.015(3) 0.013(3) 0.024(4) 0.000(3) -0.001(3) 0.003(3)
N22A 0.015(3) 0.013(3) 0.020(3) -0.003(2) -0.003(2) 0.003(2)
N23A 0.022(3) 0.022(3) 0.018(3) 0.000(3) -0.005(3) -0.004(3)
C24A 0.018(4) 0.023(4) 0.029(4) 0.004(3) -0.003(3) 0.010(3)
O25A 0.066(4) 0.026(3) 0.031(3) 0.011(2) -0.004(3) 0.007(3)
O26A 0.027(3) 0.027(3) 0.019(3) 0.005(2) -0.004(2) 0.003(2)
C27A 0.033(4) 0.033(4) 0.027(4) 0.015(3) -0.007(3) 0.014(4)
C28A 0.030(5) 0.044(5) 0.031(5) 0.003(4) -0.003(4) 0.004(4)
C29A 0.020(4) 0.023(4) 0.025(4) -0.006(3) 0.001(3) 0.007(3)
O30A 0.031(3) 0.018(3) 0.033(3) -0.013(2) -0.003(2) 0.005(2)
O31A 0.039(3) 0.022(3) 0.025(3) -0.004(2) -0.010(2) -0.005(3)
C32A 0.057(6) 0.042(5) 0.023(4) -0.002(4) -0.009(4) 0.010(5)
C33A 0.094(9) 0.039(6) 0.024(5) 0.008(4) -0.006(5) 0.026(6)
PtB 0.01104(18) 0.00958(18) 0.02589(19) -0.00223(12) -0.00196(12) 0.00358(12)
BrB 0.0157(4) 0.0166(4) 0.0262(4) 0.0025(3) -0.0002(3) 0.0028(3)
C1B 0.029(4) 0.026(4) 0.033(4) 0.005(3) -0.005(3) 0.012(4)
C2B 0.022(4) 0.024(4) 0.041(5) -0.002(4) -0.002(4) 0.003(3)
C3B 0.021(4) 0.017(4) 0.047(5) -0.005(4) -0.001(4) 0.005(3)
C4B 0.015(4) 0.037(5) 0.030(5) -0.007(4) 0.007(3) 0.000(3)
O5B 0.039(4) 0.057(4) 0.043(4) -0.012(3) 0.012(3) -0.005(3)
O6B 0.029(3) 0.037(3) 0.030(3) 0.008(3) 0.003(2) 0.002(3)
N11B 0.018(3) 0.014(3) 0.022(3) 0.008(2) 0.006(2) 0.005(3)
C12B 0.012(3) 0.013(3) 0.022(4) 0.001(3) 0.001(3) 0.005(3)
C13B 0.014(3) 0.022(4) 0.027(4) 0.001(3) 0.005(3) 0.001(3)
C14B 0.029(4) 0.031(4) 0.022(4) 0.003(3) -0.001(3) 0.013(3)
C15B 0.021(4) 0.020(4) 0.031(4) 0.005(3) 0.002(3) 0.007(3)
C16B 0.007(3) 0.015(3) 0.031(4) 0.001(3) 0.000(3) 0.005(3)
C17B 0.011(3) 0.007(3) 0.032(4) -0.001(3) 0.002(3) 0.001(3)
C18B 0.016(3) 0.013(3) 0.029(4) 0.002(3) 0.004(3) 0.006(3)
C19B 0.016(4) 0.009(3) 0.034(4) -0.007(3) -0.002(3) -0.004(3)
C20B 0.013(3) 0.010(3) 0.031(4) -0.003(3) 0.002(3) 0.000(3)
C21B 0.009(3) 0.016(3) 0.028(4) -0.003(3) 0.003(3) -0.002(3)
N22B 0.011(3) 0.013(3) 0.025(3) -0.006(2) 0.001(2) 0.005(2)
N23B 0.024(3) 0.019(3) 0.023(3) 0.003(3) -0.001(3) 0.004(3)
C24B 0.023(4) 0.035(5) 0.028(4) 0.005(4) -0.002(3) 0.013(4)
O25B 0.101(6) 0.044(4) 0.034(4) 0.001(3) -0.014(4) 0.040(4)
O26B 0.030(3) 0.030(3) 0.030(3) 0.006(2) -0.004(2) 0.012(2)
C27B 0.088(8) 0.055(6) 0.039(6) 0.010(5) -0.021(5) 0.042(6)
C28B 0.032(5) 0.078(7) 0.028(5) 0.013(5) -0.003(4) 0.008(5)
C29B 0.011(3) 0.019(4) 0.030(4) -0.005(3) 0.005(3) -0.002(3)
O30B 0.035(3) 0.017(3) 0.036(3) -0.008(2) -0.010(3) 0.007(2)
O31B 0.034(3) 0.019(3) 0.028(3) 0.001(2) -0.005(2) -0.002(2)
C32B 0.053(6) 0.035(5) 0.027(5) -0.006(4) -0.013(4) -0.002(4)
C33B 0.080(8) 0.032(5) 0.036(5) 0.011(4) -0.009(5) 0.004(5)
O101 0.065(5) 0.059(4) 0.036(4) 0.007(3) 0.000(3) 0.003(4)
C102 0.050(6) 0.050(6) 0.047(6) 0.019(5) 0.011(5) 0.019(5)
O201 0.065(5) 0.055(4) 0.046(4) 0.012(3) 0.002(4) 0.005(4)
C202 0.112(10) 0.032(5) 0.044(6) 0.008(5) 0.012(6) 0.028(6)
O301 0.149(9) 0.045(4) 0.051(5) 0.019(4) -0.031(5) -0.020(5)
C302 0.065(7) 0.039(5) 0.042(6) 0.006(4) 0.002(5) 0.007(5)
O401 0.049(4) 0.059(5) 0.060(5) 0.030(4) -0.009(3) -0.012(3)
C402 0.050(6) 0.067(7) 0.055(7) 0.009(6) -0.005(5) 0.001(6)

_geom_special_details            
; 
 All esds (except the esd in the dihedral angle between two l.s. planes) 
 are estimated using the full covariance matrix.  The cell esds are taken 
 into account individually in the estimation of esds in distances, angles 
 and torsion angles; correlations between esds in cell parameters are only 
 used when they are defined by crystal symmetry.  An approximate (isotropic) 
 treatment of cell esds is used for estimating esds involving l.s. planes. 
;

loop_
_geom_bond_atom_site_label_1
_geom_bond_atom_site_label_2
_geom_bond_distance
_geom_bond_site_symmetry_2
_geom_bond_publ_flag
PtA C2A 2.057(7) . ?
PtA C1A 2.062(7) . ?
PtA C3A 2.069(8) . ?
PtA N22A 2.167(6) . ?
PtA N11A 2.169(6) . ?
PtA BrA 2.5757(8) . ?
C1A H1A 0.9800 . ?
C1A H1B 0.9800 . ?
C1A H1C 0.9800 . ?
C2A H2A 0.9800 . ?
C2A H2B 0.9800 . ?
C2A H2C 0.9800 . ?
C3A C4A 1.455(11) . ?
C3A H3A 0.9900 . ?
C3A H3B 0.9900 . ?
C4A O5A 1.225(9) . ?
C4A O6A 1.329(9) . ?
O6A H6A 0.8400 . ?
N11A C16A 1.346(9) . ?
N11A C12A 1.350(9) . ?
C12A C13A 1.389(10) . ?
C12A H12A 0.9500 . ?
C13A C14A 1.382(10) . ?
C13A N23A 1.411(9) . ?
C14A C15A 1.370(10) . ?
C14A H14A 0.9500 . ?
C15A C16A 1.384(10) . ?
C15A H15A 0.9500 . ?
C16A C17A 1.481(10) . ?
C17A N22A 1.339(9) . ?
C17A C18A 1.408(10) . ?
C18A C19A 1.385(10) . ?
C18A H18A 0.9500 . ?
C19A C20A 1.374(10) . ?
C19A H19A 0.9500 . ?
C20A C21A 1.374(9) . ?
C20A C29A 1.509(10) . ?
C21A N22A 1.347(9) . ?
C21A H21A 0.9500 . ?
N23A C24A 1.368(10) . ?
N23A H23A 0.8800 . ?
C24A O25A 1.197(9) . ?
C24A O26A 1.352(9) . ?
O26A C27A 1.474(9) . ?
C27A C28A 1.490(11) . ?
C27A H27A 0.9900 . ?
C27A H27B 0.9900 . ?
C28A H28A 0.9800 . ?
C28A H28B 0.9800 . ?
C28A H28C 0.9800 . ?
C29A O30A 1.200(9) . ?
C29A O31A 1.335(10) . ?
O31A C32A 1.473(9) . ?
C32A C33A 1.512(13) . ?
C32A H32A 0.9900 . ?
C32A H32B 0.9900 . ?
C33A H33A 0.9800 . ?
C33A H33B 0.9800 . ?
C33A H33C 0.9800 . ?
PtB C2B 2.060(8) . ?
PtB C1B 2.066(7) . ?
PtB C3B 2.080(8) . ?
PtB N22B 2.167(6) . ?
PtB N11B 2.170(6) . ?
PtB BrB 2.5732(7) . ?
C1B H1D 0.9800 . ?
C1B H1E 0.9800 . ?
C1B H1F 0.9800 . ?
C2B H2D 0.9800 . ?
C2B H2E 0.9800 . ?
C2B H2F 0.9800 . ?
C3B C4B 1.465(12) . ?
C3B H3C 0.9900 . ?
C3B H3D 0.9900 . ?
C4B O5B 1.223(10) . ?
C4B O6B 1.319(10) . ?
O6B H6B 0.8400 . ?
N11B C12B 1.332(9) . ?
N11B C16B 1.345(9) . ?
C12B C13B 1.388(10) . ?
C12B H12B 0.9500 . ?
C13B C14B 1.383(12) . ?
C13B N23B 1.401(10) . ?
C14B C15B 1.388(11) . ?
C14B H14B 0.9500 . ?
C15B C16B 1.390(10) . ?
C15B H15B 0.9500 . ?
C16B C17B 1.464(10) . ?
C17B N22B 1.346(9) . ?
C17B C18B 1.410(9) . ?
C18B C19B 1.376(10) . ?
C18B H18B 0.9500 . ?
C19B C20B 1.397(11) . ?
C19B H19B 0.9500 . ?
C20B C21B 1.368(9) . ?
C20B C29B 1.485(10) . ?
C21B N22B 1.334(9) . ?
C21B H21B 0.9500 . ?
N23B C24B 1.378(10) . ?
N23B H23B 0.8800 . ?
C24B O25B 1.185(10) . ?
C24B O26B 1.350(9) . ?
O26B C27B 1.459(10) . ?
C27B C28B 1.480(13) . ?
C27B H27C 0.9900 . ?
C27B H27D 0.9900 . ?
C28B H28D 0.9800 . ?
C28B H28E 0.9800 . ?
C28B H28F 0.9800 . ?
C29B O30B 1.220(9) . ?
C29B O31B 1.324(9) . ?
O31B C32B 1.473(9) . ?
C32B C33B 1.501(12) . ?
C32B H32C 0.9900 . ?
C32B H32D 0.9900 . ?
C33B H33D 0.9800 . ?
C33B H33E 0.9800 . ?
C33B H33F 0.9800 . ?
O101 C102 1.419(12) . ?
O101 H10A 0.8400 . ?
C102 H10B 0.9800 . ?
C102 H10C 0.9800 . ?
C102 H10D 0.9800 . ?
O201 C202 1.384(11) . ?
O201 H20A 0.8400 . ?
C202 H20B 0.9800 . ?
C202 H20C 0.9800 . ?
C202 H20D 0.9800 . ?
O301 C302 1.391(11) . ?
O301 H30A 0.8400 . ?
C302 H30B 0.9800 . ?
C302 H30C 0.9800 . ?
C302 H30D 0.9800 . ?
O401 C402 1.398(12) . ?
O401 H40A 0.8400 . ?
C402 H40B 0.9800 . ?
C402 H40C 0.9800 . ?
C402 H40D 0.9800 . ?

loop_
_geom_angle_atom_site_label_1
_geom_angle_atom_site_label_2
_geom_angle_atom_site_label_3
_geom_angle
_geom_angle_site_symmetry_1
_geom_angle_site_symmetry_3
_geom_angle_publ_flag
C2A PtA C1A 87.3(3) . . ?
C2A PtA C3A 88.1(3) . . ?
C1A PtA C3A 85.3(3) . . ?
C2A PtA N22A 175.4(3) . . ?
C1A PtA N22A 96.8(3) . . ?
C3A PtA N22A 90.3(3) . . ?
C2A PtA N11A 99.2(3) . . ?
C1A PtA N11A 173.5(3) . . ?
C3A PtA N11A 95.5(3) . . ?
N22A PtA N11A 76.7(2) . . ?
C2A PtA BrA 90.1(2) . . ?
C1A PtA BrA 90.6(2) . . ?
C3A PtA BrA 175.6(2) . . ?
N22A PtA BrA 91.77(16) . . ?
N11A PtA BrA 88.77(16) . . ?
PtA C1A H1A 109.5 . . ?
PtA C1A H1B 109.5 . . ?
H1A C1A H1B 109.5 . . ?
PtA C1A H1C 109.5 . . ?
H1A C1A H1C 109.5 . . ?
H1B C1A H1C 109.5 . . ?
PtA C2A H2A 109.5 . . ?
PtA C2A H2B 109.5 . . ?
H2A C2A H2B 109.5 . . ?
PtA C2A H2C 109.5 . . ?
H2A C2A H2C 109.5 . . ?
H2B C2A H2C 109.5 . . ?
C4A C3A PtA 113.1(5) . . ?
C4A C3A H3A 109.0 . . ?
PtA C3A H3A 109.0 . . ?
C4A C3A H3B 109.0 . . ?
PtA C3A H3B 109.0 . . ?
H3A C3A H3B 107.8 . . ?
O5A C4A O6A 121.9(8) . . ?
O5A C4A C3A 124.3(7) . . ?
O6A C4A C3A 113.8(7) . . ?
C4A O6A H6A 109.5 . . ?
C16A N11A C12A 118.6(6) . . ?
C16A N11A PtA 114.9(5) . . ?
C12A N11A PtA 126.4(5) . . ?
N11A C12A C13A 121.8(6) . . ?
N11A C12A H12A 119.1 . . ?
C13A C12A H12A 119.1 . . ?
C14A C13A C12A 119.0(6) . . ?
C14A C13A N23A 123.5(7) . . ?
C12A C13A N23A 117.5(7) . . ?
C15A C14A C13A 118.9(7) . . ?
C15A C14A H14A 120.6 . . ?
C13A C14A H14A 120.6 . . ?
C14A C15A C16A 119.9(7) . . ?
C14A C15A H15A 120.0 . . ?
C16A C15A H15A 120.0 . . ?
N11A C16A C15A 121.5(7) . . ?
N11A C16A C17A 116.2(6) . . ?
C15A C16A C17A 122.2(6) . . ?
N22A C17A C18A 121.1(7) . . ?
N22A C17A C16A 117.3(6) . . ?
C18A C17A C16A 121.6(7) . . ?
C19A C18A C17A 118.3(7) . . ?
C19A C18A H18A 120.8 . . ?
C17A C18A H18A 120.8 . . ?
C20A C19A C18A 119.6(6) . . ?
C20A C19A H19A 120.2 . . ?
C18A C19A H19A 120.2 . . ?
C19A C20A C21A 119.5(7) . . ?
C19A C20A C29A 118.6(6) . . ?
C21A C20A C29A 121.9(7) . . ?
N22A C21A C20A 121.7(7) . . ?
N22A C21A H21A 119.2 . . ?
C20A C21A H21A 119.2 . . ?
C17A N22A C21A 119.7(6) . . ?
C17A N22A PtA 114.7(5) . . ?
C21A N22A PtA 125.6(5) . . ?
C24A N23A C13A 124.3(6) . . ?
C24A N23A H23A 117.8 . . ?
C13A N23A H23A 117.8 . . ?
O25A C24A O26A 124.1(7) . . ?
O25A C24A N23A 126.6(7) . . ?
O26A C24A N23A 109.3(6) . . ?
C24A O26A C27A 113.7(6) . . ?
O26A C27A C28A 107.8(7) . . ?
O26A C27A H27A 110.1 . . ?
C28A C27A H27A 110.1 . . ?
O26A C27A H27B 110.1 . . ?
C28A C27A H27B 110.1 . . ?
H27A C27A H27B 108.5 . . ?
C27A C28A H28A 109.5 . . ?
C27A C28A H28B 109.5 . . ?
H28A C28A H28B 109.5 . . ?
C27A C28A H28C 109.5 . . ?
H28A C28A H28C 109.5 . . ?
H28B C28A H28C 109.5 . . ?
O30A C29A O31A 125.6(7) . . ?
O30A C29A C20A 122.5(7) . . ?
O31A C29A C20A 111.9(6) . . ?
C29A O31A C32A 113.0(6) . . ?
O31A C32A C33A 105.6(7) . . ?
O31A C32A H32A 110.6 . . ?
C33A C32A H32A 110.6 . . ?
O31A C32A H32B 110.6 . . ?
C33A C32A H32B 110.6 . . ?
H32A C32A H32B 108.7 . . ?
C32A C33A H33A 109.5 . . ?
C32A C33A H33B 109.5 . . ?
H33A C33A H33B 109.5 . . ?
C32A C33A H33C 109.5 . . ?
H33A C33A H33C 109.5 . . ?
H33B C33A H33C 109.5 . . ?
C2B PtB C1B 88.1(3) . . ?
C2B PtB C3B 87.9(3) . . ?
C1B PtB C3B 85.5(3) . . ?
C2B PtB N22B 174.3(3) . . ?
C1B PtB N22B 97.5(3) . . ?
C3B PtB N22B 91.7(3) . . ?
C2B PtB N11B 97.3(3) . . ?
C1B PtB N11B 174.6(3) . . ?
C3B PtB N11B 94.4(3) . . ?
N22B PtB N11B 77.1(2) . . ?
C2B PtB BrB 91.4(2) . . ?
C1B PtB BrB 90.6(2) . . ?
C3B PtB BrB 176.1(2) . . ?
N22B PtB BrB 89.43(16) . . ?
N11B PtB BrB 89.51(16) . . ?
PtB C1B H1D 109.5 . . ?
PtB C1B H1E 109.5 . . ?
H1D C1B H1E 109.5 . . ?
PtB C1B H1F 109.5 . . ?
H1D C1B H1F 109.5 . . ?
H1E C1B H1F 109.5 . . ?
PtB C2B H2D 109.5 . . ?
PtB C2B H2E 109.5 . . ?
H2D C2B H2E 109.5 . . ?
PtB C2B H2F 109.5 . . ?
H2D C2B H2F 109.5 . . ?
H2E C2B H2F 109.5 . . ?
C4B C3B PtB 111.1(5) . . ?
C4B C3B H3C 109.4 . . ?
PtB C3B H3C 109.4 . . ?
C4B C3B H3D 109.4 . . ?
PtB C3B H3D 109.4 . . ?
H3C C3B H3D 108.0 . . ?
O5B C4B O6B 121.9(9) . . ?
O5B C4B C3B 125.3(8) . . ?
O6B C4B C3B 112.8(7) . . ?
C4B O6B H6B 109.5 . . ?
C12B N11B C16B 120.1(6) . . ?
C12B N11B PtB 125.5(5) . . ?
C16B N11B PtB 114.4(5) . . ?
N11B C12B C13B 122.3(6) . . ?
N11B C12B H12B 118.9 . . ?
C13B C12B H12B 118.9 . . ?
C14B C13B C12B 118.2(7) . . ?
C14B C13B N23B 124.4(7) . . ?
C12B C13B N23B 117.4(7) . . ?
C13B C14B C15B 119.4(7) . . ?
C13B C14B H14B 120.3 . . ?
C15B C14B H14B 120.3 . . ?
C14B C15B C16B 119.3(7) . . ?
C14B C15B H15B 120.3 . . ?
C16B C15B H15B 120.3 . . ?
N11B C16B C15B 120.6(7) . . ?
N11B C16B C17B 116.6(6) . . ?
C15B C16B C17B 122.8(6) . . ?
N22B C17B C18B 119.4(7) . . ?
N22B C17B C16B 118.2(6) . . ?
C18B C17B C16B 122.4(6) . . ?
C19B C18B C17B 119.6(7) . . ?
C19B C18B H18B 120.2 . . ?
C17B C18B H18B 120.2 . . ?
C18B C19B C20B 119.2(6) . . ?
C18B C19B H19B 120.4 . . ?
C20B C19B H19B 120.4 . . ?
C21B C20B C19B 118.6(7) . . ?
C21B C20B C29B 122.1(7) . . ?
C19B C20B C29B 119.3(6) . . ?
N22B C21B C20B 122.3(7) . . ?
N22B C21B H21B 118.8 . . ?
C20B C21B H21B 118.8 . . ?
C21B N22B C17B 120.8(6) . . ?
C21B N22B PtB 125.6(5) . . ?
C17B N22B PtB 113.7(5) . . ?
C24B N23B C13B 124.5(7) . . ?
C24B N23B H23B 117.7 . . ?
C13B N23B H23B 117.7 . . ?
O25B C24B O26B 124.4(7) . . ?
O25B C24B N23B 126.8(8) . . ?
O26B C24B N23B 108.8(7) . . ?
C24B O26B C27B 114.7(7) . . ?
O26B C27B C28B 109.3(8) . . ?
O26B C27B H27C 109.8 . . ?
C28B C27B H27C 109.8 . . ?
O26B C27B H27D 109.8 . . ?
C28B C27B H27D 109.8 . . ?
H27C C27B H27D 108.3 . . ?
C27B C28B H28D 109.5 . . ?
C27B C28B H28E 109.5 . . ?
H28D C28B H28E 109.5 . . ?
C27B C28B H28F 109.5 . . ?
H28D C28B H28F 109.5 . . ?
H28E C28B H28F 109.5 . . ?
O30B C29B O31B 125.6(7) . . ?
O30B C29B C20B 122.1(7) . . ?
O31B C29B C20B 112.3(6) . . ?
C29B O31B C32B 114.3(6) . . ?
O31B C32B C33B 106.0(7) . . ?
O31B C32B H32C 110.5 . . ?
C33B C32B H32C 110.5 . . ?
O31B C32B H32D 110.5 . . ?
C33B C32B H32D 110.5 . . ?
H32C C32B H32D 108.7 . . ?
C32B C33B H33D 109.5 . . ?
C32B C33B H33E 109.5 . . ?
H33D C33B H33E 109.5 . . ?
C32B C33B H33F 109.5 . . ?
H33D C33B H33F 109.5 . . ?
H33E C33B H33F 109.5 . . ?
C102 O101 H10A 109.5 . . ?
O101 C102 H10B 109.5 . . ?
O101 C102 H10C 109.5 . . ?
H10B C102 H10C 109.5 . . ?
O101 C102 H10D 109.5 . . ?
H10B C102 H10D 109.5 . . ?
H10C C102 H10D 109.5 . . ?
C202 O201 H20A 109.5 . . ?
O201 C202 H20B 109.5 . . ?
O201 C202 H20C 109.5 . . ?
H20B C202 H20C 109.5 . . ?
O201 C202 H20D 109.5 . . ?
H20B C202 H20D 109.5 . . ?
H20C C202 H20D 109.5 . . ?
C302 O301 H30A 109.5 . . ?
O301 C302 H30B 109.5 . . ?
O301 C302 H30C 109.5 . . ?
H30B C302 H30C 109.5 . . ?
O301 C302 H30D 109.5 . . ?
H30B C302 H30D 109.5 . . ?
H30C C302 H30D 109.5 . . ?
C402 O401 H40A 109.5 . . ?
O401 C402 H40B 109.5 . . ?
O401 C402 H40C 109.5 . . ?
H40B C402 H40C 109.5 . . ?
O401 C402 H40D 109.5 . . ?
H40B C402 H40D 109.5 . . ?
H40C C402 H40D 109.5 . . ?

loop_
_geom_torsion_atom_site_label_1
_geom_torsion_atom_site_label_2
_geom_torsion_atom_site_label_3
_geom_torsion_atom_site_label_4
_geom_torsion
_geom_torsion_site_symmetry_1
_geom_torsion_site_symmetry_2
_geom_torsion_site_symmetry_3
_geom_torsion_site_symmetry_4
_geom_torsion_publ_flag
C2A PtA C3A C4A 77.5(6) . . . . ?
C1A PtA C3A C4A 165.0(6) . . . . ?
N22A PtA C3A C4A -98.2(5) . . . . ?
N11A PtA C3A C4A -21.6(6) . . . . ?
BrA PtA C3A C4A 143(2) . . . . ?
PtA C3A C4A O5A -92.7(8) . . . . ?
PtA C3A C4A O6A 87.5(6) . . . . ?
C2A PtA N11A C16A -174.4(5) . . . . ?
C1A PtA N11A C16A 11(2) . . . . ?
C3A PtA N11A C16A -85.5(5) . . . . ?
N22A PtA N11A C16A 3.6(5) . . . . ?
BrA PtA N11A C16A 95.7(5) . . . . ?
C2A PtA N11A C12A 6.5(6) . . . . ?
C1A PtA N11A C12A -168(2) . . . . ?
C3A PtA N11A C12A 95.4(6) . . . . ?
N22A PtA N11A C12A -175.5(6) . . . . ?
BrA PtA N11A C12A -83.4(6) . . . . ?
C16A N11A C12A C13A 2.8(10) . . . . ?
PtA N11A C12A C13A -178.1(5) . . . . ?
N11A C12A C13A C14A 1.8(11) . . . . ?
N11A C12A C13A N23A -177.7(6) . . . . ?
C12A C13A C14A C15A -4.4(11) . . . . ?
N23A C13A C14A C15A 175.1(7) . . . . ?
C13A C14A C15A C16A 2.4(11) . . . . ?
C12A N11A C16A C15A -4.9(10) . . . . ?
PtA N11A C16A C15A 176.0(5) . . . . ?
C12A N11A C16A C17A 176.0(6) . . . . ?
PtA N11A C16A C17A -3.2(8) . . . . ?
C14A C15A C16A N11A 2.3(11) . . . . ?
C14A C15A C16A C17A -178.6(7) . . . . ?
N11A C16A C17A N22A 0.1(10) . . . . ?
C15A C16A C17A N22A -179.0(7) . . . . ?
N11A C16A C17A C18A -179.0(7) . . . . ?
C15A C16A C17A C18A 1.9(11) . . . . ?
N22A C17A C18A C19A 0.4(11) . . . . ?
C16A C17A C18A C19A 179.4(7) . . . . ?
C17A C18A C19A C20A -0.3(11) . . . . ?
C18A C19A C20A C21A -0.5(11) . . . . ?
C18A C19A C20A C29A -178.6(7) . . . . ?
C19A C20A C21A N22A 1.0(11) . . . . ?
C29A C20A C21A N22A 179.1(7) . . . . ?
C18A C17A N22A C21A 0.1(11) . . . . ?
C16A C17A N22A C21A -178.9(6) . . . . ?
C18A C17A N22A PtA -177.9(5) . . . . ?
C16A C17A N22A PtA 3.1(8) . . . . ?
C20A C21A N22A C17A -0.9(11) . . . . ?
C20A C21A N22A PtA 176.9(5) . . . . ?
C2A PtA N22A C17A 22(3) . . . . ?
C1A PtA N22A C17A 177.4(5) . . . . ?
C3A PtA N22A C17A 92.0(5) . . . . ?
N11A PtA N22A C17A -3.5(5) . . . . ?
BrA PtA N22A C17A -91.8(5) . . . . ?
C2A PtA N22A C21A -156(3) . . . . ?
C1A PtA N22A C21A -0.5(6) . . . . ?
C3A PtA N22A C21A -85.9(6) . . . . ?
N11A PtA N22A C21A 178.6(6) . . . . ?
BrA PtA N22A C21A 90.3(6) . . . . ?
C14A C13A N23A C24A 23.0(11) . . . . ?
C12A C13A N23A C24A -157.5(7) . . . . ?
C13A N23A C24A O25A 6.1(13) . . . . ?
C13A N23A C24A O26A -177.5(6) . . . . ?
O25A C24A O26A C27A 2.9(11) . . . . ?
N23A C24A O26A C27A -173.7(6) . . . . ?
C24A O26A C27A C28A -175.1(7) . . . . ?
C19A C20A C29A O30A -17.3(11) . . . . ?
C21A C20A C29A O30A 164.6(7) . . . . ?
C19A C20A C29A O31A 161.7(7) . . . . ?
C21A C20A C29A O31A -16.4(10) . . . . ?
O30A C29A O31A C32A -3.4(12) . . . . ?
C20A C29A O31A C32A 177.6(7) . . . . ?
C29A O31A C32A C33A 164.2(8) . . . . ?
C2B PtB C3B C4B -88.6(6) . . . . ?
C1B PtB C3B C4B -176.8(6) . . . . ?
N22B PtB C3B C4B 85.8(6) . . . . ?
N11B PtB C3B C4B 8.6(6) . . . . ?
BrB PtB C3B C4B -168(3) . . . . ?
PtB C3B C4B O5B 89.7(9) . . . . ?
PtB C3B C4B O6B -89.1(7) . . . . ?
C2B PtB N11B C12B -2.6(6) . . . . ?
C1B PtB N11B C12B 180(44) . . . . ?
C3B PtB N11B C12B -91.0(6) . . . . ?
N22B PtB N11B C12B 178.3(6) . . . . ?
BrB PtB N11B C12B 88.8(6) . . . . ?
C2B PtB N11B C16B 177.4(5) . . . . ?
C1B PtB N11B C16B 0(3) . . . . ?
C3B PtB N11B C16B 89.0(5) . . . . ?
N22B PtB N11B C16B -1.7(5) . . . . ?
BrB PtB N11B C16B -91.2(5) . . . . ?
C16B N11B C12B C13B -2.1(11) . . . . ?
PtB N11B C12B C13B 177.9(5) . . . . ?
N11B C12B C13B C14B 0.4(11) . . . . ?
N11B C12B C13B N23B -178.5(6) . . . . ?
C12B C13B C14B C15B 1.4(12) . . . . ?
N23B C13B C14B C15B -179.8(7) . . . . ?
C13B C14B C15B C16B -1.5(12) . . . . ?
C12B N11B C16B C15B 2.0(10) . . . . ?
PtB N11B C16B C15B -178.0(5) . . . . ?
C12B N11B C16B C17B -178.6(6) . . . . ?
PtB N11B C16B C17B 1.4(8) . . . . ?
C14B C15B C16B N11B -0.2(11) . . . . ?
C14B C15B C16B C17B -179.6(7) . . . . ?
N11B C16B C17B N22B 0.2(10) . . . . ?
C15B C16B C17B N22B 179.6(7) . . . . ?
N11B C16B C17B C18B 179.9(6) . . . . ?
C15B C16B C17B C18B -0.7(11) . . . . ?
N22B C17B C18B C19B 0.4(10) . . . . ?
C16B C17B C18B C19B -179.3(7) . . . . ?
C17B C18B C19B C20B 1.1(11) . . . . ?
C18B C19B C20B C21B -1.8(11) . . . . ?
C18B C19B C20B C29B 178.0(6) . . . . ?
C19B C20B C21B N22B 1.1(11) . . . . ?
C29B C20B C21B N22B -178.8(6) . . . . ?
C20B C21B N22B C17B 0.4(11) . . . . ?
C20B C21B N22B PtB -179.3(5) . . . . ?
C18B C17B N22B C21B -1.2(10) . . . . ?
C16B C17B N22B C21B 178.5(6) . . . . ?
C18B C17B N22B PtB 178.6(5) . . . . ?
C16B C17B N22B PtB -1.7(8) . . . . ?
C2B PtB N22B C21B 173(3) . . . . ?
C1B PtB N22B C21B 1.7(6) . . . . ?
C3B PtB N22B C21B 87.4(6) . . . . ?
N11B PtB N22B C21B -178.4(6) . . . . ?
BrB PtB N22B C21B -88.8(6) . . . . ?
C2B PtB N22B C17B -7(3) . . . . ?
C1B PtB N22B C17B -178.1(5) . . . . ?
C3B PtB N22B C17B -92.4(5) . . . . ?
N11B PtB N22B C17B 1.8(5) . . . . ?
BrB PtB N22B C17B 91.4(5) . . . . ?
C14B C13B N23B C24B -10.7(12) . . . . ?
C12B C13B N23B C24B 168.1(7) . . . . ?
C13B N23B C24B O25B 1.5(14) . . . . ?
C13B N23B C24B O26B -179.4(6) . . . . ?
O25B C24B O26B C27B -6.3(13) . . . . ?
N23B C24B O26B C27B 174.6(8) . . . . ?
C24B O26B C27B C28B 177.6(8) . . . . ?
C21B C20B C29B O30B -158.8(7) . . . . ?
C19B C20B C29B O30B 21.3(11) . . . . ?
C21B C20B C29B O31B 22.4(10) . . . . ?
C19B C20B C29B O31B -157.4(7) . . . . ?
O30B C29B O31B C32B 4.1(11) . . . . ?
C20B C29B O31B C32B -177.2(7) . . . . ?
C29B O31B C32B C33B -167.0(8) . . . . ?

loop_
_geom_hbond_atom_site_label_D
_geom_hbond_atom_site_label_H
_geom_hbond_atom_site_label_A
_geom_hbond_distance_DH
_geom_hbond_distance_HA
_geom_hbond_distance_DA
_geom_hbond_angle_DHA
_geom_hbond_site_symmetry_A
O6A H6A O401 0.84 1.84 2.637(8) 158.7 .
N23A H23A O30B 0.88 2.23 2.937(9) 137.6 2
O6B H6B O301 0.84 1.82 2.639(9) 163.1 .
N23B H23B O5A 0.88 2.24 3.065(8) 155.5 .
O101 H10A BrA 0.84 2.44 3.276(7) 176.4 2_556
O201 H20A BrB 0.84 2.47 3.272(7) 161.3 2_665
O301 H30A O101 0.84 1.91 2.750(9) 174.2 .
O401 H40A O201 0.84 1.91 2.733(10) 164.6 .

_diffrn_measured_fraction_theta_max 0.952
_diffrn_reflns_theta_full        25.03
_diffrn_measured_fraction_theta_full 0.952
_refine_diff_density_max         4.620
_refine_diff_density_min         -3.167
_refine_diff_density_rms         0.288

#===END

  
data_4
_publ_contact_author_name        'R.J. Puddephatt'
_publ_contact_author_address     
;Department of Chemistry
University of Western Ontario
London, Canada N6A 5B7
;
_publ_contact_author_email       pudd@uwo.ca
_publ_contact_author_phone       519-661-2111
_publ_contact_author_fax         519-611-3022
loop_
_publ_author_name
_publ_author_address
'Puddephatt, R.J.'
;Department of Chemistry
University of Western Ontario
London, Canada N6A 5B7
;

_audit_creation_method           SHELXL-97
_chemical_name_systematic        
; 
 ? 
;
_chemical_name_common            ?
_chemical_melting_point          ?
_chemical_formula_moiety         ?
_chemical_formula_sum            'C32 H42 Br N3 O8 Pt'
_chemical_formula_weight         871.69

loop_
_atom_type_symbol
_atom_type_description
_atom_type_scat_dispersion_real
_atom_type_scat_dispersion_imag
_atom_type_scat_source
C C 0.0033 0.0016 'International Tables Vol C Tables 4.2.6.8 and 6.1.1.4'
H H 0.0000 0.0000 'International Tables Vol C Tables 4.2.6.8 and 6.1.1.4'
N N 0.0061 0.0033 'International Tables Vol C Tables 4.2.6.8 and 6.1.1.4'
O O 0.0106 0.0060 'International Tables Vol C Tables 4.2.6.8 and 6.1.1.4'
Br Br -0.2901 2.4595 'International Tables Vol C Tables 4.2.6.8 and 6.1.1.4'
Pt Pt -1.7033 8.3905 'International Tables Vol C Tables 4.2.6.8 and 6.1.1.4'

_symmetry_cell_setting           Triclinic
_symmetry_space_group_name_H-M   P-1

loop_
_symmetry_equiv_pos_as_xyz
'x, y, z'
'-x, -y, -z'

_cell_length_a                   6.9797(15)
_cell_length_b                   14.712(3)
_cell_length_c                   17.802(3)
_cell_angle_alpha                108.773(10)
_cell_angle_beta                 94.761(10)
_cell_angle_gamma                90.686(11)
_cell_volume                     1723.3(6)
_cell_formula_units_Z            2
_cell_measurement_temperature    150(2)
_cell_measurement_reflns_used    11965
_cell_measurement_theta_min      1.70
_cell_measurement_theta_max      25.03

_exptl_crystal_description       needle
_exptl_crystal_colour            colourless
_exptl_crystal_size_max          0.63
_exptl_crystal_size_mid          0.30
_exptl_crystal_size_min          0.05
_exptl_crystal_density_meas      ?
_exptl_crystal_density_diffrn    1.680
_exptl_crystal_density_method    'not measured'
_exptl_crystal_F_000             864
_exptl_absorpt_coefficient_mu    5.282
_exptl_absorpt_correction_type   multi-scan
_exptl_absorpt_correction_T_min  0.1369
_exptl_absorpt_correction_T_max  0.7781
_exptl_absorpt_process_details   'DENZO-SMN (Otwinowski & Minor, 1997)'

_exptl_special_details           
; 
 ? 
;

_diffrn_ambient_temperature      150(2)
_diffrn_radiation_wavelength     0.71073
_diffrn_radiation_type           MoK\a
_diffrn_radiation_source         'fine-focus sealed tube'
_diffrn_radiation_monochromator  graphite
_diffrn_measurement_device_type  'Nonius Kappa-CCD'
_diffrn_measurement_method       '\f scans, and \w scans with \k offsets'
_diffrn_detector_area_resol_mean ?
_diffrn_standards_number         0
_diffrn_standards_interval_count ?
_diffrn_standards_interval_time  ?
_diffrn_standards_decay_%        ?
_diffrn_reflns_number            7260
_diffrn_reflns_av_R_equivalents  0.1070
_diffrn_reflns_av_sigmaI/netI    0.1542
_diffrn_reflns_limit_h_min       -6
_diffrn_reflns_limit_h_max       6
_diffrn_reflns_limit_k_min       -14
_diffrn_reflns_limit_k_max       14
_diffrn_reflns_limit_l_min       -17
_diffrn_reflns_limit_l_max       15
_diffrn_reflns_theta_min         2.78
_diffrn_reflns_theta_max         20.81
_reflns_number_total             3365
_reflns_number_gt                2393
_reflns_threshold_expression     I>2\s(I)

_computing_data_collection       'COLLECT (Nonius, 1997-2001)'
_computing_cell_refinement       'DENZO-SMN (Otwinowski & Minor, 1997)'
_computing_data_reduction        DENZO-SMN
_computing_structure_solution    'SHELXS-97 (Sheldrick, 1997)'
_computing_structure_refinement  'SHELXL-97 (Sheldrick, 1997)'
_computing_molecular_graphics    'SHELXTL/PC (Sheldrick, 2001)'
_computing_publication_material  SHELXTL/PC

_refine_special_details          
; 
 Refinement of F^2^ against ALL reflections.  The weighted R-factor wR and 
 goodness of fit S are based on F^2^, conventional R-factors R are based 
 on F, with F set to zero for negative F^2^. The threshold expression of 
 F^2^ > 2sigma(F^2^) is used only for calculating R-factors(gt) etc. and is 
 not relevant to the choice of reflections for refinement.  R-factors based 
 on F^2^ are statistically about twice as large as those based on F, and R- 
 factors based on ALL data will be even larger. 
;

_refine_ls_structure_factor_coef Fsqd
_refine_ls_matrix_type           full
_refine_ls_weighting_scheme      calc
_refine_ls_weighting_details     
'calc w=1/[\s^2^(Fo^2^)+(0.0677P)^2^+60.1855P] where P=(Fo^2^+2Fc^2^)/3'
_atom_sites_solution_primary     direct
_atom_sites_solution_secondary   difmap
_atom_sites_solution_hydrogens   geom
_refine_ls_hydrogen_treatment    constr
_refine_ls_extinction_method     none
_refine_ls_extinction_coef       ?
_refine_ls_number_reflns         3365
_refine_ls_number_parameters     407
_refine_ls_number_restraints     356
_refine_ls_R_factor_all          0.1278
_refine_ls_R_factor_gt           0.0866
_refine_ls_wR_factor_ref         0.2046
_refine_ls_wR_factor_gt          0.1845
_refine_ls_goodness_of_fit_ref   1.064
_refine_ls_restrained_S_all      1.009
_refine_ls_shift/su_max          0.000
_refine_ls_shift/su_mean         0.000

loop_
_atom_site_label
_atom_site_type_symbol
_atom_site_fract_x
_atom_site_fract_y
_atom_site_fract_z
_atom_site_U_iso_or_equiv
_atom_site_adp_type
_atom_site_occupancy
_atom_site_symmetry_multiplicity
_atom_site_calc_flag
_atom_site_refinement_flags
_atom_site_disorder_assembly
_atom_site_disorder_group
Pt Pt 0.01113(15) 0.27273(7) 0.96826(6) 0.0256(4) Uani 1 1 d U . .
Br Br 0.3230(4) 0.21855(17) 1.02770(15) 0.0334(7) Uani 1 1 d U . .
C1 C 0.033(4) 0.3987(15) 1.0562(13) 0.031(5) Uani 1 1 d U . .
H1A H -0.0750 0.4380 1.0487 0.046 Uiso 1 1 calc R . .
H1B H 0.1543 0.4323 1.0555 0.046 Uiso 1 1 calc R . .
H1C H 0.0296 0.3876 1.1075 0.046 Uiso 1 1 calc R . .
C2 C 0.164(4) 0.3401(16) 0.9071(14) 0.031(5) Uani 1 1 d U . .
H2A H 0.0748 0.3695 0.8770 0.047 Uiso 1 1 calc R . .
H2B H 0.2393 0.2932 0.8702 0.047 Uiso 1 1 calc R . .
H2C H 0.2506 0.3901 0.9447 0.047 Uiso 1 1 calc R . .
N11 N -0.036(3) 0.1300(12) 0.8794(11) 0.024(3) Uani 1 1 d U . .
C12 C 0.007(4) 0.1046(17) 0.8050(15) 0.033(5) Uani 1 1 d U . .
H12A H 0.0744 0.1503 0.7884 0.039 Uiso 1 1 calc R . .
C13 C -0.039(3) 0.0150(18) 0.7501(14) 0.030(5) Uani 1 1 d U . .
C14 C -0.131(3) -0.0502(19) 0.7749(15) 0.036(5) Uani 1 1 d U . .
H14A H -0.1653 -0.1122 0.7383 0.043 Uiso 1 1 calc R . .
C15 C -0.175(3) -0.0279(17) 0.8522(15) 0.034(5) Uani 1 1 d U . .
H15A H -0.2395 -0.0733 0.8699 0.041 Uiso 1 1 calc R . .
C16 C -0.120(3) 0.0640(17) 0.9039(14) 0.030(5) Uani 1 1 d U . .
C17 C -0.174(3) 0.0969(17) 0.9888(14) 0.027(4) Uani 1 1 d U . .
C18 C -0.256(3) 0.0412(18) 1.0272(14) 0.033(5) Uani 1 1 d U . .
H18A H -0.2797 -0.0254 0.9993 0.040 Uiso 1 1 calc R . .
C19 C -0.304(3) 0.0757(18) 1.1014(15) 0.031(5) Uani 1 1 d U . .
H19A H -0.3602 0.0349 1.1263 0.038 Uiso 1 1 calc R . .
C20 C -0.268(4) 0.1789(18) 1.1441(15) 0.034(5) Uani 1 1 d U . .
C21 C -0.185(3) 0.2310(18) 1.1014(15) 0.029(5) Uani 1 1 d U . .
H21A H -0.1552 0.2976 1.1274 0.035 Uiso 1 1 calc R . .
N22 N -0.144(3) 0.1931(13) 1.0269(11) 0.026(3) Uani 1 1 d U . .
C23 C -0.008(4) 0.0022(18) 0.6651(15) 0.029(5) Uani 1 1 d U . .
O24 O 0.053(3) 0.0634(13) 0.6415(10) 0.049(5) Uani 1 1 d U . .
O25 O -0.054(2) -0.0875(11) 0.6166(9) 0.040(4) Uani 1 1 d U . .
C26 C -0.040(4) -0.104(2) 0.5300(15) 0.058(8) Uani 1 1 d U . .
H26A H 0.0919 -0.0886 0.5205 0.070 Uiso 1 1 calc R . .
H26B H -0.1306 -0.0638 0.5105 0.070 Uiso 1 1 calc R . .
C27 C -0.092(4) -0.210(2) 0.4875(17) 0.070(10) Uani 1 1 d U . .
H27A H -0.0878 -0.2237 0.4300 0.104 Uiso 1 1 calc R . .
H27B H -0.2218 -0.2246 0.4985 0.104 Uiso 1 1 calc R . .
H27C H 0.0004 -0.2489 0.5065 0.104 Uiso 1 1 calc R . .
N28 N -0.315(3) 0.2259(14) 1.2204(12) 0.034(5) Uani 1 1 d U . .
H28A H -0.3164 0.2889 1.2349 0.041 Uiso 1 1 calc R . .
C29 C -0.361(4) 0.185(2) 1.2765(16) 0.036(5) Uani 1 1 d U . .
O30 O -0.365(3) 0.1015(13) 1.2681(11) 0.051(5) Uani 1 1 d U . .
O31 O -0.381(2) 0.2576(12) 1.3447(10) 0.044(4) Uani 1 1 d U . .
C32 C -0.424(4) 0.2242(19) 1.4107(15) 0.042(6) Uani 1 1 d U . .
H32A H -0.3262 0.1799 1.4199 0.050 Uiso 1 1 calc R . .
H32B H -0.5525 0.1907 1.3999 0.050 Uiso 1 1 calc R . .
C33 C -0.420(4) 0.316(2) 1.4820(15) 0.060(8) Uani 1 1 d U . .
H33A H -0.4495 0.2993 1.5292 0.090 Uiso 1 1 calc R . .
H33B H -0.5165 0.3588 1.4712 0.090 Uiso 1 1 calc R . .
H33C H -0.2923 0.3474 1.4916 0.090 Uiso 1 1 calc R . .
C34 C -0.249(3) 0.3278(16) 0.9298(13) 0.028(4) Uani 1 1 d U . .
H34A H -0.3520 0.3243 0.9641 0.033 Uiso 1 1 calc R . .
H34B H -0.2276 0.3958 0.9336 0.033 Uiso 1 1 calc R . .
C35 C -0.309(3) 0.2672(16) 0.8437(14) 0.025(5) Uani 1 1 d U . .
C37 C -0.438(3) 0.1863(16) 0.8276(14) 0.026(5) Uani 1 1 d U . .
H37A H -0.4949 0.1738 0.8701 0.031 Uiso 1 1 calc R . .
C38 C -0.479(3) 0.1266(17) 0.7513(14) 0.029(5) Uani 1 1 d U . .
H38A H -0.5528 0.0684 0.7408 0.035 Uiso 1 1 calc R . .
C39 C -0.412(3) 0.1521(18) 0.6887(14) 0.030(5) Uani 1 1 d U . .
C40 C -0.300(3) 0.2353(17) 0.7040(15) 0.032(5) Uani 1 1 d U . .
H40A H -0.2596 0.2516 0.6601 0.039 Uiso 1 1 calc R . .
C41 C -0.244(3) 0.2965(17) 0.7808(14) 0.029(5) Uani 1 1 d U . .
H41A H -0.1682 0.3538 0.7906 0.035 Uiso 1 1 calc R . .
C42 C -0.450(4) 0.0892(19) 0.6053(15) 0.037(6) Uani 1 1 d U . .
O43 O -0.428(3) 0.1140(12) 0.5456(10) 0.047(5) Uani 1 1 d U . .
O44 O -0.512(3) 0.0020(12) 0.5962(9) 0.041(5) Uani 1 1 d U . .
H44A H -0.4682 -0.0366 0.5561 0.062 Uiso 1 1 calc R . .
C51 C -0.282(4) 0.5994(18) 1.2869(18) 0.062(9) Uani 1 1 d U . .
H51A H -0.1947 0.6013 1.3334 0.093 Uiso 1 1 calc R . .
H51B H -0.4005 0.6313 1.3046 0.093 Uiso 1 1 calc R . .
H51C H -0.2199 0.6324 1.2550 0.093 Uiso 1 1 calc R . .
C52 C -0.329(4) 0.499(2) 1.2383(16) 0.042(7) Uani 1 1 d U . .
C53 C -0.458(4) 0.483(2) 1.1660(16) 0.053(8) Uani 1 1 d U . .
H53A H -0.4768 0.4141 1.1379 0.079 Uiso 1 1 calc R . .
H53B H -0.4004 0.5140 1.1313 0.079 Uiso 1 1 calc R . .
H53C H -0.5818 0.5111 1.1800 0.079 Uiso 1 1 calc R . .
O54 O -0.265(3) 0.4290(13) 1.2546(11) 0.059(6) Uani 1 1 d U . .
C61 C 0.079(6) 0.448(3) 1.4010(19) 0.113(13) Uani 1 1 d U . .
H61A H 0.0643 0.5155 1.4331 0.169 Uiso 1 1 calc R . .
H61B H 0.1588 0.4167 1.4324 0.169 Uiso 1 1 calc R . .
H61C H -0.0476 0.4153 1.3855 0.169 Uiso 1 1 calc R . .
C62 C 0.172(6) 0.445(3) 1.330(2) 0.090(10) Uani 1 1 d U . .
C63 C 0.207(5) 0.348(3) 1.273(2) 0.086(10) Uani 1 1 d U . .
H63A H 0.2725 0.3556 1.2283 0.129 Uiso 1 1 calc R . .
H63B H 0.0839 0.3125 1.2521 0.129 Uiso 1 1 calc R . .
H63C H 0.2879 0.3125 1.3003 0.129 Uiso 1 1 calc R . .
O64 O 0.212(4) 0.517(2) 1.3104(19) 0.125(10) Uani 1 1 d U . .

loop_
_atom_site_aniso_label
_atom_site_aniso_U_11
_atom_site_aniso_U_22
_atom_site_aniso_U_33
_atom_site_aniso_U_23
_atom_site_aniso_U_13
_atom_site_aniso_U_12
Pt 0.0200(6) 0.0239(6) 0.0308(6) 0.0069(5) -0.0015(4) -0.0033(4)
Br 0.0253(16) 0.0313(16) 0.0442(17) 0.0151(13) -0.0046(13) -0.0012(12)
C1 0.045(16) 0.020(8) 0.029(11) 0.010(7) 0.004(9) 0.003(8)
C2 0.043(13) 0.018(11) 0.030(12) 0.004(9) 0.004(11) 0.003(10)
N11 0.023(11) 0.016(6) 0.035(7) 0.011(6) -0.005(7) 0.007(6)
C12 0.032(14) 0.024(10) 0.040(9) 0.009(7) 0.000(11) 0.006(10)
C13 0.018(13) 0.037(11) 0.030(8) 0.007(6) -0.013(10) -0.003(10)
C14 0.014(14) 0.040(12) 0.042(10) 0.003(9) -0.016(11) -0.014(11)
C15 0.031(14) 0.030(10) 0.039(10) 0.014(8) -0.023(11) -0.018(11)
C16 0.021(13) 0.028(8) 0.038(9) 0.009(6) -0.009(10) -0.008(10)
C17 0.009(12) 0.033(9) 0.040(9) 0.016(7) -0.010(10) -0.009(10)
C18 0.030(14) 0.029(10) 0.036(11) 0.005(8) -0.002(11) -0.012(11)
C19 0.012(13) 0.037(9) 0.047(11) 0.013(8) 0.013(11) 0.005(11)
C20 0.025(13) 0.037(10) 0.040(10) 0.010(7) 0.007(11) -0.001(11)
C21 0.023(14) 0.032(10) 0.041(10) 0.023(8) 0.002(10) 0.013(10)
N22 0.022(8) 0.032(8) 0.027(8) 0.016(6) -0.016(8) -0.001(8)
C23 0.028(14) 0.023(10) 0.035(8) 0.009(7) -0.016(11) 0.007(11)
O24 0.067(14) 0.040(10) 0.042(11) 0.014(9) 0.008(10) -0.003(10)
O25 0.038(11) 0.034(8) 0.040(8) -0.001(7) 0.008(9) -0.002(8)
C26 0.050(17) 0.073(16) 0.036(9) -0.005(11) 0.007(14) -0.008(15)
C27 0.05(2) 0.081(18) 0.051(16) -0.015(13) -0.005(16) -0.016(18)
N28 0.040(12) 0.027(10) 0.042(9) 0.019(7) 0.009(10) 0.017(10)
C29 0.030(14) 0.043(10) 0.044(10) 0.027(8) -0.003(12) 0.010(13)
O30 0.058(13) 0.042(9) 0.065(13) 0.032(9) 0.011(11) 0.004(11)
O31 0.041(11) 0.050(10) 0.049(8) 0.022(7) 0.015(9) 0.007(9)
C32 0.031(15) 0.050(15) 0.047(11) 0.023(9) -0.002(13) -0.022(13)
C33 0.07(2) 0.069(18) 0.037(11) 0.020(11) -0.006(16) -0.020(18)
C34 0.036(10) 0.016(10) 0.035(9) 0.014(8) 0.005(8) 0.011(8)
C35 0.027(12) 0.020(11) 0.037(8) 0.022(8) -0.003(8) 0.008(8)
C37 0.022(13) 0.027(12) 0.035(9) 0.017(9) 0.007(10) 0.009(8)
C38 0.027(14) 0.030(12) 0.037(9) 0.020(9) -0.002(11) -0.001(10)
C39 0.012(12) 0.041(11) 0.034(8) 0.010(8) -0.003(10) -0.009(9)
C40 0.035(15) 0.030(12) 0.035(9) 0.014(9) 0.004(11) -0.002(9)
C41 0.027(14) 0.030(12) 0.033(9) 0.016(8) 0.002(11) -0.001(9)
C42 0.043(16) 0.031(11) 0.034(8) 0.007(9) -0.004(13) 0.005(11)
O43 0.056(13) 0.044(11) 0.040(9) 0.013(9) -0.002(10) -0.005(10)
O44 0.060(13) 0.029(9) 0.031(11) 0.001(7) 0.017(9) 0.009(9)
C51 0.07(2) 0.035(10) 0.07(2) 0.002(13) -0.010(16) 0.005(15)
C52 0.042(17) 0.036(11) 0.048(15) 0.011(11) 0.005(11) -0.007(13)
C53 0.05(2) 0.056(18) 0.054(17) 0.023(13) -0.001(12) -0.019(14)
O54 0.082(16) 0.039(10) 0.053(12) 0.012(10) 0.000(11) 0.004(11)
C61 0.11(3) 0.19(4) 0.05(2) 0.04(2) -0.019(17) -0.01(3)
C62 0.08(2) 0.12(2) 0.08(2) 0.043(17) 0.002(18) 0.00(2)
C63 0.05(2) 0.12(2) 0.09(2) 0.047(19) -0.010(19) 0.01(2)
O64 0.12(2) 0.12(2) 0.15(3) 0.059(19) 0.03(2) -0.01(2)

_geom_special_details            
; 
 All esds (except the esd in the dihedral angle between two l.s. planes) 
 are estimated using the full covariance matrix.  The cell esds are taken 
 into account individually in the estimation of esds in distances, angles 
 and torsion angles; correlations between esds in cell parameters are only 
 used when they are defined by crystal symmetry.  An approximate (isotropic) 
 treatment of cell esds is used for estimating esds involving l.s. planes. 
;

loop_
_geom_bond_atom_site_label_1
_geom_bond_atom_site_label_2
_geom_bond_distance
_geom_bond_site_symmetry_2
_geom_bond_publ_flag
Pt C1 2.00(2) . ?
Pt C2 2.04(2) . ?
Pt N22 2.14(2) . ?
Pt C34 2.15(2) . ?
Pt N11 2.186(18) . ?
Pt Br 2.587(3) . ?
C1 H1A 0.9800 . ?
C1 H1B 0.9800 . ?
C1 H1C 0.9800 . ?
C2 H2A 0.9800 . ?
C2 H2B 0.9800 . ?
C2 H2C 0.9800 . ?
N11 C12 1.32(3) . ?
N11 C16 1.33(3) . ?
C12 C13 1.38(3) . ?
C12 H12A 0.9500 . ?
C13 C14 1.35(3) . ?
C13 C23 1.50(3) . ?
C14 C15 1.37(3) . ?
C14 H14A 0.9500 . ?
C15 C16 1.40(3) . ?
C15 H15A 0.9500 . ?
C16 C17 1.51(3) . ?
C17 N22 1.36(3) . ?
C17 C18 1.37(3) . ?
C18 C19 1.33(3) . ?
C18 H18A 0.9500 . ?
C19 C20 1.47(3) . ?
C19 H19A 0.9500 . ?
C20 N28 1.38(3) . ?
C20 C21 1.39(3) . ?
C21 N22 1.32(3) . ?
C21 H21A 0.9500 . ?
C23 O24 1.20(3) . ?
C23 O25 1.34(3) . ?
O25 C26 1.49(3) . ?
C26 C27 1.51(4) . ?
C26 H26A 0.9900 . ?
C26 H26B 0.9900 . ?
C27 H27A 0.9800 . ?
C27 H27B 0.9800 . ?
C27 H27C 0.9800 . ?
N28 C29 1.38(3) . ?
N28 H28A 0.8800 . ?
C29 O30 1.18(3) . ?
C29 O31 1.36(3) . ?
O31 C32 1.46(3) . ?
C32 C33 1.52(3) . ?
C32 H32A 0.9900 . ?
C32 H32B 0.9900 . ?
C33 H33A 0.9800 . ?
C33 H33B 0.9800 . ?
C33 H33C 0.9800 . ?
C34 C35 1.53(3) . ?
C34 H34A 0.9900 . ?
C34 H34B 0.9900 . ?
C35 C37 1.42(3) . ?
C35 C41 1.43(3) . ?
C37 C38 1.37(3) . ?
C37 H37A 0.9500 . ?
C38 C39 1.40(3) . ?
C38 H38A 0.9500 . ?
C39 C40 1.38(3) . ?
C39 C42 1.48(3) . ?
C40 C41 1.39(3) . ?
C40 H40A 0.9500 . ?
C41 H41A 0.9500 . ?
C42 O43 1.25(3) . ?
C42 O44 1.30(3) . ?
O44 H44A 0.8400 . ?
C51 C52 1.47(4) . ?
C51 H51A 0.9800 . ?
C51 H51B 0.9800 . ?
C51 H51C 0.9800 . ?
C52 O54 1.23(3) . ?
C52 C53 1.46(4) . ?
C53 H53A 0.9800 . ?
C53 H53B 0.9800 . ?
C53 H53C 0.9800 . ?
C61 C62 1.46(5) . ?
C61 H61A 0.9800 . ?
C61 H61B 0.9800 . ?
C61 H61C 0.9800 . ?
C62 O64 1.24(4) . ?
C62 C63 1.50(5) . ?
C63 H63A 0.9800 . ?
C63 H63B 0.9800 . ?
C63 H63C 0.9800 . ?

loop_
_geom_angle_atom_site_label_1
_geom_angle_atom_site_label_2
_geom_angle_atom_site_label_3
_geom_angle
_geom_angle_site_symmetry_1
_geom_angle_site_symmetry_3
_geom_angle_publ_flag
C1 Pt C2 85.9(10) . . ?
C1 Pt N22 97.8(9) . . ?
C2 Pt N22 176.1(8) . . ?
C1 Pt C34 84.1(9) . . ?
C2 Pt C34 89.7(9) . . ?
N22 Pt C34 91.8(8) . . ?
C1 Pt N11 173.6(9) . . ?
C2 Pt N11 100.4(8) . . ?
N22 Pt N11 76.0(7) . . ?
C34 Pt N11 94.5(8) . . ?
C1 Pt Br 90.7(7) . . ?
C2 Pt Br 91.7(7) . . ?
N22 Pt Br 87.1(5) . . ?
C34 Pt Br 174.5(6) . . ?
N11 Pt Br 90.5(5) . . ?
Pt C1 H1A 109.5 . . ?
Pt C1 H1B 109.5 . . ?
H1A C1 H1B 109.5 . . ?
Pt C1 H1C 109.5 . . ?
H1A C1 H1C 109.5 . . ?
H1B C1 H1C 109.5 . . ?
Pt C2 H2A 109.5 . . ?
Pt C2 H2B 109.5 . . ?
H2A C2 H2B 109.5 . . ?
Pt C2 H2C 109.5 . . ?
H2A C2 H2C 109.5 . . ?
H2B C2 H2C 109.5 . . ?
C12 N11 C16 118(2) . . ?
C12 N11 Pt 126.3(16) . . ?
C16 N11 Pt 115.6(16) . . ?
N11 C12 C13 123(2) . . ?
N11 C12 H12A 118.3 . . ?
C13 C12 H12A 118.3 . . ?
C14 C13 C12 118(2) . . ?
C14 C13 C23 125(2) . . ?
C12 C13 C23 117(2) . . ?
C13 C14 C15 121(2) . . ?
C13 C14 H14A 119.6 . . ?
C15 C14 H14A 119.6 . . ?
C14 C15 C16 117(2) . . ?
C14 C15 H15A 121.3 . . ?
C16 C15 H15A 121.3 . . ?
N11 C16 C15 122(2) . . ?
N11 C16 C17 116(2) . . ?
C15 C16 C17 121(2) . . ?
N22 C17 C18 119(2) . . ?
N22 C17 C16 114(2) . . ?
C18 C17 C16 127(2) . . ?
C19 C18 C17 123(2) . . ?
C19 C18 H18A 118.4 . . ?
C17 C18 H18A 118.4 . . ?
C18 C19 C20 118(2) . . ?
C18 C19 H19A 120.9 . . ?
C20 C19 H19A 120.9 . . ?
N28 C20 C21 120(2) . . ?
N28 C20 C19 125(2) . . ?
C21 C20 C19 115(2) . . ?
N22 C21 C20 124(2) . . ?
N22 C21 H21A 118.2 . . ?
C20 C21 H21A 118.2 . . ?
C21 N22 C17 120(2) . . ?
C21 N22 Pt 122.0(16) . . ?
C17 N22 Pt 117.2(16) . . ?
O24 C23 O25 122(2) . . ?
O24 C23 C13 125(2) . . ?
O25 C23 C13 113(2) . . ?
C23 O25 C26 116(2) . . ?
O25 C26 C27 107(2) . . ?
O25 C26 H26A 110.4 . . ?
C27 C26 H26A 110.4 . . ?
O25 C26 H26B 110.4 . . ?
C27 C26 H26B 110.4 . . ?
H26A C26 H26B 108.6 . . ?
C26 C27 H27A 109.5 . . ?
C26 C27 H27B 109.5 . . ?
H27A C27 H27B 109.5 . . ?
C26 C27 H27C 109.5 . . ?
H27A C27 H27C 109.5 . . ?
H27B C27 H27C 109.5 . . ?
C20 N28 C29 127(2) . . ?
C20 N28 H28A 116.5 . . ?
C29 N28 H28A 116.5 . . ?
O30 C29 O31 127(3) . . ?
O30 C29 N28 126(3) . . ?
O31 C29 N28 107(2) . . ?
C29 O31 C32 113(2) . . ?
O31 C32 C33 104(2) . . ?
O31 C32 H32A 110.9 . . ?
C33 C32 H32A 110.9 . . ?
O31 C32 H32B 110.9 . . ?
C33 C32 H32B 110.9 . . ?
H32A C32 H32B 108.9 . . ?
C32 C33 H33A 109.5 . . ?
C32 C33 H33B 109.5 . . ?
H33A C33 H33B 109.5 . . ?
C32 C33 H33C 109.5 . . ?
H33A C33 H33C 109.5 . . ?
H33B C33 H33C 109.5 . . ?
C35 C34 Pt 108.1(14) . . ?
C35 C34 H34A 110.1 . . ?
Pt C34 H34A 110.1 . . ?
C35 C34 H34B 110.1 . . ?
Pt C34 H34B 110.1 . . ?
H34A C34 H34B 108.4 . . ?
C37 C35 C41 121(2) . . ?
C37 C35 C34 119(2) . . ?
C41 C35 C34 119(2) . . ?
C38 C37 C35 120(2) . . ?
C38 C37 H37A 120.0 . . ?
C35 C37 H37A 120.0 . . ?
C37 C38 C39 119(2) . . ?
C37 C38 H38A 120.4 . . ?
C39 C38 H38A 120.4 . . ?
C40 C39 C38 121(2) . . ?
C40 C39 C42 118(2) . . ?
C38 C39 C42 121(2) . . ?
C39 C40 C41 123(2) . . ?
C39 C40 H40A 118.5 . . ?
C41 C40 H40A 118.5 . . ?
C40 C41 C35 115(2) . . ?
C40 C41 H41A 122.3 . . ?
C35 C41 H41A 122.3 . . ?
O43 C42 O44 120(2) . . ?
O43 C42 C39 125(2) . . ?
O44 C42 C39 115(2) . . ?
C42 O44 H44A 109.5 . . ?
C52 C51 H51A 109.5 . . ?
C52 C51 H51B 109.5 . . ?
H51A C51 H51B 109.5 . . ?
C52 C51 H51C 109.5 . . ?
H51A C51 H51C 109.5 . . ?
H51B C51 H51C 109.5 . . ?
O54 C52 C53 119(3) . . ?
O54 C52 C51 124(3) . . ?
C53 C52 C51 116(3) . . ?
C52 C53 H53A 109.5 . . ?
C52 C53 H53B 109.5 . . ?
H53A C53 H53B 109.5 . . ?
C52 C53 H53C 109.5 . . ?
H53A C53 H53C 109.5 . . ?
H53B C53 H53C 109.5 . . ?
C62 C61 H61A 109.5 . . ?
C62 C61 H61B 109.5 . . ?
H61A C61 H61B 109.5 . . ?
C62 C61 H61C 109.5 . . ?
H61A C61 H61C 109.5 . . ?
H61B C61 H61C 109.5 . . ?
O64 C62 C61 125(5) . . ?
O64 C62 C63 118(4) . . ?
C61 C62 C63 117(4) . . ?
C62 C63 H63A 109.5 . . ?
C62 C63 H63B 109.5 . . ?
H63A C63 H63B 109.5 . . ?
C62 C63 H63C 109.5 . . ?
H63A C63 H63C 109.5 . . ?
H63B C63 H63C 109.5 . . ?

loop_
_geom_torsion_atom_site_label_1
_geom_torsion_atom_site_label_2
_geom_torsion_atom_site_label_3
_geom_torsion_atom_site_label_4
_geom_torsion
_geom_torsion_site_symmetry_1
_geom_torsion_site_symmetry_2
_geom_torsion_site_symmetry_3
_geom_torsion_site_symmetry_4
_geom_torsion_publ_flag
C1 Pt N11 C12 161(7) . . . . ?
C2 Pt N11 C12 -7(2) . . . . ?
N22 Pt N11 C12 175(2) . . . . ?
C34 Pt N11 C12 84(2) . . . . ?
Br Pt N11 C12 -98.5(19) . . . . ?
C1 Pt N11 C16 -18(8) . . . . ?
C2 Pt N11 C16 174.2(17) . . . . ?
N22 Pt N11 C16 -4.5(16) . . . . ?
C34 Pt N11 C16 -95.3(17) . . . . ?
Br Pt N11 C16 82.4(16) . . . . ?
C16 N11 C12 C13 4(3) . . . . ?
Pt N11 C12 C13 -175.1(17) . . . . ?
N11 C12 C13 C14 -1(4) . . . . ?
N11 C12 C13 C23 170(2) . . . . ?
C12 C13 C14 C15 0(4) . . . . ?
C23 C13 C14 C15 -172(2) . . . . ?
C13 C14 C15 C16 0(4) . . . . ?
C12 N11 C16 C15 -5(3) . . . . ?
Pt N11 C16 C15 174.5(18) . . . . ?
C12 N11 C16 C17 -178(2) . . . . ?
Pt N11 C16 C17 1(3) . . . . ?
C14 C15 C16 N11 3(4) . . . . ?
C14 C15 C16 C17 176(2) . . . . ?
N11 C16 C17 N22 6(3) . . . . ?
C15 C16 C17 N22 -168(2) . . . . ?
N11 C16 C17 C18 -178(2) . . . . ?
C15 C16 C17 C18 8(4) . . . . ?
N22 C17 C18 C19 -2(4) . . . . ?
C16 C17 C18 C19 -178(2) . . . . ?
C17 C18 C19 C20 0(4) . . . . ?
C18 C19 C20 N28 178(2) . . . . ?
C18 C19 C20 C21 0(3) . . . . ?
N28 C20 C21 N22 -176(2) . . . . ?
C19 C20 C21 N22 2(4) . . . . ?
C20 C21 N22 C17 -4(3) . . . . ?
C20 C21 N22 Pt -173.5(18) . . . . ?
C18 C17 N22 C21 4(3) . . . . ?
C16 C17 N22 C21 -180(2) . . . . ?
C18 C17 N22 Pt 173.9(17) . . . . ?
C16 C17 N22 Pt -10(2) . . . . ?
C1 Pt N22 C21 -3.6(18) . . . . ?
C2 Pt N22 C21 158(12) . . . . ?
C34 Pt N22 C21 -87.9(17) . . . . ?
N11 Pt N22 C21 177.9(18) . . . . ?
Br Pt N22 C21 86.7(16) . . . . ?
C1 Pt N22 C17 -173.7(16) . . . . ?
C2 Pt N22 C17 -12(14) . . . . ?
C34 Pt N22 C17 102.0(16) . . . . ?
N11 Pt N22 C17 7.9(15) . . . . ?
Br Pt N22 C17 -83.4(15) . . . . ?
C14 C13 C23 O24 171(3) . . . . ?
C12 C13 C23 O24 0(4) . . . . ?
C14 C13 C23 O25 -10(3) . . . . ?
C12 C13 C23 O25 179(2) . . . . ?
O24 C23 O25 C26 -5(3) . . . . ?
C13 C23 O25 C26 176(2) . . . . ?
C23 O25 C26 C27 178(2) . . . . ?
C21 C20 N28 C29 -166(2) . . . . ?
C19 C20 N28 C29 16(4) . . . . ?
C20 N28 C29 O30 1(4) . . . . ?
C20 N28 C29 O31 175(2) . . . . ?
O30 C29 O31 C32 -4(4) . . . . ?
N28 C29 O31 C32 -178.2(19) . . . . ?
C29 O31 C32 C33 174(2) . . . . ?
C1 Pt C34 C35 163.6(17) . . . . ?
C2 Pt C34 C35 77.8(17) . . . . ?
N22 Pt C34 C35 -98.7(16) . . . . ?
N11 Pt C34 C35 -22.6(17) . . . . ?
Br Pt C34 C35 -177(6) . . . . ?
Pt C34 C35 C37 92(2) . . . . ?
Pt C34 C35 C41 -92(2) . . . . ?
C41 C35 C37 C38 10(3) . . . . ?
C34 C35 C37 C38 -174(2) . . . . ?
C35 C37 C38 C39 -7(3) . . . . ?
C37 C38 C39 C40 2(4) . . . . ?
C37 C38 C39 C42 179(2) . . . . ?
C38 C39 C40 C41 2(4) . . . . ?
C42 C39 C40 C41 -176(2) . . . . ?
C39 C40 C41 C35 0(4) . . . . ?
C37 C35 C41 C40 -6(3) . . . . ?
C34 C35 C41 C40 178(2) . . . . ?
C40 C39 C42 O43 -17(4) . . . . ?
C38 C39 C42 O43 166(2) . . . . ?
C40 C39 C42 O44 163(2) . . . . ?
C38 C39 C42 O44 -14(4) . . . . ?

loop_
_geom_hbond_atom_site_label_D
_geom_hbond_atom_site_label_H
_geom_hbond_atom_site_label_A
_geom_hbond_distance_DH
_geom_hbond_distance_HA
_geom_hbond_distance_DA
_geom_hbond_angle_DHA
_geom_hbond_site_symmetry_A
N28 H28A O54 0.88 2.00 2.86(3) 167.1 .
O44 H44A O43 0.84 1.88 2.55(2) 135.5 2_456

_diffrn_measured_fraction_theta_max 0.937
_diffrn_reflns_theta_full        20.81
_diffrn_measured_fraction_theta_full 0.937
_refine_diff_density_max         1.971
_refine_diff_density_min         -1.712
_refine_diff_density_rms         0.247

#===END

  
data_5
_publ_contact_author_name        Puddephatt
_publ_contact_author_address     
;Department of Chemistry
University of Western Ontario
London, Canada N6A 5B7
;
_publ_contact_author_email       pudd@uwo.ca
_publ_contact_author_phone       519-611-2111
_publ_contact_author_fax         519-611-3022
loop_
_publ_author_name
_publ_author_address
'Puddephatt, R.J.'
;Department of Chemistry
University of Western Ontario
London, Canada N6A 5B7
;

_audit_creation_method           SHELXL-97
_chemical_name_systematic        
; 
 ? 
;
_chemical_name_common            ?
_chemical_melting_point          ?
_chemical_formula_moiety         'C31 H40 Br N3 O7 Pt'
_chemical_formula_sum            'C31 H40 Br N3 O7 Pt'
_chemical_formula_weight         841.66

loop_
_atom_type_symbol
_atom_type_description
_atom_type_scat_dispersion_real
_atom_type_scat_dispersion_imag
_atom_type_scat_source
C C 0.0033 0.0016 'International Tables Vol C Tables 4.2.6.8 and 6.1.1.4'
H H 0.0000 0.0000 'International Tables Vol C Tables 4.2.6.8 and 6.1.1.4'
N N 0.0061 0.0033 'International Tables Vol C Tables 4.2.6.8 and 6.1.1.4'
O O 0.0106 0.0060 'International Tables Vol C Tables 4.2.6.8 and 6.1.1.4'
Br Br -0.2901 2.4595 'International Tables Vol C Tables 4.2.6.8 and 6.1.1.4'
Pt Pt -1.7033 8.3905 'International Tables Vol C Tables 4.2.6.8 and 6.1.1.4'

_symmetry_cell_setting           Triclinic
_symmetry_space_group_name_H-M   'P -1'
_symmetry_space_group_name_Hall  '-P 1'

loop_
_symmetry_equiv_pos_as_xyz
'x, y, z'
'-x, -y, -z'

_cell_length_a                   10.6240(6)
_cell_length_b                   11.4761(5)
_cell_length_c                   14.7585(8)
_cell_angle_alpha                90.689(3)
_cell_angle_beta                 104.923(2)
_cell_angle_gamma                113.539(3)
_cell_volume                     1580.56(14)
_cell_formula_units_Z            2
_cell_measurement_temperature    150(2)
_cell_measurement_reflns_used    17945
_cell_measurement_theta_min      2.04
_cell_measurement_theta_max      30.03

_exptl_crystal_description       shoebox
_exptl_crystal_colour            yellow
_exptl_crystal_size_max          0.40
_exptl_crystal_size_mid          0.10
_exptl_crystal_size_min          0.05
_exptl_crystal_density_meas      ?
_exptl_crystal_density_diffrn    1.769
_exptl_crystal_density_method    'not measured'
_exptl_crystal_F_000             832
_exptl_absorpt_coefficient_mu    5.753
_exptl_absorpt_correction_type   multi-scan
_exptl_absorpt_correction_T_min  0.2068
_exptl_absorpt_correction_T_max  0.7618
_exptl_absorpt_process_details   'DENZO-SMN (Otwinowski & Minor, 1997)'

_exptl_special_details           
; 
 ? 
;

_diffrn_ambient_temperature      150(2)
_diffrn_radiation_wavelength     0.71073
_diffrn_radiation_type           MoK\a
_diffrn_radiation_source         'fine-focus sealed tube'
_diffrn_radiation_monochromator  graphite
_diffrn_measurement_device_type  'Nonius Kappa-CCD'
_diffrn_measurement_method       '\f scans, and \w scans with \k offsets'
_diffrn_detector_area_resol_mean ?
_diffrn_standards_number         0
_diffrn_standards_interval_count ?
_diffrn_standards_interval_time  ?
_diffrn_standards_decay_%        ?
_diffrn_reflns_number            18692
_diffrn_reflns_av_R_equivalents  0.052
_diffrn_reflns_av_sigmaI/netI    0.0465
_diffrn_reflns_limit_h_min       -11
_diffrn_reflns_limit_h_max       12
_diffrn_reflns_limit_k_min       -13
_diffrn_reflns_limit_k_max       13
_diffrn_reflns_limit_l_min       -17
_diffrn_reflns_limit_l_max       17
_diffrn_reflns_theta_min         2.57
_diffrn_reflns_theta_max         25.02
_reflns_number_total             5562
_reflns_number_gt                4898
_reflns_threshold_expression     I>2\s(I)

_computing_data_collection       'COLLECT (Nonius, 1997-2001)'
_computing_cell_refinement       'DENZO-SMN (Otwinowski & Minor, 1997)'
_computing_data_reduction        DENZO-SMN
_computing_structure_solution    'SHELXS-97 (Sheldrick, 1997)'
_computing_structure_refinement  'SHELXL-97 (Sheldrick, 1997)'
_computing_molecular_graphics    'SHELXTL/PC (Sheldrick, 2001)'
_computing_publication_material  SHELXTL/PC

_refine_special_details          
; 
 Refinement of F^2^ against ALL reflections.  The weighted R-factor wR and 
 goodness of fit S are based on F^2^, conventional R-factors R are based 
 on F, with F set to zero for negative F^2^. The threshold expression of 
 F^2^ > 2sigma(F^2^) is used only for calculating R-factors(gt) etc. and is 
 not relevant to the choice of reflections for refinement.  R-factors based 
 on F^2^ are statistically about twice as large as those based on F, and R- 
 factors based on ALL data will be even larger. 
;

_refine_ls_structure_factor_coef Fsqd
_refine_ls_matrix_type           full
_refine_ls_weighting_scheme      calc
_refine_ls_weighting_details     
'calc w=1/[\s^2^(Fo^2^)+(0.0465P)^2^+5.2683P] where P=(Fo^2^+2Fc^2^)/3'
_atom_sites_solution_primary     direct
_atom_sites_solution_secondary   difmap
_atom_sites_solution_hydrogens   geom
_refine_ls_hydrogen_treatment    constr
_refine_ls_extinction_method     none
_refine_ls_extinction_coef       ?
_refine_ls_number_reflns         5562
_refine_ls_number_parameters     365
_refine_ls_number_restraints     3
_refine_ls_R_factor_all          0.0448
_refine_ls_R_factor_gt           0.0371
_refine_ls_wR_factor_ref         0.0954
_refine_ls_wR_factor_gt          0.0909
_refine_ls_goodness_of_fit_ref   1.022
_refine_ls_restrained_S_all      1.022
_refine_ls_shift/su_max          0.005
_refine_ls_shift/su_mean         0.000

loop_
_atom_site_label
_atom_site_type_symbol
_atom_site_fract_x
_atom_site_fract_y
_atom_site_fract_z
_atom_site_U_iso_or_equiv
_atom_site_adp_type
_atom_site_occupancy
_atom_site_symmetry_multiplicity
_atom_site_calc_flag
_atom_site_refinement_flags
_atom_site_disorder_assembly
_atom_site_disorder_group
Pt Pt 0.48780(2) 0.49163(2) 0.275471(15) 0.03026(10) Uani 1 1 d . . .
Br Br 0.32139(7) 0.58320(6) 0.17080(4) 0.03899(17) Uani 1 1 d . . .
C1 C 0.5476(7) 0.6309(6) 0.3864(4) 0.0373(15) Uani 1 1 d . . .
H1A H 0.5008 0.6885 0.3670 0.056 Uiso 1 1 calc R . .
H1B H 0.6518 0.6799 0.4048 0.056 Uiso 1 1 calc R . .
H1C H 0.5187 0.5905 0.4402 0.056 Uiso 1 1 calc R . .
C2 C 0.3235(7) 0.3803(6) 0.3298(4) 0.0367(15) Uani 1 1 d . . .
H2A H 0.3324 0.3003 0.3443 0.055 Uiso 1 1 calc R . .
H2B H 0.2311 0.3606 0.2831 0.055 Uiso 1 1 calc R . .
H2C H 0.3292 0.4273 0.3877 0.055 Uiso 1 1 calc R . .
N11 N 0.4438(5) 0.3552(5) 0.1561(3) 0.0296(11) Uani 1 1 d . . .
C12 C 0.3390(6) 0.2369(5) 0.1325(4) 0.0317(14) Uani 1 1 d . . .
H12A H 0.2737 0.2083 0.1694 0.038 Uiso 1 1 calc R . .
C13 C 0.3216(6) 0.1546(5) 0.0568(4) 0.0307(13) Uani 1 1 d . . .
C14 C 0.4162(7) 0.1968(6) 0.0026(4) 0.0350(14) Uani 1 1 d . . .
H14A H 0.4079 0.1420 -0.0495 0.042 Uiso 1 1 calc R . .
C15 C 0.5225(7) 0.3194(6) 0.0257(4) 0.0326(14) Uani 1 1 d . . .
H15A H 0.5868 0.3501 -0.0117 0.039 Uiso 1 1 calc R . .
C16 C 0.5369(6) 0.3982(5) 0.1024(4) 0.0295(13) Uani 1 1 d . . .
C17 C 0.6478(6) 0.5317(5) 0.1303(4) 0.0293(13) Uani 1 1 d . . .
C18 C 0.7474(7) 0.5874(6) 0.0802(4) 0.0362(14) Uani 1 1 d . . .
H18A H 0.7448 0.5407 0.0256 0.043 Uiso 1 1 calc R . .
C19 C 0.8499(7) 0.7113(6) 0.1110(4) 0.0361(15) Uani 1 1 d . . .
H19A H 0.9191 0.7506 0.0782 0.043 Uiso 1 1 calc R . .
C20 C 0.8505(6) 0.7774(6) 0.1900(4) 0.0337(14) Uani 1 1 d . . .
C21 C 0.7493(6) 0.7158(6) 0.2371(4) 0.0324(14) Uani 1 1 d . . .
H21A H 0.7510 0.7605 0.2923 0.039 Uiso 1 1 calc R . .
N22 N 0.6498(5) 0.5961(5) 0.2076(3) 0.0295(11) Uani 1 1 d . . .
N23 N 0.2063(6) 0.0340(5) 0.0397(4) 0.0364(12) Uani 1 1 d . . .
H23A H 0.1526 0.0170 0.0786 0.044 Uiso 1 1 calc R . .
C24 C 0.1705(7) -0.0594(6) -0.0322(5) 0.0371(15) Uani 1 1 d . . .
O25 O 0.2305(5) -0.0531(4) -0.0926(3) 0.0501(13) Uani 1 1 d . . .
O26 O 0.0531(5) -0.1617(4) -0.0277(3) 0.0410(11) Uani 1 1 d . . .
C27 C 0.0099(7) -0.2756(6) -0.0934(5) 0.0400(16) Uani 1 1 d . . .
H27A H 0.0203 -0.2501 -0.1559 0.048 Uiso 1 1 calc R . .
H27B H -0.0922 -0.3319 -0.1016 0.048 Uiso 1 1 calc R . .
C28 C 0.0968(10) -0.3461(8) -0.0591(7) 0.069(2) Uani 1 1 d . . .
H28A H 0.1924 -0.3003 -0.0673 0.103 Uiso 1 1 calc R . .
H28B H 0.0512 -0.4320 -0.0951 0.103 Uiso 1 1 calc R . .
H28C H 0.1053 -0.3535 0.0081 0.103 Uiso 1 1 calc R . .
C29 C 0.9578(7) 0.9122(6) 0.2233(5) 0.0367(15) Uani 1 1 d . A .
O30 O 1.0375(5) 0.9743(4) 0.1790(3) 0.0466(12) Uani 1 1 d . . .
O31 O 0.9529(5) 0.9554(4) 0.3050(4) 0.0488(13) Uani 1 1 d . . .
C32A C 1.041(2) 1.0920(16) 0.3391(11) 0.061(5) Uiso 0.60 1 d PD A 1
H32A H 0.9866 1.1442 0.3161 0.073 Uiso 0.60 1 calc PR A 1
H32B H 1.1296 1.1238 0.3194 0.073 Uiso 0.60 1 calc PR A 1
C33A C 1.072(2) 1.0930(18) 0.4433(12) 0.094(6) Uiso 0.60 1 d PD A 1
H33A H 0.9982 1.1071 0.4645 0.142 Uiso 0.60 1 calc PR A 1
H33B H 1.1659 1.1620 0.4743 0.142 Uiso 0.60 1 calc PR A 1
H33C H 1.0718 1.0105 0.4598 0.142 Uiso 0.60 1 calc PR A 1
C32B C 1.0739(17) 1.0773(15) 0.3560(11) 0.021(4) Uiso 0.40 1 d PD A 2
H32C H 1.1012 1.1350 0.3083 0.026 Uiso 0.40 1 calc PR A 2
H32D H 1.0380 1.1182 0.3966 0.026 Uiso 0.40 1 calc PR A 2
C33B C 1.205(3) 1.071(3) 0.416(2) 0.110(10) Uiso 0.40 1 d PD A 2
H33D H 1.1791 1.0036 0.4565 0.165 Uiso 0.40 1 calc PR A 2
H33E H 1.2672 1.1534 0.4545 0.165 Uiso 0.40 1 calc PR A 2
H33F H 1.2556 1.0505 0.3751 0.165 Uiso 0.40 1 calc PR A 2
C41 C 0.6160(7) 0.4104(6) 0.3642(4) 0.0373(15) Uani 1 1 d . . .
H41A H 0.6037 0.4132 0.4284 0.045 Uiso 1 1 calc R . .
H41B H 0.5815 0.3192 0.3390 0.045 Uiso 1 1 calc R . .
C42 C 0.7650(8) 0.4751(7) 0.3711(5) 0.0450(17) Uani 1 1 d . . .
C43 C 0.8577(8) 0.5782(8) 0.4416(5) 0.0525(19) Uani 1 1 d . . .
H43A H 0.8207 0.6044 0.4863 0.063 Uiso 1 1 calc R . .
C44 C 1.0016(9) 0.6428(8) 0.4479(6) 0.058(2) Uani 1 1 d . . .
H44A H 1.0609 0.7119 0.4971 0.070 Uiso 1 1 calc R . .
C45 C 1.0614(9) 0.6098(9) 0.3847(6) 0.059(2) Uani 1 1 d . C .
C46 C 0.9731(10) 0.5097(9) 0.3154(6) 0.063(2) Uani 1 1 d . . .
H46A H 1.0112 0.4861 0.2703 0.076 Uiso 1 1 calc R . .
C47 C 0.8280(9) 0.4410(8) 0.3088(5) 0.054(2) Uani 1 1 d . . .
H47A H 0.7710 0.3697 0.2611 0.065 Uiso 1 1 calc R . .
C48 C 1.2170(10) 0.6815(10) 0.3901(8) 0.079(3) Uani 1 1 d . . .
H48A H 1.2382 0.6388 0.3409 0.094 Uiso 0.60 1 calc PR B 1
H48B H 1.2757 0.6753 0.4524 0.094 Uiso 0.60 1 calc PR B 1
H48C H 1.2587 0.6213 0.3788 0.094 Uiso 0.40 1 d PR B 2
H48D H 1.2719 0.7324 0.4530 0.094 Uiso 0.40 1 d PR B 2
C49A C 1.2623(14) 0.8209(13) 0.3772(10) 0.053(3) Uiso 0.60 1 d PD C 1
O50A O 1.1859(14) 0.8774(12) 0.3602(9) 0.092(4) Uiso 0.60 1 d PD C 1
O51A O 1.4023(12) 0.8785(11) 0.3826(9) 0.068(3) Uiso 0.60 1 d PD C 1
H51A H 1.4513 0.8764 0.4367 0.082 Uiso 0.60 1 calc PR C 1
C49B C 1.232(4) 0.773(4) 0.316(3) 0.142(14) Uiso 0.40 1 d PD C 2
O50B O 1.141(4) 0.774(3) 0.249(2) 0.176(12) Uiso 0.40 1 d PD C 2
O51B O 1.372(3) 0.850(3) 0.328(2) 0.125(8) Uiso 0.40 1 d PD C 2
H51B H 1.3807 0.8930 0.2828 0.150 Uiso 0.40 1 calc PR C 2
O61 O 1.476(2) 1.0296(16) 0.3559(13) 0.222(7) Uiso 1 1 d . D 3
C62 C 1.6237(19) 1.0556(16) 0.3719(12) 0.137(5) Uiso 1 1 d . D 3
H62A H 1.6595 1.0191 0.4280 0.164 Uiso 1 1 calc R D 3
H62B H 1.6844 1.1486 0.3789 0.164 Uiso 1 1 calc R D 3
C63 C 1.6145(18) 0.9817(15) 0.2745(11) 0.136(5) Uiso 1 1 d . D 3
H63A H 1.7022 1.0279 0.2548 0.163 Uiso 1 1 calc R D 3
H63B H 1.6052 0.8936 0.2833 0.163 Uiso 1 1 calc R D 3
C64 C 1.494(2) 0.9784(19) 0.2061(14) 0.165(7) Uiso 1 1 d . D 3
H64A H 1.4350 0.8910 0.1716 0.198 Uiso 1 1 calc R D 3
H64B H 1.5230 1.0384 0.1600 0.198 Uiso 1 1 calc R D 3
C65 C 1.4177(14) 1.0162(12) 0.2573(9) 0.093(3) Uiso 1 1 d . D 3
H65A H 1.4175 1.0990 0.2391 0.112 Uiso 1 1 calc R D 3
H65B H 1.3170 0.9517 0.2395 0.112 Uiso 1 1 calc R D 3

loop_
_atom_site_aniso_label
_atom_site_aniso_U_11
_atom_site_aniso_U_22
_atom_site_aniso_U_33
_atom_site_aniso_U_23
_atom_site_aniso_U_13
_atom_site_aniso_U_12
Pt 0.02481(14) 0.03337(15) 0.02224(13) 0.00379(9) 0.01023(9) -0.00038(10)
Br 0.0312(3) 0.0487(4) 0.0308(3) 0.0059(3) 0.0113(3) 0.0088(3)
C1 0.033(4) 0.040(4) 0.031(3) 0.001(3) 0.012(3) 0.005(3)
C2 0.031(3) 0.036(3) 0.028(3) 0.005(3) 0.016(3) -0.006(3)
N11 0.022(3) 0.034(3) 0.027(2) 0.003(2) 0.012(2) 0.004(2)
C12 0.026(3) 0.032(3) 0.026(3) 0.007(2) 0.012(2) -0.002(3)
C13 0.026(3) 0.031(3) 0.028(3) 0.005(2) 0.008(2) 0.004(3)
C14 0.028(3) 0.038(3) 0.034(3) 0.004(3) 0.014(3) 0.006(3)
C15 0.031(3) 0.033(3) 0.028(3) 0.005(2) 0.015(3) 0.004(3)
C16 0.024(3) 0.032(3) 0.026(3) 0.010(2) 0.011(2) 0.003(2)
C17 0.020(3) 0.032(3) 0.028(3) 0.006(2) 0.008(2) 0.002(2)
C18 0.032(3) 0.040(3) 0.032(3) 0.008(3) 0.016(3) 0.006(3)
C19 0.029(3) 0.041(4) 0.035(3) 0.013(3) 0.017(3) 0.006(3)
C20 0.023(3) 0.037(3) 0.036(3) 0.008(3) 0.012(3) 0.006(3)
C21 0.024(3) 0.033(3) 0.029(3) 0.004(2) 0.009(2) 0.001(3)
N22 0.020(2) 0.034(3) 0.026(2) 0.007(2) 0.007(2) 0.001(2)
N23 0.031(3) 0.028(3) 0.037(3) -0.003(2) 0.015(2) -0.003(2)
C24 0.029(3) 0.032(3) 0.040(4) 0.003(3) 0.014(3) 0.001(3)
O25 0.043(3) 0.042(3) 0.050(3) -0.007(2) 0.026(2) -0.005(2)
O26 0.038(3) 0.029(2) 0.046(3) 0.0003(19) 0.020(2) -0.0001(19)
C27 0.034(4) 0.032(3) 0.041(4) -0.003(3) 0.007(3) 0.003(3)
C28 0.064(6) 0.054(5) 0.081(6) 0.007(4) 0.011(5) 0.023(4)
C29 0.026(3) 0.031(3) 0.048(4) 0.014(3) 0.015(3) 0.005(3)
O30 0.039(3) 0.040(3) 0.048(3) 0.013(2) 0.021(2) -0.002(2)
O31 0.046(3) 0.032(2) 0.056(3) -0.003(2) 0.028(2) -0.005(2)
C41 0.044(4) 0.039(3) 0.025(3) 0.010(3) 0.017(3) 0.008(3)
C42 0.054(5) 0.056(4) 0.032(3) 0.013(3) 0.013(3) 0.030(4)
C43 0.046(5) 0.070(5) 0.040(4) 0.002(4) 0.013(3) 0.023(4)
C44 0.044(5) 0.071(5) 0.057(5) 0.008(4) 0.012(4) 0.023(4)
C45 0.048(5) 0.080(6) 0.063(5) 0.029(5) 0.027(4) 0.034(4)
C46 0.069(6) 0.095(7) 0.053(5) 0.023(5) 0.030(4) 0.053(6)
C47 0.056(5) 0.075(5) 0.037(4) 0.008(4) 0.016(4) 0.031(4)
C48 0.053(6) 0.102(7) 0.098(7) 0.043(6) 0.034(5) 0.041(5)

_geom_special_details            
; 
 All esds (except the esd in the dihedral angle between two l.s. planes) 
 are estimated using the full covariance matrix.  The cell esds are taken 
 into account individually in the estimation of esds in distances, angles 
 and torsion angles; correlations between esds in cell parameters are only 
 used when they are defined by crystal symmetry.  An approximate (isotropic) 
 treatment of cell esds is used for estimating esds involving l.s. planes. 
;

loop_
_geom_bond_atom_site_label_1
_geom_bond_atom_site_label_2
_geom_bond_distance
_geom_bond_site_symmetry_2
_geom_bond_publ_flag
Pt C1 2.056(6) . ?
Pt C2 2.071(6) . ?
Pt C41 2.137(7) . ?
Pt N22 2.162(5) . ?
Pt N11 2.168(5) . ?
Pt Br 2.5947(7) . ?
C1 H1A 0.9800 . ?
C1 H1B 0.9800 . ?
C1 H1C 0.9800 . ?
C2 H2A 0.9800 . ?
C2 H2B 0.9800 . ?
C2 H2C 0.9800 . ?
N11 C12 1.336(7) . ?
N11 C16 1.369(7) . ?
C12 C13 1.380(9) . ?
C12 H12A 0.9500 . ?
C13 C14 1.386(9) . ?
C13 N23 1.400(7) . ?
C14 C15 1.376(8) . ?
C14 H14A 0.9500 . ?
C15 C16 1.378(8) . ?
C15 H15A 0.9500 . ?
C16 C17 1.482(8) . ?
C17 N22 1.342(8) . ?
C17 C18 1.397(8) . ?
C18 C19 1.381(9) . ?
C18 H18A 0.9500 . ?
C19 C20 1.380(9) . ?
C19 H19A 0.9500 . ?
C20 C21 1.389(8) . ?
C20 C29 1.490(9) . ?
C21 N22 1.335(7) . ?
C21 H21A 0.9500 . ?
N23 C24 1.363(8) . ?
N23 H23A 0.8800 . ?
C24 O25 1.210(8) . ?
C24 O26 1.347(7) . ?
O26 C27 1.456(8) . ?
C27 C28 1.459(11) . ?
C27 H27A 0.9900 . ?
C27 H27B 0.9900 . ?
C28 H28A 0.9800 . ?
C28 H28B 0.9800 . ?
C28 H28C 0.9800 . ?
C29 O30 1.211(8) . ?
C29 O31 1.319(8) . ?
O31 C32A 1.467(17) . ?
O31 C32B 1.489(15) . ?
C32A C33A 1.49(2) . ?
C32A H32A 0.9900 . ?
C32A H32B 0.9900 . ?
C33A H33A 0.9800 . ?
C33A H33B 0.9800 . ?
C33A H33C 0.9800 . ?
C32B C33B 1.47(2) . ?
C32B H32C 0.9900 . ?
C32B H32D 0.9900 . ?
C33B H33D 0.9800 . ?
C33B H33E 0.9800 . ?
C33B H33F 0.9800 . ?
C41 C42 1.430(10) . ?
C41 H41A 0.9900 . ?
C41 H41B 0.9900 . ?
C42 C47 1.401(10) . ?
C42 C43 1.402(10) . ?
C43 C44 1.384(11) . ?
C43 H43A 0.9500 . ?
C44 C45 1.381(12) . ?
C44 H44A 0.9500 . ?
C45 C46 1.365(12) . ?
C45 C48 1.504(12) . ?
C46 C47 1.400(12) . ?
C46 H46A 0.9500 . ?
C47 H47A 0.9500 . ?
C48 C49A 1.506(16) . ?
C48 C49B 1.52(4) . ?
C48 H48A 0.9900 . ?
C48 H48B 0.9900 . ?
C48 H48C 0.9900 . ?
C48 H48D 0.9901 . ?
C49A O50A 1.209(16) . ?
C49A O51A 1.345(15) . ?
C49A H48D 1.5313 . ?
O51A H51A 0.8400 . ?
C49B O50B 1.20(2) . ?
C49B O51B 1.36(2) . ?
O51B H51B 0.8400 . ?
O61 C65 1.407(18) . ?
O61 C62 1.43(2) . ?
C62 C63 1.621(19) . ?
C62 H62A 0.9900 . ?
C62 H62B 0.9900 . ?
C63 C64 1.40(2) . ?
C63 H63A 0.9900 . ?
C63 H63B 0.9900 . ?
C64 C65 1.417(19) . ?
C64 H64A 0.9900 . ?
C64 H64B 0.9900 . ?
C65 H65A 0.9900 . ?
C65 H65B 0.9900 . ?

loop_
_geom_angle_atom_site_label_1
_geom_angle_atom_site_label_2
_geom_angle_atom_site_label_3
_geom_angle
_geom_angle_site_symmetry_1
_geom_angle_site_symmetry_3
_geom_angle_publ_flag
C1 Pt C2 87.1(3) . . ?
C1 Pt C41 88.8(3) . . ?
C2 Pt C41 86.8(3) . . ?
C1 Pt N22 97.7(2) . . ?
C2 Pt N22 175.0(2) . . ?
C41 Pt N22 94.4(2) . . ?
C1 Pt N11 174.6(2) . . ?
C2 Pt N11 98.1(2) . . ?
C41 Pt N11 90.3(2) . . ?
N22 Pt N11 77.04(18) . . ?
C1 Pt Br 91.12(19) . . ?
C2 Pt Br 90.3(2) . . ?
C41 Pt Br 177.12(17) . . ?
N22 Pt Br 88.44(13) . . ?
N11 Pt Br 90.02(13) . . ?
Pt C1 H1A 109.5 . . ?
Pt C1 H1B 109.5 . . ?
H1A C1 H1B 109.5 . . ?
Pt C1 H1C 109.5 . . ?
H1A C1 H1C 109.5 . . ?
H1B C1 H1C 109.5 . . ?
Pt C2 H2A 109.5 . . ?
Pt C2 H2B 109.5 . . ?
H2A C2 H2B 109.5 . . ?
Pt C2 H2C 109.5 . . ?
H2A C2 H2C 109.5 . . ?
H2B C2 H2C 109.5 . . ?
C12 N11 C16 119.2(5) . . ?
C12 N11 Pt 126.6(4) . . ?
C16 N11 Pt 114.3(4) . . ?
N11 C12 C13 122.7(5) . . ?
N11 C12 H12A 118.7 . . ?
C13 C12 H12A 118.7 . . ?
C12 C13 C14 118.6(5) . . ?
C12 C13 N23 116.6(5) . . ?
C14 C13 N23 124.8(6) . . ?
C15 C14 C13 118.7(6) . . ?
C15 C14 H14A 120.7 . . ?
C13 C14 H14A 120.7 . . ?
C14 C15 C16 120.9(6) . . ?
C14 C15 H15A 119.6 . . ?
C16 C15 H15A 119.6 . . ?
N11 C16 C15 119.9(5) . . ?
N11 C16 C17 116.5(5) . . ?
C15 C16 C17 123.6(5) . . ?
N22 C17 C18 121.4(5) . . ?
N22 C17 C16 116.7(5) . . ?
C18 C17 C16 121.9(6) . . ?
C19 C18 C17 119.1(6) . . ?
C19 C18 H18A 120.5 . . ?
C17 C18 H18A 120.5 . . ?
C20 C19 C18 119.3(6) . . ?
C20 C19 H19A 120.4 . . ?
C18 C19 H19A 120.4 . . ?
C19 C20 C21 118.7(6) . . ?
C19 C20 C29 120.3(6) . . ?
C21 C20 C29 121.1(6) . . ?
N22 C21 C20 122.4(6) . . ?
N22 C21 H21A 118.8 . . ?
C20 C21 H21A 118.8 . . ?
C21 N22 C17 119.3(5) . . ?
C21 N22 Pt 125.3(4) . . ?
C17 N22 Pt 115.4(4) . . ?
C24 N23 C13 125.3(5) . . ?
C24 N23 H23A 117.4 . . ?
C13 N23 H23A 117.4 . . ?
O25 C24 O26 124.1(6) . . ?
O25 C24 N23 126.7(6) . . ?
O26 C24 N23 109.2(6) . . ?
C24 O26 C27 116.0(5) . . ?
O26 C27 C28 111.1(6) . . ?
O26 C27 H27A 109.4 . . ?
C28 C27 H27A 109.4 . . ?
O26 C27 H27B 109.4 . . ?
C28 C27 H27B 109.4 . . ?
H27A C27 H27B 108.0 . . ?
C27 C28 H28A 109.5 . . ?
C27 C28 H28B 109.5 . . ?
H28A C28 H28B 109.5 . . ?
C27 C28 H28C 109.5 . . ?
H28A C28 H28C 109.5 . . ?
H28B C28 H28C 109.5 . . ?
O30 C29 O31 124.8(6) . . ?
O30 C29 C20 123.3(6) . . ?
O31 C29 C20 111.9(5) . . ?
C29 O31 C32A 116.9(8) . . ?
C29 O31 C32B 117.1(7) . . ?
C32A O31 C32B 18.3(8) . . ?
O31 C32A C33A 101.8(13) . . ?
O31 C32A H32A 111.4 . . ?
C33A C32A H32A 111.4 . . ?
O31 C32A H32B 111.4 . . ?
C33A C32A H32B 111.4 . . ?
H32A C32A H32B 109.3 . . ?
C33B C32B O31 118.0(17) . . ?
C33B C32B H32C 107.8 . . ?
O31 C32B H32C 107.8 . . ?
C33B C32B H32D 107.8 . . ?
O31 C32B H32D 107.8 . . ?
H32C C32B H32D 107.1 . . ?
C32B C33B H33D 109.5 . . ?
C32B C33B H33E 109.5 . . ?
H33D C33B H33E 109.5 . . ?
C32B C33B H33F 109.5 . . ?
H33D C33B H33F 109.5 . . ?
H33E C33B H33F 109.5 . . ?
C42 C41 Pt 113.2(4) . . ?
C42 C41 H41A 108.9 . . ?
Pt C41 H41A 108.9 . . ?
C42 C41 H41B 108.9 . . ?
Pt C41 H41B 108.9 . . ?
H41A C41 H41B 107.8 . . ?
C47 C42 C43 115.7(7) . . ?
C47 C42 C41 123.0(7) . . ?
C43 C42 C41 121.3(7) . . ?
C44 C43 C42 121.8(8) . . ?
C44 C43 H43A 119.1 . . ?
C42 C43 H43A 119.1 . . ?
C45 C44 C43 121.8(8) . . ?
C45 C44 H44A 119.1 . . ?
C43 C44 H44A 119.1 . . ?
C46 C45 C44 117.4(8) . . ?
C46 C45 C48 120.6(9) . . ?
C44 C45 C48 122.0(9) . . ?
C45 C46 C47 121.9(8) . . ?
C45 C46 H46A 119.1 . . ?
C47 C46 H46A 119.1 . . ?
C46 C47 C42 121.4(8) . . ?
C46 C47 H47A 119.3 . . ?
C42 C47 H47A 119.3 . . ?
C45 C48 C49A 114.9(9) . . ?
C45 C48 C49B 109.5(14) . . ?
C49A C48 C49B 37.0(17) . . ?
C45 C48 H48A 108.5 . . ?
C49A C48 H48A 108.5 . . ?
C49B C48 H48A 76.7 . . ?
C45 C48 H48B 108.5 . . ?
C49A C48 H48B 108.5 . . ?
C49B C48 H48B 137.8 . . ?
H48A C48 H48B 107.5 . . ?
C45 C48 H48C 110.7 . . ?
C49A C48 H48C 130.4 . . ?
C49B C48 H48C 109.1 . . ?
H48A C48 H48C 36.0 . . ?
H48B C48 H48C 73.0 . . ?
C45 C48 H48D 110.6 . . ?
C49A C48 H48D 72.4 . . ?
C49B C48 H48D 108.2 . . ?
H48A C48 H48D 135.7 . . ?
H48B C48 H48D 39.7 . . ?
H48C C48 H48D 108.7 . . ?
O50A C49A O51A 121.7(13) . . ?
O50A C49A C48 126.7(13) . . ?
O51A C49A C48 111.5(11) . . ?
O50A C49A H48D 128.4 . . ?
O51A C49A H48D 98.2 . . ?
C48 C49A H48D 38.0 . . ?
O50B C49B O51B 121(4) . . ?
O50B C49B C48 129(3) . . ?
O51B C49B C48 110(3) . . ?
C49B O51B H51B 109.5 . . ?
C65 O61 C62 106.3(16) . . ?
O61 C62 C63 99.7(14) . . ?
O61 C62 H62A 111.8 . . ?
C63 C62 H62A 111.8 . . ?
O61 C62 H62B 111.8 . . ?
C63 C62 H62B 111.8 . . ?
H62A C62 H62B 109.5 . . ?
C64 C63 C62 107.1(14) . . ?
C64 C63 H63A 110.3 . . ?
C62 C63 H63A 110.3 . . ?
C64 C63 H63B 110.3 . . ?
C62 C63 H63B 110.3 . . ?
H63A C63 H63B 108.6 . . ?
C63 C64 C65 105.0(16) . . ?
C63 C64 H64A 110.8 . . ?
C65 C64 H64A 110.8 . . ?
C63 C64 H64B 110.8 . . ?
C65 C64 H64B 110.8 . . ?
H64A C64 H64B 108.8 . . ?
O61 C65 C64 112.9(14) . . ?
O61 C65 H65A 109.0 . . ?
C64 C65 H65A 109.0 . . ?
O61 C65 H65B 109.0 . . ?
C64 C65 H65B 109.0 . . ?
H65A C65 H65B 107.8 . . ?

loop_
_geom_torsion_atom_site_label_1
_geom_torsion_atom_site_label_2
_geom_torsion_atom_site_label_3
_geom_torsion_atom_site_label_4
_geom_torsion
_geom_torsion_site_symmetry_1
_geom_torsion_site_symmetry_2
_geom_torsion_site_symmetry_3
_geom_torsion_site_symmetry_4
_geom_torsion_publ_flag
C1 Pt N11 C12 167(2) . . . . ?
C2 Pt N11 C12 -0.4(5) . . . . ?
C41 Pt N11 C12 86.5(5) . . . . ?
N22 Pt N11 C12 -179.1(5) . . . . ?
Br Pt N11 C12 -90.7(5) . . . . ?
C1 Pt N11 C16 -12(3) . . . . ?
C2 Pt N11 C16 -179.4(4) . . . . ?
C41 Pt N11 C16 -92.5(4) . . . . ?
N22 Pt N11 C16 1.9(4) . . . . ?
Br Pt N11 C16 90.3(4) . . . . ?
C16 N11 C12 C13 1.1(9) . . . . ?
Pt N11 C12 C13 -177.8(4) . . . . ?
N11 C12 C13 C14 -0.4(9) . . . . ?
N11 C12 C13 N23 -179.4(6) . . . . ?
C12 C13 C14 C15 -0.8(9) . . . . ?
N23 C13 C14 C15 178.1(6) . . . . ?
C13 C14 C15 C16 1.4(10) . . . . ?
C12 N11 C16 C15 -0.6(9) . . . . ?
Pt N11 C16 C15 178.5(4) . . . . ?
C12 N11 C16 C17 178.0(5) . . . . ?
Pt N11 C16 C17 -2.9(7) . . . . ?
C14 C15 C16 N11 -0.6(9) . . . . ?
C14 C15 C16 C17 -179.2(6) . . . . ?
N11 C16 C17 N22 2.4(8) . . . . ?
C15 C16 C17 N22 -179.0(6) . . . . ?
N11 C16 C17 C18 -178.9(6) . . . . ?
C15 C16 C17 C18 -0.3(10) . . . . ?
N22 C17 C18 C19 0.0(9) . . . . ?
C16 C17 C18 C19 -178.7(6) . . . . ?
C17 C18 C19 C20 -0.6(10) . . . . ?
C18 C19 C20 C21 1.3(9) . . . . ?
C18 C19 C20 C29 -178.6(6) . . . . ?
C19 C20 C21 N22 -1.4(10) . . . . ?
C29 C20 C21 N22 178.4(6) . . . . ?
C20 C21 N22 C17 0.8(9) . . . . ?
C20 C21 N22 Pt -180.0(4) . . . . ?
C18 C17 N22 C21 -0.1(9) . . . . ?
C16 C17 N22 C21 178.6(5) . . . . ?
C18 C17 N22 Pt -179.3(5) . . . . ?
C16 C17 N22 Pt -0.6(7) . . . . ?
C1 Pt N22 C21 -1.2(5) . . . . ?
C2 Pt N22 C21 165(3) . . . . ?
C41 Pt N22 C21 -90.6(5) . . . . ?
N11 Pt N22 C21 -179.9(5) . . . . ?
Br Pt N22 C21 89.7(5) . . . . ?
C1 Pt N22 C17 178.0(4) . . . . ?
C2 Pt N22 C17 -16(3) . . . . ?
C41 Pt N22 C17 88.6(4) . . . . ?
N11 Pt N22 C17 -0.7(4) . . . . ?
Br Pt N22 C17 -91.0(4) . . . . ?
C12 C13 N23 C24 179.0(6) . . . . ?
C14 C13 N23 C24 0.1(10) . . . . ?
C13 N23 C24 O25 -0.7(11) . . . . ?
C13 N23 C24 O26 -179.2(6) . . . . ?
O25 C24 O26 C27 8.0(10) . . . . ?
N23 C24 O26 C27 -173.4(5) . . . . ?
C24 O26 C27 C28 79.7(8) . . . . ?
C19 C20 C29 O30 8.2(10) . . . . ?
C21 C20 C29 O30 -171.6(6) . . . . ?
C19 C20 C29 O31 -173.0(6) . . . . ?
C21 C20 C29 O31 7.1(9) . . . . ?
O30 C29 O31 C32A 6.4(12) . . . . ?
C20 C29 O31 C32A -172.3(9) . . . . ?
O30 C29 O31 C32B -14.1(12) . . . . ?
C20 C29 O31 C32B 167.2(9) . . . . ?
C29 O31 C32A C33A -151.5(11) . . . . ?
C32B O31 C32A C33A -56(3) . . . . ?
C29 O31 C32B C33B -84(2) . . . . ?
C32A O31 C32B C33B -178(4) . . . . ?
C1 Pt C41 C42 -80.7(5) . . . . ?
C2 Pt C41 C42 -167.9(5) . . . . ?
N22 Pt C41 C42 17.0(5) . . . . ?
N11 Pt C41 C42 94.0(5) . . . . ?
Br Pt C41 C42 -169(3) . . . . ?
Pt C41 C42 C47 -89.7(7) . . . . ?
Pt C41 C42 C43 90.2(7) . . . . ?
C47 C42 C43 C44 0.9(11) . . . . ?
C41 C42 C43 C44 -178.9(7) . . . . ?
C42 C43 C44 C45 0.4(13) . . . . ?
C43 C44 C45 C46 -0.3(12) . . . . ?
C43 C44 C45 C48 178.7(8) . . . . ?
C44 C45 C46 C47 -1.2(12) . . . . ?
C48 C45 C46 C47 179.8(8) . . . . ?
C45 C46 C47 C42 2.6(12) . . . . ?
C43 C42 C47 C46 -2.4(11) . . . . ?
C41 C42 C47 C46 177.5(7) . . . . ?
C46 C45 C48 C49A 117.3(11) . . . . ?
C44 C45 C48 C49A -61.7(13) . . . . ?
C46 C45 C48 C49B 78(2) . . . . ?
C44 C45 C48 C49B -101(2) . . . . ?
C45 C48 C49A O50A -3(2) . . . . ?
C49B C48 C49A O50A 87(3) . . . . ?
C45 C48 C49A O51A -179.9(11) . . . . ?
C49B C48 C49A O51A -90(2) . . . . ?
C45 C48 C49B O50B -15(6) . . . . ?
C49A C48 C49B O50B -121(6) . . . . ?
C45 C48 C49B O51B 172(3) . . . . ?
C49A C48 C49B O51B 66(3) . . . . ?
C65 O61 C62 C63 -28.9(17) . . . . ?
O61 C62 C63 C64 26.0(19) . . . . ?
C62 C63 C64 C65 -12.2(19) . . . . ?
C62 O61 C65 C64 25.0(19) . . . . ?
C63 C64 C65 O61 -7(2) . . . . ?

loop_
_geom_hbond_atom_site_label_D
_geom_hbond_atom_site_label_H
_geom_hbond_atom_site_label_A
_geom_hbond_distance_DH
_geom_hbond_distance_HA
_geom_hbond_distance_DA
_geom_hbond_angle_DHA
_geom_hbond_site_symmetry_A
N23 H23A O30 0.88 2.10 2.976(7) 175.5 1_445

_diffrn_measured_fraction_theta_max 0.995
_diffrn_reflns_theta_full        25.02
_diffrn_measured_fraction_theta_full 0.995
_refine_diff_density_max         1.244
_refine_diff_density_min         -1.159
_refine_diff_density_rms         0.134

#===END

  
data_6'
_publ_contact_author_name        Puddephatt
_publ_contact_author_address     
;Department of Chemistry
University of Western Ontario
London, Canada N6A 5B7
;
_publ_contact_author_email       pudd@uwo.ca
loop_
_publ_author_name
_publ_author_address
'Puddephatt, R.J.'
;Department of Chemistry
University of Western Ontario
London, Canada N6A 5B7
;

_audit_creation_method           SHELXL-97
_chemical_name_systematic        
; 
 ? 
;
_chemical_name_common            ?
_chemical_melting_point          ?
_chemical_formula_moiety         
'2(C33 H35 N4 O10 Pt), 2(C4 H8 O), C5, F6 P, F2 O2 P'
_chemical_formula_sum            'C79 H86 F8 N8 O24 P2 Pt2'
_chemical_formula_weight         1067.84


loop_
_atom_type_symbol
_atom_type_description
_atom_type_scat_dispersion_real
_atom_type_scat_dispersion_imag
_atom_type_scat_source
C C 0.0033 0.0016 'International Tables Vol C Tables 4.2.6.8 and 6.1.1.4'
H H 0.0000 0.0000 'International Tables Vol C Tables 4.2.6.8 and 6.1.1.4'
N N 0.0061 0.0033 'International Tables Vol C Tables 4.2.6.8 and 6.1.1.4'
O O 0.0106 0.0060 'International Tables Vol C Tables 4.2.6.8 and 6.1.1.4'
F F 0.0171 0.0103 'International Tables Vol C Tables 4.2.6.8 and 6.1.1.4'
P P 0.1023 0.0942 'International Tables Vol C Tables 4.2.6.8 and 6.1.1.4'
Pt Pt -1.7033 8.3905 'International Tables Vol C Tables 4.2.6.8 and 6.1.1.4'

_symmetry_cell_setting           Triclinic
_symmetry_space_group_name_H-M   'P -1'
_symmetry_space_group_name_Hall  '-P 1'

loop_
_symmetry_equiv_pos_as_xyz
'x, y, z'
'-x, -y, -z'

_cell_length_a                   7.9134(4)
_cell_length_b                   17.3581(9)
_cell_length_c                   18.1575(11)
_cell_angle_alpha                104.480(2)
_cell_angle_beta                 99.089(3)
_cell_angle_gamma                98.003(3)
_cell_volume                     2342.6(2)
_cell_formula_units_Z            2
_cell_measurement_temperature    150(2)
_cell_measurement_reflns_used    22028
_cell_measurement_theta_min      2.04
_cell_measurement_theta_max      27.48

_exptl_crystal_description       plate
_exptl_crystal_colour            colourless
_exptl_crystal_size_max          0.15
_exptl_crystal_size_mid          0.10
_exptl_crystal_size_min          0.05
_exptl_crystal_density_meas      ?
_exptl_crystal_density_diffrn    1.514
_exptl_crystal_density_method    'not measured'
_exptl_crystal_F_000             1066
_exptl_absorpt_coefficient_mu    3.105
_exptl_absorpt_correction_type   multi-scan
_exptl_absorpt_correction_T_min  0.6531
_exptl_absorpt_correction_T_max  0.8602
_exptl_absorpt_process_details   'DENZO-SMN (Otwinowski & Minor, 1997)'

_exptl_special_details           
; 
 ? 
;

_diffrn_ambient_temperature      150(2)
_diffrn_radiation_wavelength     0.71073
_diffrn_radiation_type           MoK\a
_diffrn_radiation_source         'fine-focus sealed tube'
_diffrn_radiation_monochromator  graphite
_diffrn_measurement_device_type  'Nonius Kappa-CCD'
_diffrn_measurement_method       '\f scans, and \w scans with \k offsets'
_diffrn_detector_area_resol_mean ?
_diffrn_standards_number         0
_diffrn_standards_interval_count ?
_diffrn_standards_interval_time  ?
_diffrn_standards_decay_%        ?
_diffrn_reflns_number            24056
_diffrn_reflns_av_R_equivalents  0.065
_diffrn_reflns_av_sigmaI/netI    0.0985
_diffrn_reflns_limit_h_min       -9
_diffrn_reflns_limit_h_max       8
_diffrn_reflns_limit_k_min       -20
_diffrn_reflns_limit_k_max       20
_diffrn_reflns_limit_l_min       -20
_diffrn_reflns_limit_l_max       21
_diffrn_reflns_theta_min         2.65
_diffrn_reflns_theta_max         25.03
_reflns_number_total             8240
_reflns_number_gt                5199
_reflns_threshold_expression     I>2\s(I)

_computing_data_collection       'COLLECT (Nonius, 1997-2001)'
_computing_cell_refinement       'DENZO-SMN (Otwinowski & Minor, 1997)'
_computing_data_reduction        DENZO-SMN
_computing_structure_solution    'SHELXS-97 (Sheldrick, 1997)'
_computing_structure_refinement  'SHELXL-97 (Sheldrick, 1997)'
_computing_molecular_graphics    'SHELXTL/PC (Sheldrick, 2001)'
_computing_publication_material  SHELXTL/PC

_refine_special_details          
; 
 Refinement of F^2^ against ALL reflections.  The weighted R-factor wR and 
 goodness of fit S are based on F^2^, conventional R-factors R are based 
 on F, with F set to zero for negative F^2^. The threshold expression of 
 F^2^ > 2sigma(F^2^) is used only for calculating R-factors(gt) etc. and is 
 not relevant to the choice of reflections for refinement.  R-factors based 
 on F^2^ are statistically about twice as large as those based on F, and R- 
 factors based on ALL data will be even larger. 
;

_refine_ls_structure_factor_coef Fsqd
_refine_ls_matrix_type           full
_refine_ls_weighting_scheme      calc
_refine_ls_weighting_details     
'calc w=1/[\s^2^(Fo^2^)+(0.1038P)^2^+0.1173P] where P=(Fo^2^+2Fc^2^)/3'
_atom_sites_solution_primary     direct
_atom_sites_solution_secondary   difmap
_atom_sites_solution_hydrogens   geom
_refine_ls_hydrogen_treatment    constr
_refine_ls_extinction_method     none
_refine_ls_extinction_coef       ?
_refine_ls_number_reflns         8240
_refine_ls_number_parameters     566
_refine_ls_number_restraints     525
_refine_ls_R_factor_all          0.1167
_refine_ls_R_factor_gt           0.0646
_refine_ls_wR_factor_ref         0.1883
_refine_ls_wR_factor_gt          0.1603
_refine_ls_goodness_of_fit_ref   1.025
_refine_ls_restrained_S_all      1.007
_refine_ls_shift/su_max          0.007
_refine_ls_shift/su_mean         0.000

loop_
_atom_site_label
_atom_site_type_symbol
_atom_site_fract_x
_atom_site_fract_y
_atom_site_fract_z
_atom_site_U_iso_or_equiv
_atom_site_adp_type
_atom_site_occupancy
_atom_site_symmetry_multiplicity
_atom_site_calc_flag
_atom_site_refinement_flags
_atom_site_disorder_assembly
_atom_site_disorder_group
Pt Pt -0.12715(5) 0.29686(2) 0.18322(2) 0.06115(19) Uani 1 1 d U . .
C1 C -0.3238(14) 0.3402(7) 0.1256(7) 0.077(3) Uani 1 1 d U . .
H1A H -0.3983 0.3606 0.1614 0.116 Uiso 1 1 calc R . .
H1B H -0.3937 0.2962 0.0817 0.116 Uiso 1 1 calc R . .
H1C H -0.2725 0.3841 0.1063 0.116 Uiso 1 1 calc R . .
C2 C -0.1405(18) 0.3857(7) 0.2791(7) 0.091(3) Uani 1 1 d U . .
H2A H -0.1513 0.4358 0.2647 0.137 Uiso 1 1 calc R . .
H2B H -0.0344 0.3950 0.3187 0.137 Uiso 1 1 calc R . .
H2C H -0.2421 0.3688 0.2999 0.137 Uiso 1 1 calc R . .
N11 N 0.0745(10) 0.2412(5) 0.2348(5) 0.0688(19) Uani 1 1 d U . .
C12 C 0.1361(13) 0.2556(8) 0.3117(7) 0.084(3) Uani 1 1 d U . .
H12A H 0.1024 0.2979 0.3475 0.101 Uiso 1 1 calc R . .
C13 C 0.2491(15) 0.2091(9) 0.3397(8) 0.097(3) Uani 1 1 d U . .
C14 C 0.2993(14) 0.1513(9) 0.2863(9) 0.094(3) Uani 1 1 d U . .
H14A H 0.3779 0.1199 0.3037 0.113 Uiso 1 1 calc R . .
C15 C 0.2395(13) 0.1368(7) 0.2075(8) 0.084(3) Uani 1 1 d U . .
H15A H 0.2753 0.0962 0.1708 0.101 Uiso 1 1 calc R . .
C16 C 0.1265(12) 0.1834(6) 0.1841(7) 0.064(2) Uani 1 1 d U . .
C17 C 0.0446(12) 0.1666(5) 0.1022(6) 0.058(2) Uani 1 1 d U . .
C18 C 0.0973(14) 0.1143(6) 0.0424(7) 0.070(2) Uani 1 1 d U . .
H18A H 0.1882 0.0862 0.0538 0.084 Uiso 1 1 calc R . .
C19 C 0.0169(14) 0.1035(6) -0.0337(7) 0.072(2) Uani 1 1 d U . .
H19A H 0.0556 0.0698 -0.0750 0.087 Uiso 1 1 calc R . .
C20 C -0.1205(13) 0.1422(6) -0.0492(6) 0.065(2) Uani 1 1 d U . .
C21 C -0.1635(13) 0.1933(5) 0.0132(6) 0.058(2) Uani 1 1 d U . .
H21A H -0.2560 0.2213 0.0035 0.069 Uiso 1 1 calc R . .
N22 N -0.0845(9) 0.2056(4) 0.0852(5) 0.0551(16) Uani 1 1 d U . .
C23 C 0.309(2) 0.2195(16) 0.4230(11) 0.144(5) Uani 1 1 d U . .
O24 O 0.3971(17) 0.1740(13) 0.4485(7) 0.229(8) Uani 1 1 d DU . .
O25 O 0.2422(18) 0.2784(9) 0.4675(7) 0.157(4) Uani 1 1 d U B .
C26 C 0.285(4) 0.2844(17) 0.5609(15) 0.204(9) Uiso 1 1 d DU . .
H26A H 0.2603 0.3344 0.5941 0.245 Uiso 0.35 1 calc PR A 1
H26B H 0.2284 0.2360 0.5733 0.245 Uiso 0.35 1 calc PR A 1
H26C H 0.4140 0.2921 0.5741 0.245 Uiso 0.65 1 d PR A 2
H26D H 0.2500 0.3338 0.5899 0.245 Uiso 0.65 1 d PR A 2
C27A C 0.469(7) 0.287(4) 0.562(4) 0.29(2) Uiso 0.35 1 d PDU B 1
H27A H 0.5367 0.3306 0.6062 0.432 Uiso 0.35 1 calc PR B 1
H27B H 0.4952 0.2966 0.5136 0.432 Uiso 0.35 1 calc PR B 1
H27C H 0.4986 0.2350 0.5660 0.432 Uiso 0.35 1 calc PR B 1
C27B C 0.259(7) 0.205(3) 0.573(3) 0.29(2) Uiso 0.65 1 d PDU B 2
H27D H 0.1746 0.1678 0.5288 0.432 Uiso 0.65 1 calc PR B 2
H27E H 0.2135 0.2081 0.6206 0.432 Uiso 0.65 1 calc PR B 2
H27F H 0.3696 0.1862 0.5778 0.432 Uiso 0.65 1 calc PR B 2
N28 N -0.2163(12) 0.1355(6) -0.1226(5) 0.079(2) Uani 1 1 d U . .
H28A H -0.2960 0.1660 -0.1241 0.095 Uiso 1 1 calc R . .
C29 C -0.201(2) 0.0866(9) -0.1939(9) 0.103(4) Uani 1 1 d U . .
O30 O -0.0929(19) 0.0450(8) -0.2001(7) 0.163(5) Uani 1 1 d U . .
O31 O -0.3175(15) 0.0970(6) -0.2496(5) 0.118(3) Uani 1 1 d U . .
C32 C -0.314(4) 0.0457(16) -0.3277(11) 0.227(10) Uani 1 1 d U . .
H32A H -0.2025 0.0622 -0.3430 0.273 Uiso 1 1 calc R . .
H32B H -0.3253 -0.0119 -0.3279 0.273 Uiso 1 1 calc R . .
C33 C -0.456(3) 0.0566(18) -0.3798(11) 0.246(13) Uani 1 1 d U . .
H33A H -0.5616 0.0507 -0.3584 0.368 Uiso 1 1 calc R . .
H33B H -0.4726 0.0158 -0.4299 0.368 Uiso 1 1 calc R . .
H33C H -0.4315 0.1108 -0.3870 0.368 Uiso 1 1 calc R . .
C41 C -0.3272(12) 0.2185(6) 0.2050(6) 0.063(2) Uani 1 1 d U . .
H41A H -0.4148 0.2501 0.2235 0.076 Uiso 1 1 calc R . .
H41B H -0.3851 0.1776 0.1556 0.076 Uiso 1 1 calc R . .
C42 C -0.2699(12) 0.1767(6) 0.2620(6) 0.056(2) Uani 1 1 d U . .
C43 C -0.2634(13) 0.2087(6) 0.3408(6) 0.067(2) Uani 1 1 d U . .
H43A H -0.2971 0.2596 0.3582 0.081 Uiso 1 1 calc R . .
C44 C -0.2098(13) 0.1690(7) 0.3945(6) 0.071(3) Uani 1 1 d U . .
H44A H -0.2097 0.1914 0.4479 0.085 Uiso 1 1 calc R . .
C45 C -0.1553(12) 0.0950(6) 0.3696(6) 0.064(2) Uani 1 1 d U . .
C46 C -0.1624(13) 0.0632(6) 0.2928(6) 0.064(2) Uani 1 1 d U . .
H46A H -0.1270 0.0128 0.2752 0.077 Uiso 1 1 calc R . .
C47 C -0.2207(11) 0.1034(6) 0.2401(6) 0.059(2) Uani 1 1 d U . .
H47A H -0.2268 0.0791 0.1865 0.071 Uiso 1 1 calc R . .
C48 C -0.0914(16) 0.0539(8) 0.4269(7) 0.081(3) Uani 1 1 d U . .
O49 O -0.0365(14) -0.0096(6) 0.4038(5) 0.098(3) Uani 1 1 d U . .
H49A H -0.0802 -0.0449 0.4232 0.146 Uiso 0.50 1 calc PR . .
O50 O -0.0958(13) 0.0838(5) 0.4978(5) 0.098(3) Uani 1 1 d U . .
H50A H -0.0684 0.0515 0.5232 0.147 Uiso 0.50 1 calc PR . .
N51 N 0.0787(12) 0.3794(5) 0.1574(6) 0.074(2) Uani 1 1 d U . .
C52 C 0.2220(15) 0.4183(6) 0.2100(8) 0.082(3) Uani 1 1 d U . .
H52A H 0.2323 0.4121 0.2610 0.098 Uiso 1 1 calc R . .
C53 C 0.3536(16) 0.4663(7) 0.1940(10) 0.101(3) Uani 1 1 d U . .
C54 C 0.3346(19) 0.4738(7) 0.1178(11) 0.107(3) Uani 1 1 d U . .
H54A H 0.4259 0.5048 0.1033 0.128 Uiso 1 1 calc R . .
C55 C 0.186(2) 0.4366(8) 0.0650(10) 0.103(3) Uani 1 1 d U . .
C56 C 0.0583(16) 0.3873(7) 0.0854(8) 0.083(3) Uani 1 1 d U . .
H56A H -0.0438 0.3591 0.0480 0.099 Uiso 1 1 calc R . .
C57 C 0.508(2) 0.5107(9) 0.2579(14) 0.129(5) Uani 1 1 d U . .
O58 O 0.5174(17) 0.4950(10) 0.3225(10) 0.179(5) Uani 1 1 d U . .
O59 O 0.6237(14) 0.5520(6) 0.2347(10) 0.197(6) Uani 1 1 d U . .
H59A H 0.7043 0.5774 0.2726 0.295 Uiso 1 1 calc R . .
C60 C 0.157(3) 0.4411(13) -0.0182(14) 0.141(5) Uani 1 1 d U . .
O61 O 0.0150(19) 0.3996(9) -0.0626(8) 0.162(5) Uani 1 1 d U . .
H61A H 0.0256 0.3910 -0.1091 0.244 Uiso 1 1 calc R . .
O62 O 0.262(2) 0.4916(9) -0.0364(10) 0.218(7) Uani 1 1 d U . .
P70 P -0.5000 0.0000 0.0000 0.0583(9) Uani 1 2 d SU . .
F71 F -0.4937(7) -0.0923(3) -0.0082(3) 0.0711(15) Uani 1 1 d U . .
F72 F -0.5636(7) 0.0086(3) 0.0806(3) 0.0684(14) Uani 1 1 d U . .
F73 F -0.3014(6) 0.0240(3) 0.0445(3) 0.0661(14) Uani 1 1 d U . .
P80 P 1.0709(9) 0.6279(4) 0.2681(5) 0.093(2) Uani 0.50 1 d PU . .
F81 F 1.232(2) 0.6190(14) 0.3231(12) 0.169(8) Uani 0.50 1 d PU . .
F82 F 1.145(3) 0.7173(13) 0.2825(19) 0.218(10) Uani 0.50 1 d PU . .
O83 O 0.941(2) 0.6185(11) 0.3067(10) 0.106(5) Uani 0.50 1 d PU . .
O84 O 1.083(3) 0.5949(13) 0.1999(11) 0.119(6) Uani 0.50 1 d PU . .
O101 O -0.4765(11) 0.2277(6) -0.1094(6) 0.116(3) Uani 1 1 d DU . .
C102 C -0.477(2) 0.3022(9) -0.1244(10) 0.122(5) Uiso 0.50 1 d PDU C 1
H10A H -0.3619 0.3249 -0.1326 0.147 Uiso 0.50 1 calc PR C 1
H10B H -0.5092 0.3414 -0.0815 0.147 Uiso 0.50 1 calc PR C 1
C103 C -0.614(5) 0.281(3) -0.1980(19) 0.159(12) Uiso 0.50 1 d PDU C 1
H10C H -0.6598 0.3298 -0.2051 0.190 Uiso 0.50 1 calc PR C 1
H10D H -0.5673 0.2572 -0.2440 0.190 Uiso 0.50 1 calc PR C 1
C104 C -0.746(5) 0.224(2) -0.185(2) 0.144(11) Uiso 0.50 1 d PDU C 1
H10E H -0.8054 0.1833 -0.2345 0.173 Uiso 0.50 1 calc PR C 1
H10F H -0.8337 0.2513 -0.1611 0.173 Uiso 0.50 1 calc PR C 1
C105 C -0.647(2) 0.1857(12) -0.1311(12) 0.154(6) Uiso 0.50 1 d PDU C 1
H10G H -0.6997 0.1885 -0.0848 0.185 Uiso 0.50 1 calc PR C 1
H10H H -0.6503 0.1281 -0.1575 0.185 Uiso 0.50 1 calc PR C 1
C106 C -0.477(2) 0.3022(9) -0.1244(10) 0.122(5) Uiso 0.50 1 d PDU C 2
H10I H -0.4865 0.2980 -0.1803 0.147 Uiso 0.50 1 calc PR C 2
H10J H -0.3731 0.3429 -0.0939 0.147 Uiso 0.50 1 calc PR C 2
C107 C -0.640(5) 0.320(3) -0.097(3) 0.186(14) Uiso 0.50 1 d PDU C 2
H10K H -0.6100 0.3611 -0.0457 0.223 Uiso 0.50 1 calc PR C 2
H10L H -0.7114 0.3413 -0.1340 0.223 Uiso 0.50 1 calc PR C 2
C108 C -0.726(6) 0.255(2) -0.091(3) 0.192(14) Uiso 0.50 1 d PDU C 2
H10M H -0.8503 0.2485 -0.1155 0.230 Uiso 0.50 1 calc PR C 2
H10N H -0.7195 0.2573 -0.0353 0.230 Uiso 0.50 1 calc PR C 2
C109 C -0.647(2) 0.1857(12) -0.1311(12) 0.154(6) Uiso 0.50 1 d PDU C 2
H10O H -0.6647 0.1386 -0.1099 0.185 Uiso 0.50 1 calc PR C 2
H10P H -0.6891 0.1685 -0.1881 0.185 Uiso 0.50 1 calc PR C 2
C201 C 0.458(8) 0.515(6) 0.476(8) 0.32(6) Uiso 0.25 1 d PDU D -1
C202 C 0.646(6) 0.521(3) 0.517(4) 0.24(2) Uiso 0.50 1 d PDU D -1
C203 C 0.703(4) 0.439(3) 0.495(3) 0.25(2) Uiso 0.50 1 d PDU D -1
C204 C 0.888(5) 0.445(3) 0.541(3) 0.28(2) Uiso 0.50 1 d PDU D -1
C205 C 1.026(5) 0.472(4) 0.497(3) 0.25(2) Uiso 0.50 1 d PDU D -1
C206 C 1.211(5) 0.476(3) 0.542(3) 0.100(15) Uiso 0.25 1 d PDU D -1

loop_
_atom_site_aniso_label
_atom_site_aniso_U_11
_atom_site_aniso_U_22
_atom_site_aniso_U_33
_atom_site_aniso_U_23
_atom_site_aniso_U_13
_atom_site_aniso_U_12
Pt 0.0707(3) 0.0494(3) 0.0691(3) 0.0190(2) 0.0249(2) 0.01316(18)
C1 0.093(6) 0.089(8) 0.078(7) 0.044(6) 0.037(5) 0.045(6)
C2 0.124(10) 0.079(7) 0.072(7) 0.010(5) 0.035(6) 0.030(6)
N11 0.060(4) 0.070(5) 0.078(5) 0.033(4) 0.009(4) 0.000(4)
C12 0.056(6) 0.109(8) 0.081(6) 0.025(6) 0.011(5) -0.003(5)
C13 0.058(6) 0.140(10) 0.096(6) 0.060(6) 0.000(6) -0.010(6)
C14 0.056(6) 0.136(10) 0.118(7) 0.082(7) 0.022(6) 0.019(6)
C15 0.066(6) 0.102(8) 0.111(7) 0.067(6) 0.033(6) 0.022(5)
C16 0.046(5) 0.071(6) 0.090(5) 0.043(5) 0.024(4) 0.007(4)
C17 0.053(5) 0.048(5) 0.084(5) 0.026(4) 0.028(4) 0.009(4)
C18 0.074(6) 0.050(5) 0.103(6) 0.032(5) 0.040(5) 0.024(5)
C19 0.087(7) 0.057(6) 0.085(6) 0.017(5) 0.054(5) 0.020(5)
C20 0.075(6) 0.054(5) 0.075(5) 0.025(4) 0.035(5) 0.006(4)
C21 0.075(6) 0.042(5) 0.064(5) 0.018(4) 0.025(4) 0.014(4)
N22 0.054(4) 0.045(4) 0.074(4) 0.023(3) 0.025(3) 0.009(3)
C23 0.094(10) 0.261(17) 0.101(8) 0.087(9) 0.029(8) 0.030(10)
O24 0.162(11) 0.48(2) 0.114(9) 0.131(12) 0.038(8) 0.183(15)
O25 0.163(10) 0.194(12) 0.088(7) 0.035(7) -0.023(7) 0.011(8)
N28 0.096(6) 0.081(6) 0.069(5) 0.021(5) 0.038(4) 0.015(5)
C29 0.144(11) 0.092(9) 0.077(6) 0.015(7) 0.037(7) 0.030(8)
O30 0.240(13) 0.162(11) 0.116(9) 0.024(7) 0.068(8) 0.121(10)
O31 0.179(9) 0.115(7) 0.061(5) 0.021(5) 0.028(5) 0.031(6)
C32 0.32(2) 0.27(2) 0.072(8) -0.006(13) 0.034(12) 0.09(2)
C33 0.19(2) 0.39(4) 0.083(11) 0.003(18) -0.005(11) -0.05(2)
C41 0.065(5) 0.070(5) 0.060(6) 0.023(5) 0.020(4) 0.014(4)
C42 0.063(5) 0.051(5) 0.052(5) 0.014(4) 0.016(4) 0.003(4)
C43 0.073(6) 0.072(6) 0.066(5) 0.021(5) 0.028(5) 0.023(5)
C44 0.078(7) 0.088(7) 0.053(6) 0.022(5) 0.020(5) 0.020(5)
C45 0.068(6) 0.073(6) 0.057(5) 0.027(5) 0.016(5) 0.009(5)
C46 0.070(6) 0.062(6) 0.058(5) 0.012(4) 0.008(5) 0.013(5)
C47 0.061(5) 0.064(5) 0.051(5) 0.017(4) 0.012(4) 0.006(4)
C48 0.101(8) 0.088(7) 0.066(6) 0.032(6) 0.028(6) 0.026(6)
O49 0.141(8) 0.091(6) 0.074(6) 0.035(5) 0.025(5) 0.037(6)
O50 0.141(7) 0.108(6) 0.065(5) 0.040(5) 0.026(5) 0.053(6)
N51 0.086(5) 0.053(4) 0.090(6) 0.020(4) 0.037(4) 0.011(4)
C52 0.084(6) 0.042(5) 0.115(8) 0.011(6) 0.032(5) 0.004(4)
C53 0.081(6) 0.049(6) 0.177(9) 0.025(7) 0.049(6) 0.012(4)
C54 0.101(7) 0.059(7) 0.193(10) 0.050(8) 0.086(7) 0.032(6)
C55 0.118(8) 0.076(8) 0.160(9) 0.072(7) 0.075(6) 0.038(6)
C56 0.096(7) 0.063(6) 0.108(7) 0.041(6) 0.043(6) 0.020(5)
C57 0.081(8) 0.057(8) 0.220(12) -0.013(10) 0.042(8) -0.002(6)
O58 0.127(9) 0.171(13) 0.188(11) -0.029(10) 0.012(9) 0.022(8)
O59 0.096(7) 0.086(7) 0.396(19) 0.051(10) 0.063(9) -0.010(5)
C60 0.163(13) 0.150(14) 0.188(11) 0.124(12) 0.102(8) 0.068(9)
O61 0.181(11) 0.207(14) 0.165(10) 0.120(10) 0.079(7) 0.077(8)
O62 0.284(15) 0.184(13) 0.280(17) 0.171(13) 0.158(13) 0.041(10)
P70 0.058(2) 0.056(2) 0.062(2) 0.0168(18) 0.0145(17) 0.0119(16)
F71 0.064(3) 0.058(3) 0.093(4) 0.021(3) 0.020(3) 0.014(3)
F72 0.066(3) 0.080(4) 0.063(4) 0.019(3) 0.021(3) 0.016(3)
F73 0.051(3) 0.072(3) 0.073(4) 0.018(3) 0.011(2) 0.010(2)
P80 0.082(4) 0.089(4) 0.100(5) 0.005(4) 0.028(4) 0.016(3)
F81 0.126(11) 0.195(17) 0.140(13) -0.021(13) -0.015(10) 0.053(13)
F82 0.183(19) 0.117(10) 0.35(3) 0.079(12) 0.075(19) -0.048(12)
O83 0.124(10) 0.099(11) 0.083(11) 0.009(9) 0.041(9) -0.008(9)
O84 0.154(15) 0.184(14) 0.096(8) 0.101(9) 0.076(9) 0.113(13)
O101 0.094(6) 0.103(6) 0.161(8) 0.064(6) 0.012(6) 0.021(5)

_geom_special_details            
; 
 All esds (except the esd in the dihedral angle between two l.s. planes) 
 are estimated using the full covariance matrix.  The cell esds are taken 
 into account individually in the estimation of esds in distances, angles 
 and torsion angles; correlations between esds in cell parameters are only 
 used when they are defined by crystal symmetry.  An approximate (isotropic) 
 treatment of cell esds is used for estimating esds involving l.s. planes. 
;

loop_
_geom_bond_atom_site_label_1
_geom_bond_atom_site_label_2
_geom_bond_distance
_geom_bond_site_symmetry_2
_geom_bond_publ_flag
Pt C2 2.044(11) . ?
Pt C1 2.071(10) . ?
Pt C41 2.093(10) . ?
Pt N22 2.173(8) . ?
Pt N11 2.183(8) . ?
Pt N51 2.204(9) . ?
C1 H1A 0.9800 . ?
C1 H1B 0.9800 . ?
C1 H1C 0.9800 . ?
C2 H2A 0.9800 . ?
C2 H2B 0.9800 . ?
C2 H2C 0.9800 . ?
N11 C16 1.342(13) . ?
N11 C12 1.351(14) . ?
C12 C13 1.405(17) . ?
C12 H12A 0.9500 . ?
C13 C14 1.360(19) . ?
C13 C23 1.47(2) . ?
C14 C15 1.381(17) . ?
C14 H14A 0.9500 . ?
C15 C16 1.373(14) . ?
C15 H15A 0.9500 . ?
C16 C17 1.463(15) . ?
C17 N22 1.339(11) . ?
C17 C18 1.390(14) . ?
C18 C19 1.381(15) . ?
C18 H18A 0.9500 . ?
C19 C20 1.382(14) . ?
C19 H19A 0.9500 . ?
C20 C21 1.375(13) . ?
C20 N28 1.395(13) . ?
C21 N22 1.307(12) . ?
C21 H21A 0.9500 . ?
C23 O24 1.25(2) . ?
C23 O25 1.36(2) . ?
O25 C26 1.65(3) . ?
C26 C27B 1.44(4) . ?
C26 C27A 1.44(4) . ?
C26 H26A 0.9900 . ?
C26 H26B 0.9900 . ?
C26 H26C 0.9900 . ?
C26 H26D 0.9900 . ?
C27A H26C 0.5265 . ?
C27A H27A 0.9800 . ?
C27A H27B 0.9800 . ?
C27A H27C 0.9800 . ?
C27B H27D 0.9800 . ?
C27B H27E 0.9800 . ?
C27B H27F 0.9800 . ?
N28 C29 1.391(16) . ?
N28 H28A 0.8800 . ?
C29 O30 1.197(16) . ?
C29 O31 1.321(17) . ?
O31 C32 1.48(2) . ?
C32 C33 1.42(3) . ?
C32 H32A 0.9900 . ?
C32 H32B 0.9900 . ?
C33 H33A 0.9800 . ?
C33 H33B 0.9800 . ?
C33 H33C 0.9800 . ?
C41 C42 1.456(13) . ?
C41 H41A 0.9900 . ?
C41 H41B 0.9900 . ?
C42 C47 1.365(12) . ?
C42 C43 1.390(13) . ?
C43 C44 1.377(14) . ?
C43 H43A 0.9500 . ?
C44 C45 1.401(14) . ?
C44 H44A 0.9500 . ?
C45 C46 1.354(14) . ?
C45 C48 1.467(15) . ?
C46 C47 1.378(13) . ?
C46 H46A 0.9500 . ?
C47 H47A 0.9500 . ?
C48 O49 1.241(13) . ?
C48 O50 1.271(13) . ?
O49 H49A 0.8400 . ?
O50 H50A 0.8400 . ?
N51 C52 1.333(14) . ?
N51 C56 1.335(14) . ?
C52 C53 1.356(16) . ?
C52 H52A 0.9500 . ?
C53 C54 1.41(2) . ?
C53 C57 1.51(2) . ?
C54 C55 1.36(2) . ?
C54 H54A 0.9500 . ?
C55 C56 1.388(16) . ?
C55 C60 1.51(2) . ?
C56 H56A 0.9500 . ?
C57 O58 1.26(2) . ?
C57 O59 1.27(2) . ?
O59 H59A 0.8400 . ?
C60 O62 1.26(2) . ?
C60 O61 1.28(2) . ?
O61 H61A 0.8400 . ?
P70 F71 1.581(5) 2_455 ?
P70 F71 1.581(5) . ?
P70 F73 1.595(5) . ?
P70 F73 1.595(5) 2_455 ?
P70 F72 1.601(5) 2_455 ?
P70 F72 1.601(5) . ?
P80 O84 1.251(18) . ?
P80 O83 1.348(18) . ?
P80 F82 1.52(2) . ?
P80 F81 1.540(19) . ?
O101 C105 1.385(14) . ?
O101 C102 1.388(14) . ?
C102 C103 1.51(2) . ?
C102 H10A 0.9900 . ?
C102 H10B 0.9900 . ?
C103 C104 1.42(5) . ?
C103 H10C 0.9900 . ?
C103 H10D 0.9900 . ?
C104 C105 1.50(2) . ?
C104 H10E 0.9900 . ?
C104 H10F 0.9900 . ?
C105 H10G 0.9900 . ?
C105 H10H 0.9900 . ?
C107 C108 1.26(5) . ?
C107 H10K 0.9900 . ?
C107 H10L 0.9900 . ?
C108 H10M 0.9900 . ?
C108 H10N 0.9900 . ?
C201 C202 1.538(10) . ?
C202 C203 1.538(10) . ?
C203 C204 1.539(10) . ?
C204 C205 1.530(10) . ?
C205 C206 1.537(10) . ?

loop_
_geom_angle_atom_site_label_1
_geom_angle_atom_site_label_2
_geom_angle_atom_site_label_3
_geom_angle
_geom_angle_site_symmetry_1
_geom_angle_site_symmetry_3
_geom_angle_publ_flag
C2 Pt C1 85.5(5) . . ?
C2 Pt C41 90.5(5) . . ?
C1 Pt C41 86.0(4) . . ?
C2 Pt N22 174.2(4) . . ?
C1 Pt N22 98.9(4) . . ?
C41 Pt N22 93.6(3) . . ?
C2 Pt N11 99.6(4) . . ?
C1 Pt N11 174.7(4) . . ?
C41 Pt N11 92.5(3) . . ?
N22 Pt N11 76.1(3) . . ?
C2 Pt N51 90.1(4) . . ?
C1 Pt N51 92.6(4) . . ?
C41 Pt N51 178.4(4) . . ?
N22 Pt N51 85.9(3) . . ?
N11 Pt N51 88.8(3) . . ?
Pt C1 H1A 109.5 . . ?
Pt C1 H1B 109.5 . . ?
H1A C1 H1B 109.5 . . ?
Pt C1 H1C 109.5 . . ?
H1A C1 H1C 109.5 . . ?
H1B C1 H1C 109.5 . . ?
Pt C2 H2A 109.5 . . ?
Pt C2 H2B 109.5 . . ?
H2A C2 H2B 109.5 . . ?
Pt C2 H2C 109.5 . . ?
H2A C2 H2C 109.5 . . ?
H2B C2 H2C 109.5 . . ?
C16 N11 C12 119.6(10) . . ?
C16 N11 Pt 114.7(7) . . ?
C12 N11 Pt 125.4(8) . . ?
N11 C12 C13 121.1(12) . . ?
N11 C12 H12A 119.4 . . ?
C13 C12 H12A 119.4 . . ?
C14 C13 C12 117.4(12) . . ?
C14 C13 C23 120.1(15) . . ?
C12 C13 C23 122.4(16) . . ?
C13 C14 C15 122.0(12) . . ?
C13 C14 H14A 119.0 . . ?
C15 C14 H14A 119.0 . . ?
C16 C15 C14 117.6(12) . . ?
C16 C15 H15A 121.2 . . ?
C14 C15 H15A 121.2 . . ?
N11 C16 C15 122.2(11) . . ?
N11 C16 C17 116.7(8) . . ?
C15 C16 C17 120.8(11) . . ?
N22 C17 C18 119.4(10) . . ?
N22 C17 C16 117.4(9) . . ?
C18 C17 C16 123.2(9) . . ?
C19 C18 C17 119.8(9) . . ?
C19 C18 H18A 120.1 . . ?
C17 C18 H18A 120.1 . . ?
C18 C19 C20 119.4(9) . . ?
C18 C19 H19A 120.3 . . ?
C20 C19 H19A 120.3 . . ?
C21 C20 C19 117.1(10) . . ?
C21 C20 N28 117.1(9) . . ?
C19 C20 N28 125.8(10) . . ?
N22 C21 C20 123.7(9) . . ?
N22 C21 H21A 118.2 . . ?
C20 C21 H21A 118.2 . . ?
C21 N22 C17 120.6(8) . . ?
C21 N22 Pt 124.4(6) . . ?
C17 N22 Pt 114.7(7) . . ?
O24 C23 O25 124.8(17) . . ?
O24 C23 C13 123(2) . . ?
O25 C23 C13 111.9(17) . . ?
C23 O25 C26 113.6(16) . . ?
C27B C26 C27A 94(4) . . ?
C27B C26 O25 111(3) . . ?
C27A C26 O25 92(4) . . ?
C27B C26 H26A 126.4 . . ?
C27A C26 H26A 113.2 . . ?
O25 C26 H26A 113.2 . . ?
C27B C26 H26B 20.3 . . ?
C27A C26 H26B 113.2 . . ?
O25 C26 H26B 113.2 . . ?
H26A C26 H26B 110.6 . . ?
C27B C26 H26C 94.0 . . ?
C27A C26 H26C 12.9 . . ?
O25 C26 H26C 104.2 . . ?
H26A C26 H26C 103.1 . . ?
H26B C26 H26C 111.9 . . ?
C27B C26 H26D 127.7 . . ?
C27A C26 H26D 117.7 . . ?
O25 C26 H26D 108.6 . . ?
H26A C26 H26D 5.8 . . ?
H26B C26 H26D 110.5 . . ?
H26C C26 H26D 108.1 . . ?
C26 C27A H26C 24.9 . . ?
C26 C27A H27A 109.5 . . ?
H26C C27A H27A 86.5 . . ?
C26 C27A H27B 109.5 . . ?
H26C C27A H27B 128.5 . . ?
H27A C27A H27B 109.5 . . ?
C26 C27A H27C 109.5 . . ?
H26C C27A H27C 110.2 . . ?
H27A C27A H27C 109.5 . . ?
H27B C27A H27C 109.5 . . ?
C26 C27B H27D 109.5 . . ?
C26 C27B H27E 109.4 . . ?
H27D C27B H27E 109.5 . . ?
C26 C27B H27F 109.5 . . ?
H27D C27B H27F 109.5 . . ?
H27E C27B H27F 109.5 . . ?
C29 N28 C20 128.0(11) . . ?
C29 N28 H28A 116.0 . . ?
C20 N28 H28A 116.0 . . ?
O30 C29 O31 128.1(14) . . ?
O30 C29 N28 122.5(15) . . ?
O31 C29 N28 109.4(12) . . ?
C29 O31 C32 113.1(14) . . ?
C33 C32 O31 107(2) . . ?
C33 C32 H32A 110.4 . . ?
O31 C32 H32A 110.4 . . ?
C33 C32 H32B 110.4 . . ?
O31 C32 H32B 110.4 . . ?
H32A C32 H32B 108.6 . . ?
C32 C33 H33A 109.5 . . ?
C32 C33 H33B 109.5 . . ?
H33A C33 H33B 109.5 . . ?
C32 C33 H33C 109.5 . . ?
H33A C33 H33C 109.5 . . ?
H33B C33 H33C 109.5 . . ?
C42 C41 Pt 114.4(7) . . ?
C42 C41 H41A 108.7 . . ?
Pt C41 H41A 108.7 . . ?
C42 C41 H41B 108.7 . . ?
Pt C41 H41B 108.7 . . ?
H41A C41 H41B 107.6 . . ?
C47 C42 C43 116.6(9) . . ?
C47 C42 C41 121.3(9) . . ?
C43 C42 C41 122.1(9) . . ?
C44 C43 C42 122.0(10) . . ?
C44 C43 H43A 119.0 . . ?
C42 C43 H43A 119.0 . . ?
C43 C44 C45 119.3(10) . . ?
C43 C44 H44A 120.4 . . ?
C45 C44 H44A 120.4 . . ?
C46 C45 C44 119.0(9) . . ?
C46 C45 C48 121.4(10) . . ?
C44 C45 C48 119.6(10) . . ?
C45 C46 C47 120.5(10) . . ?
C45 C46 H46A 119.8 . . ?
C47 C46 H46A 119.8 . . ?
C42 C47 C46 122.6(10) . . ?
C42 C47 H47A 118.7 . . ?
C46 C47 H47A 118.7 . . ?
O49 C48 O50 122.4(11) . . ?
O49 C48 C45 118.4(11) . . ?
O50 C48 C45 119.2(11) . . ?
C48 O49 H49A 109.5 . . ?
C48 O50 H50A 109.5 . . ?
C52 N51 C56 120.5(10) . . ?
C52 N51 Pt 122.1(8) . . ?
C56 N51 Pt 117.4(8) . . ?
N51 C52 C53 122.8(14) . . ?
N51 C52 H52A 118.6 . . ?
C53 C52 H52A 118.6 . . ?
C52 C53 C54 117.2(14) . . ?
C52 C53 C57 119.3(17) . . ?
C54 C53 C57 123.5(14) . . ?
C55 C54 C53 120.0(13) . . ?
C55 C54 H54A 120.0 . . ?
C53 C54 H54A 120.0 . . ?
C54 C55 C56 119.4(15) . . ?
C54 C55 C60 123.0(15) . . ?
C56 C55 C60 117.4(16) . . ?
N51 C56 C55 120.1(13) . . ?
N51 C56 H56A 120.0 . . ?
C55 C56 H56A 120.0 . . ?
O58 C57 O59 128(2) . . ?
O58 C57 C53 118.1(16) . . ?
O59 C57 C53 113(2) . . ?
C57 O59 H59A 109.5 . . ?
O62 C60 O61 125(2) . . ?
O62 C60 C55 119(2) . . ?
O61 C60 C55 116.2(16) . . ?
C60 O61 H61A 109.5 . . ?
F71 P70 F71 180.0 2_455 . ?
F71 P70 F73 90.2(3) 2_455 . ?
F71 P70 F73 89.8(3) . . ?
F71 P70 F73 89.8(3) 2_455 2_455 ?
F71 P70 F73 90.2(3) . 2_455 ?
F73 P70 F73 180.0 . 2_455 ?
F71 P70 F72 90.6(3) 2_455 2_455 ?
F71 P70 F72 89.4(3) . 2_455 ?
F73 P70 F72 89.3(3) . 2_455 ?
F73 P70 F72 90.7(3) 2_455 2_455 ?
F71 P70 F72 89.4(3) 2_455 . ?
F71 P70 F72 90.6(3) . . ?
F73 P70 F72 90.7(3) . . ?
F73 P70 F72 89.3(3) 2_455 . ?
F72 P70 F72 180.0 2_455 . ?
O84 P80 O83 131.2(14) . . ?
O84 P80 F82 105.3(17) . . ?
O83 P80 F82 110.7(14) . . ?
O84 P80 F81 108.0(11) . . ?
O83 P80 F81 103.6(13) . . ?
F82 P80 F81 90.4(14) . . ?
C105 O101 C102 107.1(12) . . ?
O101 C102 C103 103(2) . . ?
O101 C102 H10A 111.3 . . ?
C103 C102 H10A 111.3 . . ?
O101 C102 H10B 111.3 . . ?
C103 C102 H10B 111.3 . . ?
H10A C102 H10B 109.2 . . ?
C104 C103 C102 103(3) . . ?
C104 C103 H10C 111.1 . . ?
C102 C103 H10C 111.1 . . ?
C104 C103 H10D 111.1 . . ?
C102 C103 H10D 111.1 . . ?
H10C C103 H10D 109.1 . . ?
C103 C104 C105 104(2) . . ?
C103 C104 H10E 111.1 . . ?
C105 C104 H10E 111.1 . . ?
C103 C104 H10F 111.1 . . ?
C105 C104 H10F 111.1 . . ?
H10E C104 H10F 109.0 . . ?
O101 C105 C104 107.8(19) . . ?
O101 C105 H10G 110.1 . . ?
C104 C105 H10G 110.1 . . ?
O101 C105 H10H 110.1 . . ?
C104 C105 H10H 110.1 . . ?
H10G C105 H10H 108.5 . . ?
C108 C107 H10K 109.8 . . ?
C108 C107 H10L 109.8 . . ?
H10K C107 H10L 108.2 . . ?
C107 C108 H10M 110.3 . . ?
C107 C108 H10N 110.3 . . ?
H10M C108 H10N 108.6 . . ?
C203 C202 C201 110.2(10) . . ?
C202 C203 C204 109.9(10) . . ?
C205 C204 C203 111.1(10) . . ?
C204 C205 C206 111.4(10) . . ?

loop_
_geom_torsion_atom_site_label_1
_geom_torsion_atom_site_label_2
_geom_torsion_atom_site_label_3
_geom_torsion_atom_site_label_4
_geom_torsion
_geom_torsion_site_symmetry_1
_geom_torsion_site_symmetry_2
_geom_torsion_site_symmetry_3
_geom_torsion_site_symmetry_4
_geom_torsion_publ_flag
C2 Pt N11 C16 -174.3(7) . . . . ?
C1 Pt N11 C16 21(4) . . . . ?
C41 Pt N11 C16 94.8(7) . . . . ?
N22 Pt N11 C16 1.7(6) . . . . ?
N51 Pt N11 C16 -84.4(7) . . . . ?
C2 Pt N11 C12 11.7(9) . . . . ?
C1 Pt N11 C12 -153(4) . . . . ?
C41 Pt N11 C12 -79.2(9) . . . . ?
N22 Pt N11 C12 -172.3(9) . . . . ?
N51 Pt N11 C12 101.6(9) . . . . ?
C16 N11 C12 C13 -2.3(15) . . . . ?
Pt N11 C12 C13 171.5(7) . . . . ?
N11 C12 C13 C14 2.5(16) . . . . ?
N11 C12 C13 C23 -175.8(13) . . . . ?
C12 C13 C14 C15 -1.5(18) . . . . ?
C23 C13 C14 C15 176.9(12) . . . . ?
C13 C14 C15 C16 0.2(17) . . . . ?
C12 N11 C16 C15 0.9(14) . . . . ?
Pt N11 C16 C15 -173.5(7) . . . . ?
C12 N11 C16 C17 175.4(8) . . . . ?
Pt N11 C16 C17 1.0(10) . . . . ?
C14 C15 C16 N11 0.1(15) . . . . ?
C14 C15 C16 C17 -174.1(9) . . . . ?
N11 C16 C17 N22 -5.0(12) . . . . ?
C15 C16 C17 N22 169.5(8) . . . . ?
N11 C16 C17 C18 173.4(9) . . . . ?
C15 C16 C17 C18 -12.0(14) . . . . ?
N22 C17 C18 C19 0.4(14) . . . . ?
C16 C17 C18 C19 -178.1(9) . . . . ?
C17 C18 C19 C20 -2.9(15) . . . . ?
C18 C19 C20 C21 3.3(14) . . . . ?
C18 C19 C20 N28 -178.5(9) . . . . ?
C19 C20 C21 N22 -1.4(14) . . . . ?
N28 C20 C21 N22 -179.7(8) . . . . ?
C20 C21 N22 C17 -1.2(14) . . . . ?
C20 C21 N22 Pt 172.0(7) . . . . ?
C18 C17 N22 C21 1.7(13) . . . . ?
C16 C17 N22 C21 -179.8(8) . . . . ?
C18 C17 N22 Pt -172.1(7) . . . . ?
C16 C17 N22 Pt 6.4(10) . . . . ?
C2 Pt N22 C21 -134(4) . . . . ?
C1 Pt N22 C21 3.9(8) . . . . ?
C41 Pt N22 C21 90.4(7) . . . . ?
N11 Pt N22 C21 -177.9(8) . . . . ?
N51 Pt N22 C21 -88.1(7) . . . . ?
C2 Pt N22 C17 39(4) . . . . ?
C1 Pt N22 C17 177.4(6) . . . . ?
C41 Pt N22 C17 -96.1(6) . . . . ?
N11 Pt N22 C17 -4.4(6) . . . . ?
N51 Pt N22 C17 85.4(6) . . . . ?
C14 C13 C23 O24 -5(3) . . . . ?
C12 C13 C23 O24 173.6(16) . . . . ?
C14 C13 C23 O25 -178.3(14) . . . . ?
C12 C13 C23 O25 0(2) . . . . ?
O24 C23 O25 C26 -1(3) . . . . ?
C13 C23 O25 C26 172.6(14) . . . . ?
C23 O25 C26 C27B -44(3) . . . . ?
C23 O25 C26 C27A 50(4) . . . . ?
C21 C20 N28 C29 -178.0(11) . . . . ?
C19 C20 N28 C29 3.7(18) . . . . ?
C20 N28 C29 O30 -3(2) . . . . ?
C20 N28 C29 O31 179.1(10) . . . . ?
O30 C29 O31 C32 4(3) . . . . ?
N28 C29 O31 C32 -178.7(16) . . . . ?
C29 O31 C32 C33 174(2) . . . . ?
C2 Pt C41 C42 -82.7(8) . . . . ?
C1 Pt C41 C42 -168.1(8) . . . . ?
N22 Pt C41 C42 93.2(7) . . . . ?
N11 Pt C41 C42 17.0(8) . . . . ?
N51 Pt C41 C42 165(12) . . . . ?
Pt C41 C42 C47 -90.1(10) . . . . ?
Pt C41 C42 C43 90.3(10) . . . . ?
C47 C42 C43 C44 0.2(14) . . . . ?
C41 C42 C43 C44 179.8(9) . . . . ?
C42 C43 C44 C45 1.8(16) . . . . ?
C43 C44 C45 C46 -2.2(15) . . . . ?
C43 C44 C45 C48 177.6(10) . . . . ?
C44 C45 C46 C47 0.7(15) . . . . ?
C48 C45 C46 C47 -179.1(10) . . . . ?
C43 C42 C47 C46 -1.8(14) . . . . ?
C41 C42 C47 C46 178.6(9) . . . . ?
C45 C46 C47 C42 1.4(15) . . . . ?
C46 C45 C48 O49 3.0(17) . . . . ?
C44 C45 C48 O49 -176.8(11) . . . . ?
C46 C45 C48 O50 -176.3(11) . . . . ?
C44 C45 C48 O50 4.0(17) . . . . ?
C2 Pt N51 C52 52.8(9) . . . . ?
C1 Pt N51 C52 138.3(8) . . . . ?
C41 Pt N51 C52 166(12) . . . . ?
N22 Pt N51 C52 -123.0(8) . . . . ?
N11 Pt N51 C52 -46.8(8) . . . . ?
C2 Pt N51 C56 -129.6(8) . . . . ?
C1 Pt N51 C56 -44.1(8) . . . . ?
C41 Pt N51 C56 -17(12) . . . . ?
N22 Pt N51 C56 54.6(8) . . . . ?
N11 Pt N51 C56 130.8(8) . . . . ?
C56 N51 C52 C53 -0.7(16) . . . . ?
Pt N51 C52 C53 176.8(8) . . . . ?
N51 C52 C53 C54 -0.4(16) . . . . ?
N51 C52 C53 C57 177.5(11) . . . . ?
C52 C53 C54 C55 2.8(18) . . . . ?
C57 C53 C54 C55 -175.1(12) . . . . ?
C53 C54 C55 C56 -4.0(19) . . . . ?
C53 C54 C55 C60 -179.3(13) . . . . ?
C52 N51 C56 C55 -0.4(16) . . . . ?
Pt N51 C56 C55 -178.1(8) . . . . ?
C54 C55 C56 N51 2.8(18) . . . . ?
C60 C55 C56 N51 178.4(12) . . . . ?
C52 C53 C57 O58 7(2) . . . . ?
C54 C53 C57 O58 -174.9(16) . . . . ?
C52 C53 C57 O59 178.4(12) . . . . ?
C54 C53 C57 O59 -4(2) . . . . ?
C54 C55 C60 O62 -12(2) . . . . ?
C56 C55 C60 O62 173.0(15) . . . . ?
C54 C55 C60 O61 176.4(15) . . . . ?
C56 C55 C60 O61 1(2) . . . . ?
C105 O101 C102 C103 -36(2) . . . . ?
O101 C102 C103 C104 40(3) . . . . ?
C102 C103 C104 C105 -28(4) . . . . ?
C102 O101 C105 C104 19(2) . . . . ?
C103 C104 C105 O101 7(3) . . . . ?
C201 C202 C203 C204 -177(6) . . . . ?
C202 C203 C204 C205 -88(5) . . . . ?
C203 C204 C205 C206 -179(4) . . . . ?

loop_
_geom_hbond_atom_site_label_D
_geom_hbond_atom_site_label_H
_geom_hbond_atom_site_label_A
_geom_hbond_distance_DH
_geom_hbond_distance_HA
_geom_hbond_distance_DA
_geom_hbond_angle_DHA
_geom_hbond_site_symmetry_A
N28 H28A O101 0.88 1.91 2.782(13) 169.1 .
O49 H49A O50 0.84 2.14 2.623(11) 116.6 2_556
O50 H50A O49 0.84 1.81 2.623(11) 162.4 2_556
O59 H59A O83 0.84 1.85 2.60(2) 146.5 .
O61 H61A O84 0.84 1.82 2.52(2) 139.3 2_665

_diffrn_measured_fraction_theta_max 0.993
_diffrn_reflns_theta_full        25.03
_diffrn_measured_fraction_theta_full 0.993
_refine_diff_density_max         0.933
_refine_diff_density_min         -1.049
_refine_diff_density_rms         0.135

#===END

  
data_7'
_publ_contact_author_name        Puddephatt
_publ_contact_author_address     
;Department of Chemistry
University of Western Ontario
London, Canada N6A 5B7
;
_publ_contact_author_email       pudd@uwo.ca
_publ_contact_author_phone       519-611-2111
_publ_contact_author_fax         519-611-3022
loop_
_publ_author_name
_publ_author_address
'Puddephatt, R.J.'
;Department of Chemistry
University of Western Ontario
London, Canada N6A 5B7
;

_audit_creation_method           SHELXL-97
_chemical_name_systematic        
; 
 ? 
;
_chemical_name_common            ?
_chemical_melting_point          ?
_chemical_formula_moiety         'C34 H37 N4 O10 Pt, C3 H6 O, F2 O2 P'
_chemical_formula_sum            'C37 H43 F2 N4 O13 P Pt'
_chemical_formula_weight         1015.81

loop_
_atom_type_symbol
_atom_type_description
_atom_type_scat_dispersion_real
_atom_type_scat_dispersion_imag
_atom_type_scat_source
C C 0.0033 0.0016 'International Tables Vol C Tables 4.2.6.8 and 6.1.1.4'
H H 0.0000 0.0000 'International Tables Vol C Tables 4.2.6.8 and 6.1.1.4'
N N 0.0061 0.0033 'International Tables Vol C Tables 4.2.6.8 and 6.1.1.4'
O O 0.0106 0.0060 'International Tables Vol C Tables 4.2.6.8 and 6.1.1.4'
F F 0.0171 0.0103 'International Tables Vol C Tables 4.2.6.8 and 6.1.1.4'
P P 0.1023 0.0942 'International Tables Vol C Tables 4.2.6.8 and 6.1.1.4'
Pt Pt -1.7033 8.3905 'International Tables Vol C Tables 4.2.6.8 and 6.1.1.4'

_symmetry_cell_setting           Triclinic
_symmetry_space_group_name_H-M   'P -1'
_symmetry_space_group_name_Hall  '-P 1'

loop_
_symmetry_equiv_pos_as_xyz
'x, y, z'
'-x, -y, -z'

_cell_length_a                   10.9552(6)
_cell_length_b                   11.2806(6)
_cell_length_c                   17.7705(11)
_cell_angle_alpha                92.383(3)
_cell_angle_beta                 104.385(3)
_cell_angle_gamma                107.834(3)
_cell_volume                     2008.5(2)
_cell_formula_units_Z            2
_cell_measurement_temperature    150(2)
_cell_measurement_reflns_used    50475
_cell_measurement_theta_min      2.04
_cell_measurement_theta_max      27.48

_exptl_crystal_description       plate
_exptl_crystal_colour            colourless
_exptl_crystal_size_max          0.34
_exptl_crystal_size_mid          0.24
_exptl_crystal_size_min          0.04
_exptl_crystal_density_meas      ?
_exptl_crystal_density_diffrn    1.680
_exptl_crystal_density_method    'not measured'
_exptl_crystal_F_000             1016
_exptl_absorpt_coefficient_mu    3.611
_exptl_absorpt_correction_type   multi-scan
_exptl_absorpt_correction_T_min  0.3753
_exptl_absorpt_correction_T_max  0.8765
_exptl_absorpt_process_details   'DENZO-SMN (Otwinowski & Minor, 1997)'

_exptl_special_details           
; 
 ? 
;

_diffrn_ambient_temperature      150(2)
_diffrn_radiation_wavelength     0.71073
_diffrn_radiation_type           MoK\a
_diffrn_radiation_source         'fine-focus sealed tube'
_diffrn_radiation_monochromator  graphite
_diffrn_measurement_device_type  'Nonius Kappa-CCD'
_diffrn_measurement_method       '\f scans, and \w scans with \k offsets'
_diffrn_detector_area_resol_mean ?
_diffrn_standards_number         0
_diffrn_standards_interval_count ?
_diffrn_standards_interval_time  ?
_diffrn_standards_decay_%        ?
_diffrn_reflns_number            18860
_diffrn_reflns_av_R_equivalents  0.063
_diffrn_reflns_av_sigmaI/netI    0.0707
_diffrn_reflns_limit_h_min       -13
_diffrn_reflns_limit_h_max       13
_diffrn_reflns_limit_k_min       -13
_diffrn_reflns_limit_k_max       13
_diffrn_reflns_limit_l_min       -20
_diffrn_reflns_limit_l_max       21
_diffrn_reflns_theta_min         2.62
_diffrn_reflns_theta_max         25.03
_reflns_number_total             6949
_reflns_number_gt                5615
_reflns_threshold_expression     I>2\s(I)

_computing_data_collection       'COLLECT (Nonius, 1997-2001)'
_computing_cell_refinement       'DENZO-SMN (Otwinowski & Minor, 1997)'
_computing_data_reduction        DENZO-SMN
_computing_structure_solution    'SHELXS-97 (Sheldrick, 1997)'
_computing_structure_refinement  'SHELXL-97 (Sheldrick, 1997)'
_computing_molecular_graphics    'SHELXTL/PC (Sheldrick, 2001)'
_computing_publication_material  SHELXTL/PC

_refine_special_details          
; 
 Refinement of F^2^ against ALL reflections.  The weighted R-factor wR and 
 goodness of fit S are based on F^2^, conventional R-factors R are based 
 on F, with F set to zero for negative F^2^. The threshold expression of 
 F^2^ > 2sigma(F^2^) is used only for calculating R-factors(gt) etc. and is 
 not relevant to the choice of reflections for refinement.  R-factors based 
 on F^2^ are statistically about twice as large as those based on F, and R- 
 factors based on ALL data will be even larger. 
;

_refine_ls_structure_factor_coef Fsqd
_refine_ls_matrix_type           full
_refine_ls_weighting_scheme      calc
_refine_ls_weighting_details     
'calc w=1/[\s^2^(Fo^2^)+(0.0594P)^2^+6.2719P] where P=(Fo^2^+2Fc^2^)/3'
_atom_sites_solution_primary     direct
_atom_sites_solution_secondary   difmap
_atom_sites_solution_hydrogens   geom
_refine_ls_hydrogen_treatment    constr
_refine_ls_extinction_method     none
_refine_ls_extinction_coef       ?
_refine_ls_number_reflns         6949
_refine_ls_number_parameters     532
_refine_ls_number_restraints     476
_refine_ls_R_factor_all          0.0691
_refine_ls_R_factor_gt           0.0496
_refine_ls_wR_factor_ref         0.1246
_refine_ls_wR_factor_gt          0.1150
_refine_ls_goodness_of_fit_ref   1.024
_refine_ls_restrained_S_all      0.993
_refine_ls_shift/su_max          0.001
_refine_ls_shift/su_mean         0.000

loop_
_atom_site_label
_atom_site_type_symbol
_atom_site_fract_x
_atom_site_fract_y
_atom_site_fract_z
_atom_site_U_iso_or_equiv
_atom_site_adp_type
_atom_site_occupancy
_atom_site_symmetry_multiplicity
_atom_site_calc_flag
_atom_site_refinement_flags
_atom_site_disorder_assembly
_atom_site_disorder_group
Pt Pt 0.75061(3) 0.09302(2) 0.423957(18) 0.03529(12) Uani 1 1 d U . .
C1 C 0.7417(6) -0.0023(6) 0.5227(4) 0.0288(14) Uani 1 1 d U . .
H1A H 0.7448 -0.0869 0.5112 0.043 Uiso 1 1 calc R . .
H1B H 0.6584 -0.0083 0.5359 0.043 Uiso 1 1 calc R . .
H1C H 0.8177 0.0438 0.5671 0.043 Uiso 1 1 calc R . .
C2 C 0.5723(7) -0.0504(6) 0.3684(4) 0.0339(15) Uani 1 1 d U . .
H2A H 0.5476 -0.0434 0.3123 0.051 Uiso 1 1 calc R . .
H2B H 0.5015 -0.0428 0.3910 0.051 Uiso 1 1 calc R . .
H2C H 0.5842 -0.1321 0.3761 0.051 Uiso 1 1 calc R . .
N11 N 0.7747(6) 0.1989(5) 0.3273(4) 0.0333(12) Uani 1 1 d U . .
C12 C 0.6925(7) 0.1674(7) 0.2541(5) 0.0396(16) Uani 1 1 d U . .
H12A H 0.6123 0.0983 0.2445 0.048 Uiso 1 1 calc R . .
C13 C 0.7196(7) 0.2309(7) 0.1929(5) 0.0396(16) Uani 1 1 d U . .
C14 C 0.8348(7) 0.3340(7) 0.2069(5) 0.0415(17) Uani 1 1 d U . .
H14A H 0.8560 0.3797 0.1655 0.050 Uiso 1 1 calc R . .
C15 C 0.9170(7) 0.3682(6) 0.2814(5) 0.0386(16) Uani 1 1 d U . .
H15A H 0.9953 0.4396 0.2923 0.046 Uiso 1 1 calc R . .
C16 C 0.8874(7) 0.3000(6) 0.3409(4) 0.0345(14) Uani 1 1 d U . .
C17 C 0.9717(7) 0.3287(6) 0.4221(4) 0.0334(14) Uani 1 1 d U . .
C18 C 1.0879(7) 0.4286(6) 0.4490(5) 0.0374(16) Uani 1 1 d U . .
H18A H 1.1167 0.4842 0.4134 0.045 Uiso 1 1 calc R . .
C19 C 1.1627(7) 0.4503(7) 0.5245(5) 0.0383(16) Uani 1 1 d U . .
H19A H 1.2436 0.5190 0.5413 0.046 Uiso 1 1 calc R . .
C20 C 1.1191(7) 0.3700(6) 0.5776(5) 0.0355(15) Uani 1 1 d U . .
C21 C 1.0048(7) 0.2694(6) 0.5472(4) 0.0350(15) Uani 1 1 d U . .
H21A H 0.9762 0.2117 0.5818 0.042 Uiso 1 1 calc R . .
N22 N 0.9323(5) 0.2470(5) 0.4741(4) 0.0328(12) Uani 1 1 d U . .
C23 C 0.6223(8) 0.1837(8) 0.1138(5) 0.0467(18) Uani 1 1 d U . .
O24 O 0.5140(6) 0.1073(6) 0.1037(4) 0.0702(18) Uani 1 1 d U . .
O25 O 0.6715(6) 0.2363(6) 0.0573(3) 0.0563(14) Uani 1 1 d U . .
C26 C 0.5840(10) 0.2001(10) -0.0218(5) 0.068(3) Uani 1 1 d U . .
H26A H 0.5152 0.2418 -0.0293 0.081 Uiso 1 1 calc R . .
H26B H 0.5386 0.1081 -0.0312 0.081 Uiso 1 1 calc R . .
C27 C 0.6643(13) 0.2377(15) -0.0770(7) 0.109(5) Uani 1 1 d U . .
H27A H 0.7150 0.3276 -0.0645 0.163 Uiso 1 1 calc R . .
H27B H 0.6055 0.2209 -0.1305 0.163 Uiso 1 1 calc R . .
H27C H 0.7261 0.1897 -0.0729 0.163 Uiso 1 1 calc R . .
N28 N 1.1838(6) 0.3817(6) 0.6560(4) 0.0406(14) Uani 1 1 d U . .
H28A H 1.1488 0.3227 0.6827 0.049 Uiso 1 1 calc R . .
C29 C 1.2965(7) 0.4757(7) 0.6965(5) 0.0399(16) Uani 1 1 d U . .
O30 O 1.3528(5) 0.5660(5) 0.6702(3) 0.0499(14) Uani 1 1 d U . .
O31 O 1.3306(5) 0.4540(5) 0.7706(3) 0.0464(13) Uani 1 1 d U . .
C32 C 1.4571(8) 0.5398(8) 0.8211(5) 0.051(2) Uani 1 1 d U . .
H32A H 1.5331 0.5221 0.8082 0.061 Uiso 1 1 calc R . .
H32B H 1.4642 0.6279 0.8136 0.061 Uiso 1 1 calc R . .
C33 C 1.4585(10) 0.5202(9) 0.9018(5) 0.063(2) Uani 1 1 d U . .
H33A H 1.3832 0.5385 0.9139 0.094 Uiso 1 1 calc R . .
H33B H 1.5422 0.5760 0.9372 0.094 Uiso 1 1 calc R . .
H33C H 1.4511 0.4327 0.9085 0.094 Uiso 1 1 calc R . .
C41 C 0.8536(7) -0.0223(7) 0.3953(5) 0.0402(16) Uani 1 1 d U . .
H41A H 0.9471 0.0101 0.4282 0.048 Uiso 1 1 calc R . .
H41B H 0.8130 -0.1078 0.4077 0.048 Uiso 1 1 calc R . .
C42 C 0.8533(8) -0.0305(7) 0.3111(5) 0.0465(17) Uani 1 1 d U . .
C43 C 0.9497(8) 0.0534(8) 0.2833(6) 0.0512(19) Uani 1 1 d U . .
H43A H 1.0239 0.1130 0.3199 0.061 Uiso 1 1 calc R . .
C44 C 0.9415(10) 0.0530(9) 0.2054(6) 0.064(2) Uani 1 1 d U . .
H44A H 1.0107 0.1115 0.1897 0.076 Uiso 1 1 calc R . .
C45 C 0.8361(11) -0.0295(10) 0.1490(6) 0.070(2) Uani 1 1 d U . .
C46 C 0.7421(10) -0.1166(9) 0.1753(6) 0.067(2) Uani 1 1 d U . .
H46A H 0.6700 -0.1774 0.1381 0.080 Uiso 1 1 calc R . .
C47 C 0.7489(9) -0.1188(8) 0.2544(6) 0.055(2) Uani 1 1 d U . .
H47A H 0.6822 -0.1806 0.2701 0.066 Uiso 1 1 calc R . .
C48 C 0.8270(15) -0.0149(13) 0.0630(7) 0.100(4) Uani 1 1 d U . .
H48A H 0.7614 0.0289 0.0447 0.120 Uiso 1 1 calc R . .
H48B H 0.9146 0.0417 0.0605 0.120 Uiso 1 1 calc R . .
C49 C 0.7939(15) -0.1164(14) 0.0115(8) 0.100(4) Uani 1 1 d U . .
O50 O 0.7448(12) -0.2258(10) 0.0192(6) 0.135(4) Uani 1 1 d U . .
O51 O 0.8290(14) -0.0924(10) -0.0603(7) 0.146(4) Uani 1 1 d U . .
H51A H 0.7974 -0.1591 -0.0916 0.219 Uiso 1 1 calc R . .
N61 N 0.6386(6) 0.2061(5) 0.4576(4) 0.0369(13) Uani 1 1 d U . .
C62 C 0.6628(7) 0.2567(7) 0.5317(5) 0.0422(17) Uani 1 1 d U . .
H62A H 0.7353 0.2473 0.5704 0.051 Uiso 1 1 calc R . .
C63 C 0.5866(8) 0.3221(6) 0.5541(5) 0.0427(16) Uani 1 1 d U . .
C64 C 0.4792(8) 0.3338(7) 0.4977(5) 0.0438(17) Uani 1 1 d U . .
H64A H 0.4234 0.3757 0.5119 0.053 Uiso 1 1 calc R . .
C65 C 0.4541(7) 0.2846(6) 0.4217(5) 0.0413(16) Uani 1 1 d U . .
C66 C 0.5356(7) 0.2201(6) 0.4041(5) 0.0388(16) Uani 1 1 d U . .
H66A H 0.5172 0.1843 0.3515 0.047 Uiso 1 1 calc R . .
C67 C 0.6158(9) 0.3727(7) 0.6386(5) 0.0482(18) Uani 1 1 d U . .
O68 O 0.5345(6) 0.3994(6) 0.6647(4) 0.0693(18) Uani 1 1 d U . .
O69 O 0.7383(6) 0.3858(5) 0.6788(4) 0.0544(14) Uani 1 1 d U . .
H69A H 0.7541 0.4235 0.7237 0.082 Uiso 1 1 calc R . .
C71 C 0.3435(8) 0.2982(7) 0.3596(6) 0.0474(18) Uani 1 1 d U . .
O72 O 0.2695(6) 0.3532(6) 0.3714(4) 0.0634(17) Uani 1 1 d U . .
O73 O 0.3349(6) 0.2473(6) 0.2892(4) 0.0577(15) Uani 1 1 d U . .
H73A H 0.2690 0.2555 0.2565 0.087 Uiso 1 1 calc R . .
P80 P 0.8486(2) 0.6029(2) 0.87080(14) 0.0562(6) Uani 1 1 d U . .
O81 O 0.8080(7) 0.7062(6) 0.8400(4) 0.0726(18) Uani 1 1 d U . .
O82 O 0.8329(8) 0.4920(7) 0.8211(4) 0.084(2) Uani 1 1 d U . .
F83 F 0.7872(7) 0.5639(7) 0.9378(4) 0.106(2) Uani 1 1 d U . .
F84 F 0.9940(6) 0.6581(7) 0.9206(4) 0.101(2) Uani 1 1 d U . .
C91 C 1.0099(11) 0.2872(11) 0.8451(7) 0.084(3) Uani 1 1 d U . .
H91A H 1.1012 0.3295 0.8427 0.125 Uiso 1 1 calc R . .
H91B H 1.0118 0.2343 0.8875 0.125 Uiso 1 1 calc R . .
H91C H 0.9690 0.3501 0.8551 0.125 Uiso 1 1 calc R . .
C92 C 0.9324(9) 0.2095(9) 0.7709(6) 0.059(2) Uani 1 1 d U . .
C93 C 0.8028(10) 0.1126(11) 0.7672(7) 0.082(3) Uani 1 1 d U . .
H93A H 0.7712 0.0572 0.7175 0.123 Uiso 1 1 calc R . .
H93B H 0.7372 0.1536 0.7709 0.123 Uiso 1 1 calc R . .
H93C H 0.8146 0.0630 0.8108 0.123 Uiso 1 1 calc R . .
O94 O 0.9715(6) 0.2230(6) 0.7122(4) 0.0640(16) Uani 1 1 d U . .

loop_
_atom_site_aniso_label
_atom_site_aniso_U_11
_atom_site_aniso_U_22
_atom_site_aniso_U_33
_atom_site_aniso_U_23
_atom_site_aniso_U_13
_atom_site_aniso_U_12
Pt 0.03015(17) 0.02560(16) 0.0530(2) 0.00618(12) 0.01786(13) 0.00789(11)
C1 0.021(3) 0.016(3) 0.047(4) 0.005(3) 0.015(3) -0.002(3)
C2 0.033(3) 0.021(3) 0.050(4) 0.005(3) 0.022(3) 0.004(3)
N11 0.030(3) 0.028(3) 0.049(3) 0.006(2) 0.019(2) 0.012(2)
C12 0.030(4) 0.034(4) 0.057(4) 0.004(3) 0.013(3) 0.012(3)
C13 0.038(4) 0.037(4) 0.047(4) 0.005(3) 0.014(3) 0.015(3)
C14 0.043(4) 0.042(4) 0.043(4) 0.012(3) 0.019(3) 0.011(3)
C15 0.032(4) 0.026(3) 0.058(4) 0.009(3) 0.019(3) 0.003(3)
C16 0.029(3) 0.034(4) 0.048(4) 0.008(3) 0.018(3) 0.014(3)
C17 0.028(3) 0.025(3) 0.051(4) 0.008(3) 0.016(3) 0.011(3)
C18 0.031(4) 0.029(3) 0.058(4) 0.006(3) 0.023(3) 0.010(3)
C19 0.028(4) 0.030(4) 0.058(4) 0.011(3) 0.016(3) 0.007(3)
C20 0.027(3) 0.030(3) 0.051(4) 0.005(3) 0.013(3) 0.010(3)
C21 0.031(3) 0.030(3) 0.047(4) 0.005(3) 0.014(3) 0.010(3)
N22 0.029(3) 0.025(3) 0.046(3) 0.003(2) 0.015(2) 0.007(2)
C23 0.045(4) 0.047(5) 0.047(4) -0.001(4) 0.013(3) 0.014(4)
O24 0.056(4) 0.073(4) 0.058(4) 0.000(3) 0.010(3) -0.005(3)
O25 0.056(4) 0.061(4) 0.047(3) 0.004(3) 0.015(3) 0.012(3)
C26 0.071(6) 0.085(7) 0.041(4) 0.005(5) 0.010(4) 0.022(6)
C27 0.097(9) 0.154(13) 0.059(6) 0.013(8) 0.038(6) 0.005(9)
N28 0.039(3) 0.033(3) 0.048(3) 0.009(3) 0.016(3) 0.007(3)
C29 0.034(4) 0.038(4) 0.049(4) 0.007(3) 0.015(3) 0.011(3)
O30 0.038(3) 0.036(3) 0.065(4) 0.010(3) 0.009(3) 0.001(2)
O31 0.042(3) 0.042(3) 0.050(3) 0.007(2) 0.010(2) 0.007(2)
C32 0.038(4) 0.052(5) 0.053(4) -0.005(4) 0.003(4) 0.013(4)
C33 0.067(6) 0.067(6) 0.048(5) 0.003(4) 0.008(4) 0.020(5)
C41 0.038(4) 0.028(3) 0.062(4) 0.004(3) 0.019(3) 0.018(3)
C42 0.038(4) 0.030(4) 0.077(5) 0.004(3) 0.023(4) 0.014(3)
C43 0.044(4) 0.043(4) 0.076(5) 0.008(4) 0.028(4) 0.018(3)
C44 0.063(5) 0.057(5) 0.084(5) 0.010(5) 0.042(5) 0.021(4)
C45 0.070(6) 0.077(6) 0.075(5) 0.009(5) 0.033(4) 0.033(5)
C46 0.057(5) 0.062(6) 0.080(5) -0.013(5) 0.021(5) 0.018(4)
C47 0.049(5) 0.043(4) 0.074(5) -0.007(4) 0.022(4) 0.013(4)
C48 0.126(10) 0.102(7) 0.077(6) 0.002(5) 0.037(6) 0.037(8)
C49 0.115(10) 0.087(7) 0.092(7) 0.009(6) 0.021(7) 0.031(8)
O50 0.181(11) 0.099(6) 0.107(7) 0.016(6) 0.030(7) 0.028(7)
O51 0.192(11) 0.124(8) 0.143(9) -0.002(7) 0.103(9) 0.040(8)
N61 0.035(3) 0.021(3) 0.061(4) 0.009(3) 0.025(3) 0.009(2)
C62 0.036(4) 0.034(4) 0.063(4) 0.007(3) 0.029(4) 0.006(3)
C63 0.044(4) 0.025(4) 0.065(4) 0.006(3) 0.034(3) 0.005(3)
C64 0.044(4) 0.031(4) 0.071(4) 0.017(4) 0.038(3) 0.013(3)
C65 0.035(4) 0.025(3) 0.069(4) 0.010(3) 0.027(3) 0.006(3)
C66 0.032(4) 0.025(3) 0.066(5) 0.009(3) 0.029(3) 0.004(3)
C67 0.052(4) 0.031(4) 0.069(5) 0.010(4) 0.037(4) 0.005(4)
O68 0.065(4) 0.062(4) 0.087(5) -0.011(3) 0.045(4) 0.013(3)
O69 0.068(4) 0.047(3) 0.059(4) 0.006(3) 0.031(3) 0.022(3)
C71 0.036(4) 0.034(4) 0.080(5) 0.013(4) 0.027(4) 0.013(3)
O72 0.060(4) 0.069(4) 0.082(5) 0.017(3) 0.033(3) 0.039(3)
O73 0.041(3) 0.057(4) 0.074(4) -0.003(3) 0.008(3) 0.022(3)
P80 0.0450(13) 0.0709(16) 0.0532(14) 0.0014(12) 0.0120(11) 0.0217(12)
O81 0.066(4) 0.069(4) 0.077(5) 0.001(3) 0.003(3) 0.030(4)
O82 0.122(6) 0.072(4) 0.060(4) -0.002(3) 0.014(4) 0.046(4)
F83 0.109(5) 0.141(6) 0.095(5) 0.025(4) 0.064(4) 0.049(5)
F84 0.055(3) 0.146(6) 0.086(5) -0.006(4) -0.004(3) 0.034(4)
C91 0.084(7) 0.093(8) 0.085(6) 0.004(6) 0.020(6) 0.048(6)
C92 0.059(5) 0.062(5) 0.070(6) 0.016(5) 0.027(5) 0.031(4)
C93 0.069(6) 0.091(8) 0.099(8) 0.026(6) 0.048(6) 0.021(5)
O94 0.054(4) 0.073(4) 0.069(4) 0.021(3) 0.026(3) 0.018(3)

_geom_special_details            
; 
 All esds (except the esd in the dihedral angle between two l.s. planes) 
 are estimated using the full covariance matrix.  The cell esds are taken 
 into account individually in the estimation of esds in distances, angles 
 and torsion angles; correlations between esds in cell parameters are only 
 used when they are defined by crystal symmetry.  An approximate (isotropic) 
 treatment of cell esds is used for estimating esds involving l.s. planes. 
;

loop_
_geom_bond_atom_site_label_1
_geom_bond_atom_site_label_2
_geom_bond_distance
_geom_bond_site_symmetry_2
_geom_bond_publ_flag
Pt C41 2.087(6) . ?
Pt C2 2.093(7) . ?
Pt C1 2.104(7) . ?
Pt N22 2.155(5) . ?
Pt N11 2.157(6) . ?
Pt N61 2.180(5) . ?
C1 H1A 0.9800 . ?
C1 H1B 0.9800 . ?
C1 H1C 0.9800 . ?
C2 H2A 0.9800 . ?
C2 H2B 0.9800 . ?
C2 H2C 0.9800 . ?
N11 C12 1.347(9) . ?
N11 C16 1.360(9) . ?
C12 C13 1.371(11) . ?
C12 H12A 0.9500 . ?
C13 C14 1.388(10) . ?
C13 C23 1.497(11) . ?
C14 C15 1.367(11) . ?
C14 H14A 0.9500 . ?
C15 C16 1.378(10) . ?
C15 H15A 0.9500 . ?
C16 C17 1.468(10) . ?
C17 C18 1.376(10) . ?
C17 N22 1.384(9) . ?
C18 C19 1.355(11) . ?
C18 H18A 0.9500 . ?
C19 C20 1.403(10) . ?
C19 H19A 0.9500 . ?
C20 C21 1.375(10) . ?
C20 N28 1.378(9) . ?
C21 N22 1.312(9) . ?
C21 H21A 0.9500 . ?
C23 O24 1.199(9) . ?
C23 O25 1.331(10) . ?
O25 C26 1.452(10) . ?
C26 C27 1.465(14) . ?
C26 H26A 0.9900 . ?
C26 H26B 0.9900 . ?
C27 H27A 0.9800 . ?
C27 H27B 0.9800 . ?
C27 H27C 0.9800 . ?
N28 C29 1.364(9) . ?
N28 H28A 0.8800 . ?
C29 O30 1.198(9) . ?
C29 O31 1.330(9) . ?
O31 C32 1.467(9) . ?
C32 C33 1.456(12) . ?
C32 H32A 0.9900 . ?
C32 H32B 0.9900 . ?
C33 H33A 0.9800 . ?
C33 H33B 0.9800 . ?
C33 H33C 0.9800 . ?
C41 C42 1.494(12) . ?
C41 H41A 0.9900 . ?
C41 H41B 0.9900 . ?
C42 C43 1.393(11) . ?
C42 C47 1.401(11) . ?
C43 C44 1.364(13) . ?
C43 H43A 0.9500 . ?
C44 C45 1.376(14) . ?
C44 H44A 0.9500 . ?
C45 C46 1.380(14) . ?
C45 C48 1.526(15) . ?
C46 C47 1.390(14) . ?
C46 H46A 0.9500 . ?
C47 H47A 0.9500 . ?
C48 C49 1.331(17) . ?
C48 H48A 0.9900 . ?
C48 H48B 0.9900 . ?
C49 O50 1.215(15) . ?
C49 O51 1.434(17) . ?
O51 H51A 0.8400 . ?
N61 C66 1.338(10) . ?
N61 C62 1.342(10) . ?
C62 C63 1.385(10) . ?
C62 H62A 0.9500 . ?
C63 C64 1.388(11) . ?
C63 C67 1.504(12) . ?
C64 C65 1.367(11) . ?
C64 H64A 0.9500 . ?
C65 C66 1.394(10) . ?
C65 C71 1.475(11) . ?
C66 H66A 0.9500 . ?
C67 O68 1.206(9) . ?
C67 O69 1.315(10) . ?
O69 H69A 0.8400 . ?
C71 O72 1.211(9) . ?
C71 O73 1.323(10) . ?
O73 H73A 0.8400 . ?
P80 O82 1.442(7) . ?
P80 O81 1.450(7) . ?
P80 F83 1.524(7) . ?
P80 F84 1.535(6) . ?
C91 C92 1.455(14) . ?
C91 H91A 0.9800 . ?
C91 H91B 0.9800 . ?
C91 H91C 0.9800 . ?
C92 O94 1.222(11) . ?
C92 C93 1.487(13) . ?
C93 H93A 0.9800 . ?
C93 H93B 0.9800 . ?
C93 H93C 0.9800 . ?

loop_
_geom_angle_atom_site_label_1
_geom_angle_atom_site_label_2
_geom_angle_atom_site_label_3
_geom_angle
_geom_angle_site_symmetry_1
_geom_angle_site_symmetry_3
_geom_angle_publ_flag
C41 Pt C2 88.4(3) . . ?
C41 Pt C1 86.1(3) . . ?
C2 Pt C1 84.7(3) . . ?
C41 Pt N22 92.4(3) . . ?
C2 Pt N22 176.1(3) . . ?
C1 Pt N22 99.2(2) . . ?
C41 Pt N11 93.1(3) . . ?
C2 Pt N11 99.5(3) . . ?
C1 Pt N11 175.8(2) . . ?
N22 Pt N11 76.7(2) . . ?
C41 Pt N61 177.0(3) . . ?
C2 Pt N61 90.2(2) . . ?
C1 Pt N61 91.1(2) . . ?
N22 Pt N61 89.2(2) . . ?
N11 Pt N61 89.8(2) . . ?
Pt C1 H1A 109.5 . . ?
Pt C1 H1B 109.5 . . ?
H1A C1 H1B 109.5 . . ?
Pt C1 H1C 109.5 . . ?
H1A C1 H1C 109.5 . . ?
H1B C1 H1C 109.5 . . ?
Pt C2 H2A 109.5 . . ?
Pt C2 H2B 109.5 . . ?
H2A C2 H2B 109.5 . . ?
Pt C2 H2C 109.5 . . ?
H2A C2 H2C 109.5 . . ?
H2B C2 H2C 109.5 . . ?
C12 N11 C16 118.2(6) . . ?
C12 N11 Pt 125.1(5) . . ?
C16 N11 Pt 116.5(5) . . ?
N11 C12 C13 122.7(7) . . ?
N11 C12 H12A 118.7 . . ?
C13 C12 H12A 118.7 . . ?
C12 C13 C14 119.0(7) . . ?
C12 C13 C23 117.5(7) . . ?
C14 C13 C23 123.5(7) . . ?
C15 C14 C13 118.5(7) . . ?
C15 C14 H14A 120.7 . . ?
C13 C14 H14A 120.7 . . ?
C14 C15 C16 120.6(7) . . ?
C14 C15 H15A 119.7 . . ?
C16 C15 H15A 119.7 . . ?
N11 C16 C15 121.0(7) . . ?
N11 C16 C17 115.0(6) . . ?
C15 C16 C17 124.0(6) . . ?
C18 C17 N22 118.4(7) . . ?
C18 C17 C16 124.5(7) . . ?
N22 C17 C16 117.1(6) . . ?
C19 C18 C17 122.2(7) . . ?
C19 C18 H18A 118.9 . . ?
C17 C18 H18A 118.9 . . ?
C18 C19 C20 119.0(7) . . ?
C18 C19 H19A 120.5 . . ?
C20 C19 H19A 120.5 . . ?
C21 C20 N28 118.2(7) . . ?
C21 C20 C19 116.4(7) . . ?
N28 C20 C19 125.3(7) . . ?
N22 C21 C20 124.9(7) . . ?
N22 C21 H21A 117.6 . . ?
C20 C21 H21A 117.6 . . ?
C21 N22 C17 119.0(6) . . ?
C21 N22 Pt 126.4(5) . . ?
C17 N22 Pt 114.6(5) . . ?
O24 C23 O25 125.0(8) . . ?
O24 C23 C13 123.3(8) . . ?
O25 C23 C13 111.7(7) . . ?
C23 O25 C26 116.5(7) . . ?
O25 C26 C27 108.6(9) . . ?
O25 C26 H26A 110.0 . . ?
C27 C26 H26A 110.0 . . ?
O25 C26 H26B 110.0 . . ?
C27 C26 H26B 110.0 . . ?
H26A C26 H26B 108.3 . . ?
C26 C27 H27A 109.5 . . ?
C26 C27 H27B 109.5 . . ?
H27A C27 H27B 109.5 . . ?
C26 C27 H27C 109.5 . . ?
H27A C27 H27C 109.5 . . ?
H27B C27 H27C 109.5 . . ?
C29 N28 C20 126.5(7) . . ?
C29 N28 H28A 116.7 . . ?
C20 N28 H28A 116.7 . . ?
O30 C29 O31 125.4(7) . . ?
O30 C29 N28 125.3(8) . . ?
O31 C29 N28 109.3(7) . . ?
C29 O31 C32 116.6(6) . . ?
C33 C32 O31 107.4(7) . . ?
C33 C32 H32A 110.2 . . ?
O31 C32 H32A 110.2 . . ?
C33 C32 H32B 110.2 . . ?
O31 C32 H32B 110.2 . . ?
H32A C32 H32B 108.5 . . ?
C32 C33 H33A 109.5 . . ?
C32 C33 H33B 109.5 . . ?
H33A C33 H33B 109.5 . . ?
C32 C33 H33C 109.5 . . ?
H33A C33 H33C 109.5 . . ?
H33B C33 H33C 109.5 . . ?
C42 C41 Pt 113.5(5) . . ?
C42 C41 H41A 108.9 . . ?
Pt C41 H41A 108.9 . . ?
C42 C41 H41B 108.9 . . ?
Pt C41 H41B 108.9 . . ?
H41A C41 H41B 107.7 . . ?
C43 C42 C47 116.0(9) . . ?
C43 C42 C41 122.8(8) . . ?
C47 C42 C41 121.0(7) . . ?
C44 C43 C42 122.5(9) . . ?
C44 C43 H43A 118.8 . . ?
C42 C43 H43A 118.8 . . ?
C43 C44 C45 122.0(9) . . ?
C43 C44 H44A 119.0 . . ?
C45 C44 H44A 119.0 . . ?
C44 C45 C46 116.5(10) . . ?
C44 C45 C48 118.7(10) . . ?
C46 C45 C48 124.7(11) . . ?
C45 C46 C47 122.4(9) . . ?
C45 C46 H46A 118.8 . . ?
C47 C46 H46A 118.8 . . ?
C46 C47 C42 120.5(9) . . ?
C46 C47 H47A 119.8 . . ?
C42 C47 H47A 119.8 . . ?
C49 C48 C45 119.6(13) . . ?
C49 C48 H48A 107.4 . . ?
C45 C48 H48A 107.4 . . ?
C49 C48 H48B 107.4 . . ?
C45 C48 H48B 107.4 . . ?
H48A C48 H48B 107.0 . . ?
O50 C49 C48 128.5(16) . . ?
O50 C49 O51 116.4(13) . . ?
C48 C49 O51 115.0(13) . . ?
C49 O51 H51A 109.5 . . ?
C66 N61 C62 117.6(6) . . ?
C66 N61 Pt 119.6(5) . . ?
C62 N61 Pt 122.7(5) . . ?
N61 C62 C63 122.8(8) . . ?
N61 C62 H62A 118.6 . . ?
C63 C62 H62A 118.6 . . ?
C62 C63 C64 118.5(8) . . ?
C62 C63 C67 120.3(8) . . ?
C64 C63 C67 121.1(7) . . ?
C65 C64 C63 119.5(7) . . ?
C65 C64 H64A 120.2 . . ?
C63 C64 H64A 120.2 . . ?
C64 C65 C66 118.3(8) . . ?
C64 C65 C71 121.3(7) . . ?
C66 C65 C71 120.4(8) . . ?
N61 C66 C65 123.2(8) . . ?
N61 C66 H66A 118.4 . . ?
C65 C66 H66A 118.4 . . ?
O68 C67 O69 125.1(9) . . ?
O68 C67 C63 122.5(9) . . ?
O69 C67 C63 112.4(7) . . ?
C67 O69 H69A 109.5 . . ?
O72 C71 O73 123.2(8) . . ?
O72 C71 C65 123.3(8) . . ?
O73 C71 C65 113.5(6) . . ?
C71 O73 H73A 109.5 . . ?
O82 P80 O81 122.2(4) . . ?
O82 P80 F83 109.0(5) . . ?
O81 P80 F83 108.8(4) . . ?
O82 P80 F84 109.4(4) . . ?
O81 P80 F84 107.4(4) . . ?
F83 P80 F84 97.0(4) . . ?
C92 C91 H91A 109.5 . . ?
C92 C91 H91B 109.5 . . ?
H91A C91 H91B 109.5 . . ?
C92 C91 H91C 109.5 . . ?
H91A C91 H91C 109.5 . . ?
H91B C91 H91C 109.5 . . ?
O94 C92 C91 121.3(10) . . ?
O94 C92 C93 119.9(10) . . ?
C91 C92 C93 118.9(10) . . ?
C92 C93 H93A 109.5 . . ?
C92 C93 H93B 109.5 . . ?
H93A C93 H93B 109.5 . . ?
C92 C93 H93C 109.5 . . ?
H93A C93 H93C 109.5 . . ?
H93B C93 H93C 109.5 . . ?

loop_
_geom_torsion_atom_site_label_1
_geom_torsion_atom_site_label_2
_geom_torsion_atom_site_label_3
_geom_torsion_atom_site_label_4
_geom_torsion
_geom_torsion_site_symmetry_1
_geom_torsion_site_symmetry_2
_geom_torsion_site_symmetry_3
_geom_torsion_site_symmetry_4
_geom_torsion_publ_flag
C41 Pt N11 C12 86.7(6) . . . . ?
C2 Pt N11 C12 -2.1(6) . . . . ?
C1 Pt N11 C12 166(3) . . . . ?
N22 Pt N11 C12 178.5(6) . . . . ?
N61 Pt N11 C12 -92.3(5) . . . . ?
C41 Pt N11 C16 -88.3(5) . . . . ?
C2 Pt N11 C16 -177.1(5) . . . . ?
C1 Pt N11 C16 -9(3) . . . . ?
N22 Pt N11 C16 3.5(4) . . . . ?
N61 Pt N11 C16 92.7(5) . . . . ?
C16 N11 C12 C13 1.7(10) . . . . ?
Pt N11 C12 C13 -173.2(5) . . . . ?
N11 C12 C13 C14 -1.6(11) . . . . ?
N11 C12 C13 C23 177.9(6) . . . . ?
C12 C13 C14 C15 0.0(11) . . . . ?
C23 C13 C14 C15 -179.5(7) . . . . ?
C13 C14 C15 C16 1.4(11) . . . . ?
C12 N11 C16 C15 -0.2(9) . . . . ?
Pt N11 C16 C15 175.1(5) . . . . ?
C12 N11 C16 C17 179.8(6) . . . . ?
Pt N11 C16 C17 -4.9(7) . . . . ?
C14 C15 C16 N11 -1.3(10) . . . . ?
C14 C15 C16 C17 178.6(6) . . . . ?
N11 C16 C17 C18 -178.1(6) . . . . ?
C15 C16 C17 C18 1.9(11) . . . . ?
N11 C16 C17 N22 3.6(8) . . . . ?
C15 C16 C17 N22 -176.3(6) . . . . ?
N22 C17 C18 C19 -1.3(10) . . . . ?
C16 C17 C18 C19 -179.5(6) . . . . ?
C17 C18 C19 C20 -1.3(10) . . . . ?
C18 C19 C20 C21 3.3(10) . . . . ?
C18 C19 C20 N28 -179.1(6) . . . . ?
N28 C20 C21 N22 179.2(6) . . . . ?
C19 C20 C21 N22 -3.0(10) . . . . ?
C20 C21 N22 C17 0.4(10) . . . . ?
C20 C21 N22 Pt -178.7(5) . . . . ?
C18 C17 N22 C21 1.8(9) . . . . ?
C16 C17 N22 C21 -179.9(6) . . . . ?
C18 C17 N22 Pt -179.0(5) . . . . ?
C16 C17 N22 Pt -0.6(7) . . . . ?
C41 Pt N22 C21 -89.6(6) . . . . ?
C2 Pt N22 C21 169(3) . . . . ?
C1 Pt N22 C21 -3.1(6) . . . . ?
N11 Pt N22 C21 177.8(6) . . . . ?
N61 Pt N22 C21 87.8(6) . . . . ?
C41 Pt N22 C17 91.2(5) . . . . ?
C2 Pt N22 C17 -10(4) . . . . ?
C1 Pt N22 C17 177.7(4) . . . . ?
N11 Pt N22 C17 -1.4(4) . . . . ?
N61 Pt N22 C17 -91.4(5) . . . . ?
C12 C13 C23 O24 12.0(12) . . . . ?
C14 C13 C23 O24 -168.5(8) . . . . ?
C12 C13 C23 O25 -167.6(7) . . . . ?
C14 C13 C23 O25 11.9(10) . . . . ?
O24 C23 O25 C26 2.2(12) . . . . ?
C13 C23 O25 C26 -178.3(7) . . . . ?
C23 O25 C26 C27 -164.4(10) . . . . ?
C21 C20 N28 C29 -178.9(7) . . . . ?
C19 C20 N28 C29 3.5(11) . . . . ?
C20 N28 C29 O30 3.9(12) . . . . ?
C20 N28 C29 O31 -178.9(6) . . . . ?
O30 C29 O31 C32 -8.3(11) . . . . ?
N28 C29 O31 C32 174.5(6) . . . . ?
C29 O31 C32 C33 165.8(7) . . . . ?
C2 Pt C41 C42 75.7(6) . . . . ?
C1 Pt C41 C42 160.5(6) . . . . ?
N22 Pt C41 C42 -100.5(5) . . . . ?
N11 Pt C41 C42 -23.7(5) . . . . ?
N61 Pt C41 C42 138(5) . . . . ?
Pt C41 C42 C43 88.6(8) . . . . ?
Pt C41 C42 C47 -86.7(8) . . . . ?
C47 C42 C43 C44 2.2(12) . . . . ?
C41 C42 C43 C44 -173.4(8) . . . . ?
C42 C43 C44 C45 0.9(14) . . . . ?
C43 C44 C45 C46 -3.3(14) . . . . ?
C43 C44 C45 C48 173.7(9) . . . . ?
C44 C45 C46 C47 2.7(14) . . . . ?
C48 C45 C46 C47 -174.0(10) . . . . ?
C45 C46 C47 C42 0.3(14) . . . . ?
C43 C42 C47 C46 -2.7(11) . . . . ?
C41 C42 C47 C46 173.0(8) . . . . ?
C44 C45 C48 C49 137.0(14) . . . . ?
C46 C45 C48 C49 -46.2(19) . . . . ?
C45 C48 C49 O50 15(3) . . . . ?
C45 C48 C49 O51 -160.8(12) . . . . ?
C41 Pt N61 C66 -110(5) . . . . ?
C2 Pt N61 C66 -47.9(5) . . . . ?
C1 Pt N61 C66 -132.6(5) . . . . ?
N22 Pt N61 C66 128.2(5) . . . . ?
N11 Pt N61 C66 51.6(5) . . . . ?
C41 Pt N61 C62 65(5) . . . . ?
C2 Pt N61 C62 127.7(6) . . . . ?
C1 Pt N61 C62 43.0(6) . . . . ?
N22 Pt N61 C62 -56.2(5) . . . . ?
N11 Pt N61 C62 -132.8(5) . . . . ?
C66 N61 C62 C63 -0.2(10) . . . . ?
Pt N61 C62 C63 -175.9(5) . . . . ?
N61 C62 C63 C64 1.2(11) . . . . ?
N61 C62 C63 C67 177.8(6) . . . . ?
C62 C63 C64 C65 -2.1(11) . . . . ?
C67 C63 C64 C65 -178.8(7) . . . . ?
C63 C64 C65 C66 2.2(10) . . . . ?
C63 C64 C65 C71 -178.1(7) . . . . ?
C62 N61 C66 C65 0.3(10) . . . . ?
Pt N61 C66 C65 176.1(5) . . . . ?
C64 C65 C66 N61 -1.3(10) . . . . ?
C71 C65 C66 N61 179.0(6) . . . . ?
C62 C63 C67 O68 -159.5(8) . . . . ?
C64 C63 C67 O68 17.1(12) . . . . ?
C62 C63 C67 O69 21.5(10) . . . . ?
C64 C63 C67 O69 -161.9(7) . . . . ?
C64 C65 C71 O72 0.3(12) . . . . ?
C66 C65 C71 O72 -180.0(7) . . . . ?
C64 C65 C71 O73 178.8(7) . . . . ?
C66 C65 C71 O73 -1.6(10) . . . . ?

loop_
_geom_hbond_atom_site_label_D
_geom_hbond_atom_site_label_H
_geom_hbond_atom_site_label_A
_geom_hbond_distance_DH
_geom_hbond_distance_HA
_geom_hbond_distance_DA
_geom_hbond_angle_DHA
_geom_hbond_site_symmetry_A
N28 H28A O94 0.88 2.13 2.892(9) 144.7 .                               
O51 H51A O81 0.84 1.96 2.738(12) 154.6 1_544
O69 H69A O82 0.84 1.75 2.566(9) 162.3 .
O73 H73A O81 0.84 1.84 2.611(9) 150.9 2_666

_diffrn_measured_fraction_theta_max 0.980
_diffrn_reflns_theta_full        25.03
_diffrn_measured_fraction_theta_full 0.980
_refine_diff_density_max         1.453
_refine_diff_density_min         -1.123
_refine_diff_density_rms         0.143

#===END
